# Supplementary material
Source: HighWire-hosted journal article supplement (doi:10.1101/rna.035683.112)
Supplement: SuppLegends.docx [file SuppLegends.docx]

Figure S1: rRNA-derived small RNAs. (A) The length of rRNA-derived small RNAs in both stages. Blue bars represent the SF stage and red bars represent the PF stage. (B) The 20 nt small RNA and its flanking sequence distribution on the 28S rRNA. Left is the situation in the SF stage and right is the situation in the PF stage. The arrow indicates the region that generated the 20 nt small RNA.

Figure S2：The tRNAs which produced the 3 smallest RNAs in SF, including the length of small RNAs, the position of small RNA mapped to the sequence of tRNA and the sketch of tRNA structure, with the cleavage site where small RNAs derived from.

Figure S3: The tRNAs which produced the 3 smallest RNAs in PF, including the length of small RNAs, the position of small RNA mapped to the sequence of tRNA and the sketch of tRNA structure, with the cleavage site where small RNAs derived from.

Figure S4: (A) Star structure formed by members of the VSG family. Nodes represent the transcripts, the labels of the nodes represent the ID of the transcripts in GeneDB. Each two nodes are connected by a line represented sense and antisense transcripts in a NAT pair. (B) Example of a part of SLACS with small RNAs mapped. Six continuous pairs of siRNAs were mapped to this region. Each pair was composed of small RNAs of the same length and with 2 nt overhang.

**Supplemental Tables:**

Table S1. List of small RNAs expressed significantly differently in the two stages.

Table S2. List of all NAT pairs and their sense and antisense density in the two stages.

Table S3. List of all NAT pairs and their sense and antisense density in the PF stage and wide type of the procyclic form sequenced by other researchers (Tschudi et al., 2012).

Table S4. List of siRNAs expressed significantly differently in the two stages.

Table S5. List of transcripts targeted by the stage-specific siRNAs in SF.

Table S6. List of transcripts targeted by the stage-specific siRNAs in PF.

Table S7. The sequences of siRNAs and the primers applied for reverse transcription and quantitative real time PCR.
