# Supplementary material
Source: HighWire-hosted journal article supplement (doi:10.1101/rna.035683.112)
Supplement: SuppTables.xlsx [file SuppTables.xlsx]

## Sheet: S1
read1_id	read1_total	read2_id	read2_total	p_valus	fold_change
t0000028	15562	t0338259	1	0	15562
t0000102	8180	t0222950	1	0	8180
t0000158	6491	t0361045	1	0	6491
t0000223	5333	t0450714	1	0	5333
t0000229	5254	t0394102	1	0	5254
t0000239	5079	t0463287	1	0	5079
t0000274	4542	t0490018	1	0	4542
t0000330	4021	t0465578	1	0	4021
t0000355	3755	t0339203	1	0	3755
t0000021	18144	t0061499	5	0	3628.8
t0000377	3588	t0348627	1	0	3588
t0000469	3070	t0500329	1	0	3070
t0000183	6108	t0183720	2	0	3054
t0000491	2976	t0247674	1	0	2976
t0000497	2932	t0286125	1	0	2932
t0000519	2841	t0506116	1	0	2841
t0000520	2832	t0405583	1	0	2832
t0000094	8350	t0096237	3	0	2783.33
t0000567	2611	t0416925	1	0	2611
t0000232	5204	t0161197	2	0	2602
t0000116	7676	t0091742	3	0	2558.67
t0000253	4845	t0133816	2	0	2422.5
t0000626	2391	t0459662	1	0	2391
t0000627	2389	t0451135	1	0	2389
t0000632	2378	t0308952	1	0	2378
t0000694	2228	t0205246	1	0	2228
t0000710	2180	t0342315	1	0	2180
t0000711	2175	t0480226	1	0	2175
t0000750	2108	t0338734	1	0	2108
t0000307	4206	t0122514	2	0	2103
t0000103	8116	t0076548	4	0	2029
t0000776	2026	t0597642	1	0	2026
t0000327	4051	t0151968	2	0	2025.5
t0000815	1943	t0248671	1	0	1943
t0000852	1870	t0367632	1	0	1870
t0000860	1861	t0585872	1	0	1861
t0000880	1839	t0212267	1	0	1839
t0000126	7326	t0072025	4	0	1831.5
t0000926	1762	t0312384	1	0	1762
t0000070	10334	t0054809	6	0	1722.33
t0000957	1716	t0577995	1	0	1716
t0000964	1705	t0412595	1	0	1705
t0000977	1681	t0598881	1	0	1681
t0000978	1680	t0512051	1	0	1680
t0000985	1668	t0518732	1	0	1668
t0000431	3247	t0159679	2	0	1623.5
t0001039	1594	t0466935	1	0	1594
t0000262	4756	t0107145	3	0	1585.33
t0001047	1584	t0537734	1	0	1584
t0000471	3064	t0158062	2	0	1532
t0001129	1485	t0448060	1	0	1485
t0001156	1452	t0450047	1	0	1452
t0000300	4285	t0087977	3	0	1428.33
t0001190	1408	t0473949	1	0	1408
t0000538	2753	t0133830	2	0	1376.5
t0000547	2714	t0154025	2	0	1357
t0001259	1339	t0233544	1	0	1339
t0001266	1333	t0288870	1	0	1333
t0000014	22431	t0026536	17	0	1319.47
t0001290	1312	t0478356	1	0	1312
t0001315	1294	t0499972	1	0	1294
t0001327	1285	t0277639	1	0	1285
t0001373	1241	t0387389	1	4.94066e-324	1241
t0001376	1240	t0454122	1	4.94066e-324	1240
t0000359	3699	t0089938	3	0	1233
t0001410	1220	t0372328	1	8.97273e-319	1220
t0000615	2420	t0172347	2	0	1210
t0001432	1203	t0367606	1	2.58959e-314	1203
t0001435	1199	t0300201	1	2.90203e-313	1199
t0000392	3491	t0091929	3	0	1163.67
t0001487	1156	t0191711	1	5.54894e-302	1156
t0001491	1154	t0560074	1	1.85745e-301	1154
t0001493	1152	t0583861	1	6.21761e-301	1152
t0001509	1139	t0226710	1	1.60022e-297	1139
t0001513	1138	t0463267	1	2.9277e-297	1138
t0000404	3377	t0106449	3	0	1125.67
t0000282	4459	t0077539	4	0	1114.75
t0001549	1114	t0280606	1	5.79137e-291	1114
t0000285	4445	t0074636	4	0	1111.25
t0001561	1099	t0561927	1	4.98699e-287	1099
t0001567	1093	t0279371	1	1.86999e-285	1093
t0001573	1090	t0283471	1	1.14508e-284	1090
t0001599	1077	t0284568	1	2.94517e-281	1077
t0001613	1068	t0264098	1	6.76135e-279	1068
t0000736	2134	t0129755	2	0	1067
t0001628	1062	t0507293	1	2.53493e-277	1062
t0000080	9519	t0041731	9	0	1057.67
t0001645	1053	t0241228	1	5.81885e-275	1053
t0001647	1050	t0266720	1	3.56277e-274	1050
t0001649	1050	t0431268	1	3.56277e-274	1050
t0001662	1045	t0307321	1	7.30068e-273	1045
t0000069	10349	t0037941	10	0	1034.9
t0001685	1034	t0476915	1	5.60784e-270	1034
t0001695	1030	t0188269	1	6.28104e-269	1030
t0001722	1018	t0190149	1	8.8247e-266	1018
t0001744	1008	t0358040	1	3.70435e-263	1008
t0001758	1002	t0361347	1	1.38835e-261	1002
t0000333	3992	t0078934	4	0	998
t0001776	993	t0493668	1	3.18529e-259	993
t0001784	990	t0225104	1	1.94996e-258	990
t0000807	1956	t0157836	2	0	978
t0001809	976	t0514749	1	9.16345e-255	976
t0000819	1939	t0141977	2	0	969.5
t0000822	1937	t0132619	2	0	968.5
t0001822	968	t0568001	1	1.14901e-252	968
t0001854	952	t0580906	1	1.8062e-248	952
t0000854	1869	t0159074	2	0	934.5
t0001902	932	t0528008	1	3.17795e-243	932
t0001909	930	t0435173	1	1.06335e-242	930
t0000863	1856	t0176491	2	0	928
t0001917	925	t0441389	1	2.17763e-241	925
t0001919	924	t0251110	1	3.98332e-241	924
t0001935	919	t0502413	1	8.15716e-240	919
t0000363	3660	t0069377	4	0	915
t0000888	1826	t0179954	2	0	913
t0001961	906	t0382491	1	2.09336e-236	906
t0000902	1804	t0152749	2	0	902
t0001998	891	t0362908	1	1.797e-232	891
t0000559	2669	t0100464	3	0	889.667
t0002006	887	t0262427	1	2.01148e-231	887
t0002018	880	t0333884	1	1.3778e-229	880
t0000568	2610	t0094773	3	0	870
t0000570	2596	t0106373	3	0	865.333
t0002056	865	t0542631	1	1.18216e-225	865
t0000954	1719	t0146542	2	0	859.5
t0002098	851	t0594078	1	5.54388e-222	851
t0002107	847	t0607470	1	6.20425e-221	847
t0002120	842	t0205250	1	1.2699e-219	842
t0002132	838	t0537586	1	1.4211e-218	838
t0002136	837	t0488785	1	2.59918e-218	837
t0000594	2505	t0087472	3	0	835
t0002155	828	t0491119	1	5.95273e-216	828
t0000418	3302	t0075251	4	0	825.5
t0002175	823	t0455417	1	1.21826e-214	823
t0002177	822	t0496558	1	2.22813e-214	822
t0002178	822	t0526635	1	2.22813e-214	822
t0001005	1639	t0183444	2	0	819.5
t0002195	816	t0352351	1	8.33956e-213	816
t0002199	815	t0600296	1	1.52525e-212	815
t0002216	808	t0228544	1	1.04402e-210	808
t0002224	806	t0580383	1	3.49216e-210	806
t0002222	806	t0325285	1	3.49216e-210	806
t0002226	803	t0517555	1	2.13632e-209	803
t0002230	802	t0393399	1	3.90711e-209	802
t0002238	799	t0433594	1	2.39013e-208	799
t0000444	3186	t0079580	4	0	796.5
t0002251	796	t0492787	1	1.46211e-207	796
t0000639	2373	t0099183	3	0	791
t0001052	1580	t0143074	2	0	790
t0002271	789	t0484911	1	1.00059e-205	789
t0001059	1568	t0112297	2	0	784
t0002291	780	t0482871	1	2.29009e-203	780
t0001080	1541	t0160133	2	0	770.5
t0002325	769	t0455537	1	1.75277e-200	769
t0001092	1530	t0151450	2	0	765
t0002335	765	t0273611	1	1.96057e-199	765
t0002340	762	t0456355	1	1.19914e-198	762
t0001111	1508	t0131475	2	0	754
t0002373	753	t0315175	1	2.74339e-196	753
t0002384	750	t0326781	1	1.67782e-195	750
t0002398	745	t0191076	1	3.4316e-194	745
t0002416	741	t0333347	1	3.8378e-193	741
t0002418	740	t0316112	1	7.01822e-193	740
t0002424	739	t0562798	1	1.28343e-192	739
t0000496	2937	t0079045	4	0	734.25
t0002452	732	t0192936	1	8.77718e-191	732
t0001155	1457	t0182454	2	0	728.5
t0000504	2904	t0079195	4	0	726
t0002470	724	t0209523	1	1.09757e-188	724
t0000506	2895	t0070832	4	0	723.75
t0002482	720	t0272022	1	1.2273e-187	720
t0002495	718	t0383339	1	4.10398e-187	718
t0002492	718	t0434514	1	4.10398e-187	718
t0000727	2152	t0093720	3	0	717.333
t0001177	1425	t0166461	2	0	712.5
t0002545	706	t0599104	1	5.73668e-184	706
t0002558	703	t0212479	1	3.50756e-183	703
t0002570	700	t0394160	1	2.14458e-182	700
t0002601	691	t0459775	1	4.90122e-180	691
t0000182	6118	t0041410	9	0	679.778
t0002640	679	t0395164	1	6.84658e-177	679
t0001243	1355	t0158821	2	0	677.5
t0000561	2664	t0074319	4	0	666
t0002710	662	t0292359	1	1.95389e-172	662
t0000338	3970	t0057634	6	0	661.667
t0000109	7937	t0033300	12	0	661.417
t0002718	659	t0238545	1	1.19432e-171	659
t0001292	1311	t0116949	2	0	655.5
t0002740	655	t0562881	1	1.33476e-170	655
t0002757	651	t0500236	1	1.49167e-169	651
t0001312	1296	t0120668	2	0	648
t0002799	644	t0589092	1	1.01882e-167	644
t0001332	1283	t0152924	2	0	641.5
t0002822	639	t0581785	1	2.08149e-166	639
t0002826	639	t0603066	1	2.08149e-166	639
t0000446	3185	t0062412	5	0	637
t0000447	3180	t0067382	5	0	636
t0002835	636	t0350602	1	1.27211e-165	636
t0002848	634	t0575264	1	4.25228e-165	634
t0000452	3161	t0061003	5	0	632.2
t0001354	1255	t0131908	2	0	627.5
t0000846	1876	t0099618	3	0	625.333
t0002900	624	t0267624	1	1.77434e-162	624
t0000246	4956	t0045020	8	0	619.5
t0002926	619	t0411981	1	3.62413e-161	619
t0000864	1855	t0094846	3	0	618.333
t0002929	618	t0361700	1	6.62573e-161	618
t0002970	610	t0297388	1	8.26862e-159	610
t0002968	610	t0407002	1	8.26862e-159	610
t0002979	607	t0389120	1	5.05229e-158	607
t0002982	607	t0600846	1	5.05229e-158	607
t0002986	606	t0235692	1	9.23645e-158	606
t0002997	603	t0446059	1	5.64347e-157	603
t0001429	1205	t0140475	2	2.12287e-312	602.5
t0003004	601	t0438201	1	1.88612e-156	601
t0003009	600	t0305913	1	3.44808e-156	600
t0003013	599	t0491080	1	6.30355e-156	599
t0003030	595	t0526101	1	7.04053e-155	595
t0003034	594	t0297131	1	1.28708e-154	594
t0003044	593	t0537991	1	2.35292e-154	593
t0001460	1180	t0132087	2	7.53327e-306	590
t0003071	587	t0541413	1	8.78186e-153	587
t0001467	1173	t0179573	2	5.13962e-304	586.5
t0003075	586	t0506931	1	1.60538e-152	586
t0000390	3512	t0054791	6	0	585.333
t0000321	4097	t0050844	7	0	585.286
t0003090	584	t0201896	1	5.36487e-152	584
t0003091	584	t0237164	1	5.36487e-152	584
t0001480	1164	t0131733	2	1.17171e-301	582
t0001483	1162	t0141000	2	3.9155e-301	581
t0003105	581	t0537196	1	3.27733e-151	581
t0001485	1158	t0177930	2	4.37236e-300	579
t0003128	576	t0193311	1	6.69005e-150	576
t0003131	576	t0415255	1	6.69005e-150	576
t0000054	11496	t0023419	20	0	574.8
t0000172	6322	t0036604	11	0	574.727
t0000951	1722	t0103683	3	0	574
t0001497	1146	t0173561	2	6.08751e-297	573
t0003175	566	t0248853	1	2.78709e-147	566
t0001527	1129	t0125816	2	1.72936e-292	564.5
t0000010	25294	t0013267	45	0	562.089
t0000206	5617	t0038546	10	0	561.7
t0003229	560	t0338964	1	1.03973e-145	560
t0000980	1678	t0092758	3	0	559.333
t0003235	559	t0398996	1	1.90054e-145	559
t0000689	2234	t0072577	4	0	558.5
t0000281	4461	t0043769	8	0	557.625
t0003259	555	t0344395	1	2.12173e-144	555
t0003273	554	t0370545	1	3.87829e-144	554
t0003284	552	t0342650	1	1.29579e-143	552
t0003294	550	t0458503	1	4.32937e-143	550
t0003303	549	t0439925	1	7.91349e-143	549
t0003317	547	t0574591	1	2.64393e-142	547
t0003320	546	t0570931	1	4.83268e-142	546
t0003327	545	t0537037	1	8.83333e-142	545
t0001583	1086	t0163535	2	3.17392e-281	543
t0000716	2168	t0075581	4	0	542
t0001019	1621	t0088705	3	0	540.333
t0003358	538	t0355490	1	6.02065e-140	538
t0003367	537	t0471645	1	1.10045e-139	537
t0003369	537	t0605059	1	1.10045e-139	537
t0003372	536	t0523973	1	2.01137e-139	536
t0003382	535	t0266026	1	3.67633e-139	535
t0003399	533	t0560393	1	1.22816e-138	533
t0000120	7453	t0029620	14	0	532.357
t0001641	1054	t0142171	2	7.63872e-273	527
t0003428	526	t0282295	1	8.3685e-137	526
t0003434	526	t0451511	1	8.3685e-137	526
t0003443	524	t0356699	1	2.79551e-136	524
t0003452	524	t0505988	1	2.79551e-136	524
t0003471	521	t0595894	1	1.70674e-135	521
t0001671	1041	t0140419	2	1.93977e-269	520.5
t0001679	1037	t0124838	2	2.16437e-268	518.5
t0003499	517	t0259090	1	1.90439e-134	517
t0000316	4120	t0047110	8	0	515
t0003514	515	t0412996	1	6.3612e-134	515
t0001700	1029	t0162956	2	2.69437e-266	514.5
t0001081	1539	t0084117	3	0	513
t0003536	512	t0301825	1	3.88332e-133	512
t0003539	511	t0196341	1	7.09721e-133	511
t0003545	511	t0465069	1	7.09721e-133	511
t0003548	510	t0401515	1	1.29709e-132	510
t0003549	510	t0583334	1	1.29709e-132	510
t0001718	1019	t0144802	2	1.12019e-263	509.5
t0000270	4583	t0041315	9	0	509.222
t0003570	507	t0321760	1	7.91791e-132	507
t0000382	3544	t0049855	7	0	506.286
t0000780	2023	t0076489	4	0	505.75
t0003587	505	t0467111	1	2.64461e-131	505
t0001745	1008	t0168827	2	8.50965e-261	504
t0003591	504	t0327957	1	4.8332e-131	504
t0003600	503	t0418105	1	8.83296e-131	503
t0003612	501	t0335774	1	2.95015e-130	501
t0003619	500	t0450570	1	5.39151e-130	500
t0003631	499	t0300489	1	9.85315e-130	499
t0001767	997	t0184823	2	6.46294e-258	498.5
t0003634	498	t0402044	1	1.80069e-129	498
t0003640	497	t0307459	1	3.29078e-129	497
t0003656	496	t0581239	1	6.01393e-129	496
t0003677	492	t0502524	1	6.70778e-128	492
t0003683	492	t0465450	1	6.70778e-128	492
t0003692	490	t0324651	1	2.24016e-127	490
t0000500	2917	t0056030	6	0	486.167
t0001154	1458	t0096323	3	0	486
t0003723	485	t0612327	1	4.56558e-126	485
t0003724	485	t0196453	1	4.56558e-126	485
t0003735	484	t0316028	1	8.34322e-126	484
t0003736	483	t0453743	1	1.52465e-125	483
t0000826	1930	t0081241	4	0	482.5
t0001837	960	t0112345	2	3.15255e-248	480
t0001166	1436	t0106663	3	0	478.667
t0003777	478	t0241864	1	3.10687e-124	478
t0003787	477	t0269562	1	5.67738e-124	477
t0000299	4292	t0041127	9	0	476.889
t0001851	953	t0130486	2	2.14501e-246	476.5
t0003792	476	t0375990	1	1.03746e-123	476
t0003814	475	t0572814	1	1.8958e-123	475
t0003821	474	t0423408	1	3.46427e-123	474
t0003824	473	t0353284	1	6.33038e-123	473
t0003837	472	t0424618	1	1.15677e-122	472
t0003834	472	t0571752	1	1.15677e-122	472
t0003845	471	t0439545	1	2.11378e-122	471
t0003853	470	t0265409	1	3.86252e-122	470
t0003848	470	t0192361	1	3.86252e-122	470
t0003856	470	t0466217	1	3.86252e-122	470
t0003869	468	t0488752	1	1.2897e-121	468
t0000650	2339	t0061862	5	0	467.8
t0003881	467	t0272702	1	2.35664e-121	467
t0003883	467	t0590414	1	2.35664e-121	467
t0000856	1867	t0072059	4	0	466.75
t0003887	466	t0365828	1	4.30624e-121	466
t0003896	465	t0612409	1	7.86864e-121	465
t0000122	7437	t0027995	16	0	464.812
t0001913	928	t0169858	2	7.52737e-240	464
t0003905	464	t0561736	1	1.4378e-120	464
t0001207	1389	t0087195	3	0	463
t0001916	925	t0179872	2	4.59227e-239	462.5
t0003921	461	t0235766	1	8.77178e-120	461
t0003936	459	t0532455	1	2.92867e-119	459
t0003939	459	t0190963	1	2.92867e-119	459
t0000667	2293	t0063134	5	0	458.6
t0001942	916	t0148232	2	1.04262e-236	458
t0003945	458	t0256357	1	5.35128e-119	458
t0003947	458	t0388677	1	5.35128e-119	458
t0003943	458	t0341583	1	5.35128e-119	458
t0003949	458	t0486525	1	5.35128e-119	458
t0000165	6398	t0029750	14	0	457
t0001946	914	t0126113	2	3.4809e-236	457
t0003950	457	t0238016	1	9.77785e-119	457
t0000676	2281	t0064266	5	0	456.2
t0003972	455	t0604254	1	3.26444e-118	455
t0003997	452	t0246809	1	1.99132e-117	452
t0004007	451	t0255021	1	3.63844e-117	451
t0001975	899	t0137656	2	2.93972e-232	449.5
t0004031	449	t0316828	1	1.21466e-116	449
t0004043	448	t0306621	1	2.21933e-116	448
t0004071	445	t0529558	1	1.35366e-115	445
t0004072	445	t0532430	1	1.35366e-115	445
t0004075	445	t0302738	1	1.35366e-115	445
t0004139	439	t0403576	1	5.03535e-114	439
t0004149	438	t0376317	1	9.19972e-114	438
t0004171	436	t0607444	1	3.07085e-113	436
t0004169	436	t0396301	1	3.07085e-113	436
t0002041	870	t0149019	2	1.1457e-224	435
t0004176	435	t0405132	1	5.61044e-113	435
t0001307	1302	t0108788	3	0	434
t0001316	1294	t0104217	3	0	431.333
t0004203	431	t0332999	1	6.2507e-112	431
t0004215	431	t0479426	1	6.2507e-112	431
t0004216	431	t0523720	1	6.2507e-112	431
t0000397	3441	t0043872	8	0	430.125
t0004223	430	t0392140	1	1.14197e-111	430
t0002072	859	t0165573	2	8.67121e-222	429.5
t0004242	428	t0570646	1	3.81156e-111	428
t0004250	427	t0558912	1	6.96343e-111	427
t0004263	425	t0189294	1	2.32411e-110	425
t0004271	425	t0189763	1	2.32411e-110	425
t0004265	425	t0201801	1	2.32411e-110	425
t0004277	424	t0436038	1	4.2459e-110	424
t0004294	423	t0204809	1	7.75676e-110	423
t0004301	422	t0412198	1	1.41706e-109	422
t0004323	419	t0317698	1	8.63972e-109	419
t0004337	417	t0494896	1	2.88333e-108	417
t0004334	417	t0208137	1	2.88333e-108	417
t0002147	831	t0150104	2	1.84425e-214	415.5
t0004364	415	t0311413	1	9.62231e-108	415
t0004369	415	t0576724	1	9.62231e-108	415
t0004373	414	t0246004	1	1.7578e-107	414
t0004375	414	t0214880	1	1.7578e-107	414
t0000357	3715	t0041647	9	0	412.778
t0004393	412	t0451664	1	5.86595e-107	412
t0000250	4917	t0034363	12	0	409.75
t0002191	817	t0172890	2	8.49821e-211	408.5
t0002194	816	t0114135	2	1.55238e-210	408
t0004429	408	t0361895	1	6.53203e-106	408
t0004440	407	t0232960	1	1.19322e-105	407
t0004438	407	t0485869	1	1.19322e-105	407
t0004451	406	t0319359	1	2.17966e-105	406
t0001020	1620	t0078599	4	0	405
t0001430	1204	t0101453	3	7.10026e-310	401.333
t0000443	3200	t0044967	8	0	400
t0004500	400	t0387887	1	8.09737e-104	400
t0002243	798	t0178589	2	7.95838e-206	399
t0004511	399	t0210373	1	1.47909e-103	399
t0004520	398	t0408676	1	2.70173e-103	398
t0004525	398	t0398224	1	2.70173e-103	398
t0004527	398	t0461748	1	2.70173e-103	398
t0000799	1981	t0060147	5	0	396.2
t0001450	1186	t0090655	3	3.63774e-305	395.333
t0004562	395	t0442397	1	1.64652e-102	395
t0004580	393	t0315893	1	5.49336e-102	393
t0002281	785	t0164739	2	2.00491e-202	392.5
t0004587	392	t0329758	1	1.00339e-101	392
t0004609	391	t0588272	1	1.83272e-101	391
t0004600	391	t0441728	1	1.83272e-101	391
t0001066	1557	t0073068	4	0	389.25
t0004618	389	t0330734	1	6.11428e-101	389
t0002299	777	t0168257	2	2.48353e-200	388.5
t0004631	388	t0309241	1	1.11677e-100	388
t0004636	388	t0561566	1	1.11677e-100	388
t0004653	387	t0197005	1	2.03977e-100	387
t0004660	386	t0278668	1	3.7256e-100	386
t0004671	385	t0225627	1	6.80467e-100	385
t0004703	383	t0392859	1	2.26997e-99	383
t0004733	381	t0414054	1	7.57222e-99	381
t0002346	760	t0150056	2	6.95554e-196	380
t0004744	380	t0503125	1	1.38299e-98	380
t0002350	759	t0132684	2	1.27034e-195	379.5
t0004751	379	t0313949	1	2.52588e-98	379
t0004765	378	t0607833	1	4.61322e-98	378
t0004775	377	t0501453	1	8.42543e-98	377
t0004785	377	t0439420	1	8.42543e-98	377
t0004772	377	t0255408	1	8.42543e-98	377
t0004781	377	t0251707	1	8.42543e-98	377
t0004793	376	t0522062	1	1.53878e-97	376
t0004817	375	t0609541	1	2.81034e-97	375
t0000848	1874	t0062693	5	0	374.8
t0000853	1870	t0066521	5	0	374
t0004838	373	t0451217	1	9.37374e-97	373
t0004841	373	t0228461	1	9.37374e-97	373
t0004862	372	t0578325	1	1.71193e-96	372
t0004863	371	t0195577	1	3.12647e-96	371
t0004877	370	t0526916	1	5.70981e-96	370
t0000873	1847	t0066164	5	0	369.4
t0000324	4061	t0036153	11	0	369.182
t0001144	1473	t0070022	4	0	368.25
t0004898	368	t0453284	1	1.90434e-95	368
t0004901	368	t0261339	1	1.90434e-95	368
t0002448	734	t0173280	2	4.39731e-189	367
t0004915	367	t0569001	1	3.47778e-95	367
t0000884	1833	t0065918	5	0	366.6
t0002451	732	t0119269	2	1.46651e-188	366
t0000582	2553	t0048973	7	0	364.714
t0002461	728	t0180401	2	1.63104e-187	364
t0004943	364	t0599195	1	2.11813e-94	364
t0000712	2173	t0053708	6	0	362.167
t0004964	362	t0309852	1	7.06381e-94	362
t0004967	362	t0404575	1	7.06381e-94	362
t0004963	362	t0287166	1	7.06381e-94	362
t0002476	722	t0113306	2	6.04901e-186	361
t0001595	1080	t0084410	3	1.94323e-277	360
t0002498	717	t0152960	2	1.22835e-184	358.5
t0005019	358	t0496322	1	7.85543e-93	358
t0000729	2141	t0059146	6	0	356.833
t0005033	356	t0234789	1	2.61948e-92	356
t0005035	356	t0360485	1	2.61948e-92	356
t0000303	4250	t0033491	12	0	354.167
t0002527	708	t0149047	2	2.77309e-182	354
t0005069	353	t0597447	1	1.59499e-91	353
t0005058	353	t0426652	1	1.59499e-91	353
t0005064	353	t0603088	1	1.59499e-91	353
t0000386	3526	t0037697	10	0	352.6
t0005072	352	t0280349	1	2.9125e-91	352
t0005076	352	t0237002	1	2.9125e-91	352
t0005079	352	t0394334	1	2.9125e-91	352
t0001639	1055	t0106285	3	6.70415e-271	351.667
t0005087	351	t0573583	1	5.31827e-91	351
t0005088	351	t0585509	1	5.31827e-91	351
t0005097	350	t0221679	1	9.71116e-91	350
t0005117	349	t0287816	1	1.77324e-90	349
t0001665	1044	t0107198	3	5.04378e-268	348
t0005141	347	t0217291	1	5.91224e-90	347
t0001676	1039	t0098227	3	1.02369e-266	346.333
t0005150	346	t0354032	1	1.07954e-89	346
t0005161	346	t0591309	1	1.07954e-89	346
t0005162	345	t0220479	1	1.97116e-89	345
t0000950	1723	t0066505	5	0	344.6
t0002611	687	t0173325	2	8.59504e-177	343.5
t0005224	342	t0435851	1	1.19991e-88	342
t0005227	342	t0537314	1	1.19991e-88	342
t0005239	341	t0302282	1	2.19088e-88	341
t0002637	680	t0162400	2	5.81433e-175	340
t0005251	340	t0372167	1	4.00021e-88	340
t0000162	6431	t0024454	19	0	338.474
t0002652	676	t0115226	2	6.46126e-174	338
t0005280	338	t0395458	1	1.33353e-87	338
t0001247	1351	t0077009	4	0	337.75
t0000553	2695	t0045085	8	0	336.875
t0001743	1010	t0099884	3	3.9135e-259	336.667
t0005316	336	t0439366	1	4.44535e-87	336
t0002667	671	t0118500	2	1.31083e-172	335.5
t0005323	335	t0337228	1	8.11619e-87	335
t0005331	335	t0395231	1	8.11619e-87	335
t0005332	335	t0458205	1	8.11619e-87	335
t0005339	334	t0591623	1	1.48182e-86	334
t0002693	667	t0113027	2	1.45645e-171	333.5
t0005357	333	t0501538	1	2.70541e-86	333
t0005363	333	t0360228	1	2.70541e-86	333
t0005359	333	t0569843	1	2.70541e-86	333
t0005362	333	t0337506	1	2.70541e-86	333
t0000990	1663	t0067600	5	0	332.6
t0000991	1660	t0068153	5	0	332
t0002703	664	t0112180	2	8.86315e-171	332
t0005370	332	t0261206	1	4.93933e-86	332
t0005388	332	t0536891	1	4.93933e-86	332
t0001778	993	t0111259	3	1.08874e-254	331
t0000225	5290	t0027786	16	0	330.625
t0005418	330	t0329297	1	1.64637e-85	330
t0005421	330	t0428150	1	1.64637e-85	330
t0005439	329	t0484728	1	3.00573e-85	329
t0001788	986	t0092743	3	7.35949e-253	328.667
t0001791	985	t0096884	3	1.34357e-252	328.333
t0005460	327	t0524848	1	1.00181e-84	327
t0000671	2287	t0049272	7	0	326.714
t0005481	326	t0353677	1	1.82892e-84	326
t0005485	326	t0475730	1	1.82892e-84	326
t0005482	326	t0398803	1	1.82892e-84	326
t0005501	325	t0570283	1	3.33889e-84	325
t0000275	4536	t0030109	14	0	324
t0005521	324	t0541307	1	6.09545e-84	324
t0005526	323	t0521683	1	1.11277e-83	323
t0002798	644	t0176899	2	1.4988e-165	322
t0005549	322	t0414366	1	2.03142e-83	322
t0000440	3214	t0039809	10	0	321.4
t0005561	321	t0316858	1	3.70844e-83	321
t0005562	321	t0351808	1	3.70844e-83	321
t0002816	641	t0141280	2	9.11795e-165	320.5
t0005579	320	t0502452	1	6.76984e-83	320
t0005582	320	t0343682	1	6.76984e-83	320
t0005584	320	t0427985	1	6.76984e-83	320
t0001840	959	t0087394	3	8.40425e-246	319.667
t0002830	638	t0162590	2	5.54666e-164	319
t0005589	319	t0356719	1	1.23584e-82	319
t0005614	318	t0345401	1	2.256e-82	318
t0001852	953	t0106688	3	3.10978e-244	317.667
t0005620	317	t0238071	1	4.11826e-82	317
t0001867	948	t0102079	3	6.30301e-243	316
t0002850	632	t0176327	2	2.05231e-162	316
t0005639	316	t0441572	1	7.51768e-82	316
t0005635	316	t0268372	1	7.51768e-82	316
t0002855	631	t0144160	2	3.74632e-162	315.5
t0005674	314	t0446849	1	2.50502e-81	314
t0005689	313	t0292020	1	4.57266e-81	313
t0005693	313	t0365939	1	4.57266e-81	313
t0005695	313	t0434366	1	4.57266e-81	313
t0002899	624	t0117935	2	2.52971e-160	312
t0005727	312	t0576434	1	8.34683e-81	312
t0001895	935	t0104361	3	1.57438e-239	311.667
t0005743	311	t0278049	1	1.5236e-80	311
t0005736	311	t0491073	1	1.5236e-80	311
t0001906	930	t0101590	3	3.19005e-238	310
t0001382	1238	t0075839	4	1.27191e-316	309.5
t0001077	1545	t0061295	5	0	309
t0005777	309	t0292865	1	5.07638e-80	309
t0005785	309	t0381402	1	5.07638e-80	309
t0005778	309	t0332751	1	5.07638e-80	309
t0005816	307	t0488815	1	1.6913e-79	307
t0005819	307	t0277874	1	1.6913e-79	307
t0001085	1534	t0063062	5	0	306.8
t0001398	1225	t0072341	4	3.17438e-313	306.25
t0001402	1224	t0073303	4	5.79394e-313	306
t0002962	612	t0143993	2	3.45978e-157	306
t0001939	917	t0089225	3	7.96178e-235	305.667
t0000164	6409	t0022787	21	0	305.19
t0005836	305	t0207419	1	5.63466e-79	305
t0005845	305	t0351368	1	5.63466e-79	305
t0002971	609	t0113420	2	2.10374e-156	304.5
t0000407	3346	t0036223	11	0	304.182
t0002975	608	t0167129	2	3.83973e-156	304
t0000742	2127	t0050609	7	0	303.857
t0002977	607	t0132414	2	7.00823e-156	303.5
t0005878	303	t0241147	1	1.87714e-78	303
t0005921	301	t0448585	1	6.25329e-78	301
t0005923	301	t0563509	1	6.25329e-78	301
t0001119	1502	t0066213	5	0	300.4
t0005936	300	t0411654	1	1.14132e-77	300
t0000421	3299	t0036038	11	0	299.909
t0001437	1198	t0076978	4	3.60381e-306	299.5
t0005947	299	t0239576	1	2.08305e-77	299
t0001125	1492	t0061468	5	0	298.4
t0000073	10134	t0016392	34	0	298.059
t0001994	892	t0090329	3	2.71254e-228	297.333
t0000081	9509	t0017094	32	0	297.156
t0001451	1186	t0079696	4	4.92136e-303	296.5
t0001455	1184	t0072116	4	1.63916e-302	296
t0006007	296	t0604983	1	1.26635e-76	296
t0006015	295	t0206054	1	2.31115e-76	295
t0006018	295	t0466785	1	2.31115e-76	295
t0003064	588	t0124998	2	6.45651e-151	294
t0000264	4702	t0027277	16	0	293.875
t0002016	880	t0085026	3	3.70302e-225	293.333
t0002019	880	t0096321	3	3.70302e-225	293.333
t0006068	293	t0537687	1	7.69773e-76	293
t0006060	293	t0210545	1	7.69773e-76	293
t0001471	1171	t0070793	4	4.0831e-299	292.75
t0001472	1170	t0082969	4	7.45144e-299	292.5
t0003087	585	t0170557	2	3.92436e-150	292.5
t0001475	1169	t0083590	4	1.35984e-298	292.25
t0006082	292	t0459975	1	1.40483e-75	292
t0003101	582	t0158761	2	2.38516e-149	291
t0006086	291	t0203120	1	2.56376e-75	291
t0000938	1744	t0053589	6	0	290.667
t0006096	290	t0189503	1	4.67872e-75	290
t0006099	290	t0294267	1	4.67872e-75	290
t0006100	290	t0405052	1	4.67872e-75	290
t0006105	290	t0565689	1	4.67872e-75	290
t0000001	38806	t0006074	134	0	289.597
t0006125	289	t0428686	1	8.53831e-75	289
t0000150	6639	t0021469	23	0	288.652
t0006138	288	t0519285	1	1.55816e-74	288
t0006140	288	t0597673	1	1.55816e-74	288
t0006146	288	t0354045	1	1.55816e-74	288
t0000948	1726	t0055202	6	0	287.667
t0002067	862	t0087110	3	1.86583e-220	287.333
t0006155	287	t0387581	1	2.84345e-74	287
t0006174	286	t0324140	1	5.1889e-74	286
t0006177	286	t0412187	1	5.1889e-74	286
t0002083	855	t0093628	3	1.25719e-218	285
t0006200	285	t0591440	1	9.46891e-74	285
t0001180	1422	t0064652	5	0	284.4
t0000963	1706	t0053700	6	0	284.333
t0002096	851	t0107057	3	1.39391e-217	283.667
t0003181	566	t0143168	2	3.60675e-145	283
t0006229	283	t0426316	1	3.15306e-73	283
t0006236	283	t0415228	1	3.15306e-73	283
t0001184	1414	t0064574	5	0	282.8
t0002105	847	t0088447	3	1.5454e-216	282.333
t0003192	564	t0166419	2	1.20093e-144	282
t0006253	282	t0533670	1	5.75362e-73	282
t0006285	281	t0613402	1	1.04989e-72	281
t0006290	281	t0315513	1	1.04989e-72	281
t0006292	281	t0439900	1	1.04989e-72	281
t0006297	281	t0568474	1	1.04989e-72	281
t0006289	281	t0303241	1	1.04989e-72	281
t0001545	1116	t0078801	4	9.50235e-285	279
t0003245	558	t0158330	2	4.43262e-143	279
t0006330	279	t0199400	1	3.4957e-72	279
t0006333	279	t0344643	1	3.4957e-72	279
t0002142	834	t0100422	3	3.84114e-213	278
t0006343	278	t0324099	1	6.37854e-72	278
t0006344	278	t0356069	1	6.37854e-72	278
t0006349	278	t0524523	1	6.37854e-72	278
t0006350	278	t0544069	1	6.37854e-72	278
t0006358	278	t0241215	1	6.37854e-72	278
t0006379	277	t0580442	1	1.16386e-71	277
t0006382	277	t0325327	1	1.16386e-71	277
t0006385	277	t0511135	1	1.16386e-71	277
t0006373	277	t0230834	1	1.16386e-71	277
t0006384	277	t0489016	1	1.16386e-71	277
t0002150	829	t0108263	3	7.76798e-212	276.333
t0002151	829	t0096921	3	7.76798e-212	276.333
t0006400	276	t0215786	1	2.12363e-71	276
t0006402	276	t0267245	1	2.12363e-71	276
t0006401	276	t0243022	1	2.12363e-71	276
t0006425	275	t0397895	1	3.87479e-71	275
t0000702	2197	t0045827	8	0	274.625
t0003308	548	t0175440	2	1.81277e-140	274
t0006445	274	t0256193	1	7.0699e-71	274
t0000249	4923	t0025569	18	0	273.5
t0003326	545	t0169290	2	1.10101e-139	272.5
t0006484	272	t0312387	1	2.35356e-70	272
t0006488	272	t0489691	1	2.35356e-70	272
t0000486	2991	t0036909	11	0	271.909
t0006500	271	t0495403	1	4.29411e-70	271
t0006496	271	t0387562	1	4.29411e-70	271
t0000430	3248	t0034155	12	0	270.667
t0001018	1621	t0053289	6	0	270.167
t0000190	5923	t0022040	22	0	269.227
t0006536	269	t0299447	1	1.42939e-69	269
t0006547	269	t0573322	1	1.42939e-69	269
t0000072	10217	t0015184	38	0	268.868
t0006559	268	t0242743	1	2.60784e-69	268
t0003383	535	t0141840	2	4.49886e-137	267.5
t0006593	267	t0457747	1	4.75779e-69	267
t0006585	267	t0597549	1	4.75779e-69	267
t0000623	2401	t0041103	9	0	266.778
t0002236	800	t0094986	3	2.9059e-204	266.667
t0002237	800	t0103088	3	2.9059e-204	266.667
t0003396	533	t0143161	2	1.49737e-136	266.5
t0006611	266	t0379494	1	8.68007e-69	266
t0006613	266	t0430952	1	8.68007e-69	266
t0006603	266	t0566457	1	8.68007e-69	266
t0003411	531	t0143947	2	4.98359e-136	265.5
t0003412	531	t0182215	2	4.98359e-136	265.5
t0001277	1325	t0068658	5	0	265
t0006621	265	t0268540	1	1.58356e-68	265
t0006632	265	t0567791	1	1.58356e-68	265
t0006635	265	t0197797	1	1.58356e-68	265
t0006637	265	t0219766	1	1.58356e-68	265
t0006639	265	t0295406	1	1.58356e-68	265
t0006644	265	t0375715	1	1.58356e-68	265
t0006650	265	t0611505	1	1.58356e-68	265
t0000448	3177	t0033848	12	0	264.75
t0006660	264	t0199601	1	2.88896e-68	264
t0006654	264	t0426144	1	2.88896e-68	264
t0003435	526	t0183857	2	1.00699e-134	263
t0006673	263	t0289172	1	5.27038e-68	263
t0006692	263	t0306824	1	5.27038e-68	263
t0006696	263	t0484605	1	5.27038e-68	263
t0001056	1573	t0058663	6	0	262.167
t0002280	786	t0096024	3	1.31401e-200	262
t0006706	262	t0350830	1	9.61471e-68	262
t0006720	262	t0416037	1	9.61471e-68	262
t0001298	1307	t0067072	5	0	261.4
t0006741	261	t0281872	1	1.75398e-67	261
t0006746	261	t0411103	1	1.75398e-67	261
t0003466	521	t0124069	2	2.03437e-133	260.5
t0002294	779	t0098301	3	8.83295e-199	259.667
t0006782	259	t0490372	1	5.83688e-67	259
t0000113	7764	t0017838	30	0	258.8
t0001319	1290	t0062852	5	0	258
t0006807	258	t0196643	1	1.06476e-66	258
t0006814	258	t0393036	1	1.06476e-66	258
t0006821	258	t0580554	1	1.06476e-66	258
t0006850	257	t0438583	1	1.94228e-66	257
t0006854	257	t0610715	1	1.94228e-66	257
t0002324	769	t0108474	3	3.60287e-196	256.333
t0006857	256	t0278688	1	3.54298e-66	256
t0006873	256	t0435558	1	3.54298e-66	256
t0000348	3836	t0029264	15	0	255.733
t0002329	767	t0107608	3	1.19876e-195	255.667
t0003544	511	t0126490	2	8.29854e-131	255.5
t0006883	255	t0218754	1	6.46277e-66	255
t0006886	255	t0373237	1	6.46277e-66	255
t0006888	255	t0405342	1	6.46277e-66	255
t0006893	255	t0605768	1	6.46277e-66	255
t0001095	1527	t0055375	6	0	254.5
t0003552	509	t0166091	2	2.76107e-130	254.5
t0006924	254	t0438988	1	1.17886e-65	254
t0006916	254	t0187239	1	1.17886e-65	254
t0006929	253	t0206768	1	2.1503e-65	253
t0006940	253	t0607397	1	2.1503e-65	253
t0002355	758	t0101975	3	2.67913e-193	252.667
t0003581	505	t0113475	2	3.05625e-129	252.5
t0006964	252	t0449389	1	3.92219e-65	252
t0006955	252	t0591658	1	3.92219e-65	252
t0006958	252	t0363037	1	3.92219e-65	252
t0006959	252	t0374838	1	3.92219e-65	252
t0006967	252	t0556443	1	3.92219e-65	252
t0003596	503	t0163247	2	1.01677e-128	251.5
t0006969	251	t0293963	1	7.15405e-65	251
t0001357	1253	t0065876	5	1.74907e-318	250.6
t0006989	250	t0369841	1	1.30487e-64	250
t0007002	250	t0511510	1	1.30487e-64	250
t0007005	250	t0594713	1	1.30487e-64	250
t0006993	250	t0535180	1	1.30487e-64	250
t0002390	748	t0090727	3	1.09162e-190	249.333
t0003638	498	t0167308	2	2.05236e-127	249
t0007021	249	t0602373	1	2.38001e-64	249
t0007014	249	t0388285	1	2.38001e-64	249
t0001369	1243	t0067235	5	7.12466e-316	248.6
t0000688	2235	t0042448	9	0	248.333
t0003655	496	t0177772	2	6.82717e-127	248
t0007030	248	t0262190	1	4.34092e-64	248
t0007036	248	t0573537	1	4.34092e-64	248
t0001781	991	t0075608	4	4.10635e-252	247.75
t0007076	247	t0383246	1	7.91732e-64	247
t0007080	247	t0515631	1	7.91732e-64	247
t0007101	246	t0320232	1	1.444e-63	246
t0002442	735	t0103422	3	2.69668e-187	245
t0002443	735	t0110220	3	2.69668e-187	245
t0003691	490	t0127943	2	2.51258e-125	245
t0007129	245	t0220398	1	2.6336e-63	245
t0000361	3670	t0028399	15	0	244.667
t0007164	244	t0613709	1	4.80314e-63	244
t0007141	244	t0309654	1	4.80314e-63	244
t0002453	731	t0091027	3	2.98315e-186	243.667
t0003706	487	t0124374	2	1.52409e-124	243.5
t0003709	486	t0134030	2	2.77951e-124	243
t0000969	1700	t0052327	7	0	242.857
t0003719	485	t0126043	2	5.06898e-124	242.5
t0003732	484	t0133690	2	9.24422e-124	242
t0007192	242	t0246860	1	1.59755e-62	242
t0007197	242	t0383443	1	1.59755e-62	242
t0000973	1692	t0049939	7	0	241.714
t0003745	482	t0158934	2	3.07438e-123	241
t0003749	482	t0166021	2	3.07438e-123	241
t0007224	241	t0310364	1	2.91345e-62	241
t0007229	241	t0454424	1	2.91345e-62	241
t0007230	241	t0485369	1	2.91345e-62	241
t0007255	240	t0470968	1	5.31318e-62	240
t0007243	240	t0542296	1	5.31318e-62	240
t0007257	240	t0528033	1	5.31318e-62	240
t0007260	239	t0259633	1	9.68932e-62	239
t0007264	239	t0353235	1	9.68932e-62	239
t0007272	239	t0542637	1	9.68932e-62	239
t0007266	239	t0439817	1	9.68932e-62	239
t0002501	716	t0096814	3	2.44763e-182	238.667
t0002507	714	t0095850	3	8.13917e-182	238
t0003801	476	t0158025	2	1.13066e-121	238
t0003809	475	t0134236	2	2.06181e-121	237.5
t0002514	712	t0109676	3	2.70647e-181	237.333
t0007326	237	t0458847	1	3.22218e-61	237
t0007332	237	t0215511	1	3.22218e-61	237
t0007341	237	t0550079	1	3.22218e-61	237
t0007376	236	t0608029	1	5.87579e-61	236
t0007348	236	t0234464	1	5.87579e-61	236
t0007377	235	t0234037	1	1.07146e-60	235
t0007384	235	t0490662	1	1.07146e-60	235
t0007378	235	t0242224	1	1.07146e-60	235
t0007386	235	t0603772	1	1.07146e-60	235
t0007387	235	t0223862	1	1.07146e-60	235
t0002562	703	t0097332	3	6.03232e-179	234.333
t0001193	1404	t0057695	6	0	234
t0001899	933	t0077119	4	5.59053e-237	233.25
t0001200	1398	t0053918	6	0	233
t0003885	466	t0137731	2	4.59536e-119	233
t0003890	466	t0145885	2	4.59536e-119	233
t0007442	233	t0299321	1	3.56263e-60	233
t0000309	4193	t0024729	18	0	232.944
t0002580	697	t0100013	3	2.21695e-177	232.333
t0007466	232	t0443451	1	6.49616e-60	232
t0002588	695	t0093123	3	7.37039e-177	231.667
t0007496	231	t0399180	1	1.1845e-59	231
t0007509	231	t0219465	1	1.1845e-59	231
t0007518	231	t0427456	1	1.1845e-59	231
t0007503	231	t0560117	1	1.1845e-59	231
t0003924	461	t0127410	2	9.26119e-118	230.5
t0000590	2532	t0036021	11	0	230.182
t0003931	460	t0144770	2	1.68859e-117	230
t0007535	230	t0327144	1	2.15976e-59	230
t0007534	230	t0274191	1	2.15976e-59	230
t0007549	230	t0374885	1	2.15976e-59	230
t0001220	1376	t0057532	6	0	229.333
t0007563	229	t0407886	1	3.93792e-59	229
t0007578	229	t0463391	1	3.93792e-59	229
t0007559	229	t0345697	1	3.93792e-59	229
t0002612	686	t0109465	3	1.64123e-174	228.667
t0001951	911	t0082864	4	3.06365e-231	227.75
t0000678	2276	t0037250	10	0	227.6
t0002625	682	t0092128	3	1.81347e-173	227.333
t0003978	454	t0162743	2	6.20274e-116	227
t0007623	227	t0303661	1	1.30908e-58	227
t0007643	227	t0595111	1	1.30908e-58	227
t0007631	227	t0208950	1	1.30908e-58	227
t0002636	680	t0098152	3	6.02787e-173	226.667
t0003991	453	t0149974	2	1.13087e-115	226.5
t0004001	452	t0173570	2	2.06175e-115	226
t0007668	226	t0495562	1	2.38674e-58	226
t0001053	1580	t0048382	7	0	225.714
t0000772	2031	t0041215	9	0	225.667
t0002648	677	t0102607	3	3.65279e-172	225.667
t0004019	451	t0168112	2	3.75887e-115	225.5
t0002655	676	t0104220	3	6.65946e-172	225.333
t0000904	1801	t0044309	8	0	225.125
t0004025	450	t0112552	2	6.85288e-115	225
t0007698	225	t0452079	1	4.35146e-58	225
t0007680	225	t0408591	1	4.35146e-58	225
t0007681	225	t0425409	1	4.35146e-58	225
t0004038	449	t0148046	2	1.24935e-114	224.5
t0007711	224	t0448165	1	7.93334e-58	224
t0007726	224	t0555005	1	7.93334e-58	224
t0000786	2009	t0042600	9	0	223.222
t0000604	2453	t0035644	11	0	223
t0007758	223	t0518647	1	1.44633e-57	223
t0007733	223	t0312257	1	1.44633e-57	223
t0007761	223	t0542658	1	1.44633e-57	223
t0001997	891	t0073666	4	5.04019e-226	222.75
t0004067	445	t0127993	2	1.38004e-113	222.5
t0000118	7562	t0016128	34	0	222.412
t0002007	886	t0072508	4	1.01476e-224	221.5
t0004098	442	t0114806	2	8.36083e-113	221
t0004104	442	t0171073	2	8.36083e-113	221
t0004106	442	t0161484	2	8.36083e-113	221
t0007808	221	t0448563	1	4.80694e-57	221
t0007789	221	t0255357	1	4.80694e-57	221
t0000928	1761	t0046606	8	0	220.125
t0004119	440	t0177297	2	2.77843e-112	220
t0007817	220	t0255559	1	8.76306e-57	220
t0007833	220	t0194411	1	8.76306e-57	220
t0007837	220	t0280452	1	8.76306e-57	220
t0002720	659	t0090317	3	1.80654e-167	219.667
t0004138	439	t0131440	2	5.06488e-112	219.5
t0007849	219	t0272780	1	1.59748e-56	219
t0007853	219	t0402634	1	1.59748e-56	219
t0007861	219	t0274692	1	1.59748e-56	219
t0002029	875	t0076596	4	7.49535e-222	218.75
t0000804	1966	t0040237	9	0	218.444
t0004164	436	t0164670	2	3.06795e-111	218
t0007878	218	t0306033	1	2.91208e-56	218
t0007883	218	t0418999	1	2.91208e-56	218
t0007889	218	t0225565	1	2.91208e-56	218
t0007875	218	t0229437	1	2.91208e-56	218
t0002756	651	t0098686	3	2.20224e-165	217
t0007904	217	t0223172	1	5.30841e-56	217
t0007921	217	t0279014	1	5.30841e-56	217
t0007929	217	t0566372	1	5.30841e-56	217
t0001101	1518	t0050610	7	0	216.857
t0002052	866	t0072356	4	1.66527e-219	216.5
t0002765	649	t0108806	3	7.31709e-165	216.333
t0007931	216	t0218545	1	9.67646e-56	216
t0004209	431	t0174341	2	6.17387e-110	215.5
t0001113	1508	t0051381	7	0	215.429
t0002071	860	t0078185	4	6.10722e-218	215
t0002782	645	t0091772	3	8.077e-164	215
t0002784	645	t0102808	3	8.077e-164	215
t0007973	215	t0570210	1	1.76384e-55	215
t0007967	215	t0420752	1	1.76384e-55	215
t0000645	2355	t0036931	11	0	214.091
t0007992	214	t0252880	1	3.21509e-55	214
t0008009	214	t0239812	1	3.21509e-55	214
t0007998	214	t0428526	1	3.21509e-55	214
t0007999	214	t0463127	1	3.21509e-55	214
t0008016	214	t0381673	1	3.21509e-55	214
t0008027	214	t0609455	1	3.21509e-55	214
t0002814	641	t0084955	3	8.9148e-163	213.667
t0008036	213	t0329599	1	5.86027e-55	213
t0008047	213	t0610974	1	5.86027e-55	213
t0008064	213	t0474863	1	5.86027e-55	213
t0002097	851	t0082001	4	1.35589e-215	212.75
t0002833	637	t0106064	3	9.83838e-162	212.333
t0002102	849	t0077733	4	4.50419e-215	212.25
t0000970	1697	t0046550	8	0	212.125
t0002836	636	t0101148	3	1.79316e-161	212
t0008093	212	t0286709	1	1.06815e-54	212
t0004292	423	t0178873	2	7.5206e-108	211.5
t0002844	634	t0094883	3	5.95661e-161	211.333
t0008137	211	t0288432	1	1.94688e-54	211
t0008145	211	t0347955	1	1.94688e-54	211
t0008123	211	t0442088	1	1.94688e-54	211
t0008132	211	t0607829	1	1.94688e-54	211
t0004314	420	t0130283	2	4.55313e-107	210
t0008188	210	t0307427	1	3.54842e-54	210
t0000308	4194	t0023495	20	0	209.7
t0004321	419	t0112604	2	8.29824e-107	209.5
t0002137	836	t0079848	4	1.10263e-211	209
t0004327	418	t0129913	2	1.51237e-106	209
t0004333	418	t0136136	2	1.51237e-106	209
t0008209	209	t0347460	1	6.46727e-54	209
t0008206	209	t0314638	1	6.46727e-54	209
t0008207	209	t0333514	1	6.46727e-54	209
t0008234	209	t0572517	1	6.46727e-54	209
t0004344	417	t0150293	2	2.75628e-106	208.5
t0004345	417	t0167024	2	2.75628e-106	208.5
t0002894	625	t0089814	3	1.32145e-158	208.333
t0001672	1041	t0068022	5	3.47203e-263	208.2
t0004349	416	t0115666	2	5.02325e-106	208
t0008259	208	t0480734	1	1.17869e-53	208
t0008236	208	t0198667	1	1.17869e-53	208
t0008268	208	t0614643	1	1.17869e-53	208
t0002902	623	t0088221	3	4.38895e-158	207.667
t0001680	1037	t0063924	5	3.82983e-262	207.4
t0004371	414	t0114300	2	1.66837e-105	207
t0008269	207	t0188365	1	2.14816e-53	207
t0008291	207	t0495787	1	2.14816e-53	207
t0000416	3309	t0027158	16	0	206.812
t0002922	620	t0109169	3	2.65644e-157	206.667
t0002920	620	t0093908	3	2.65644e-157	206.667
t0002925	619	t0090645	3	4.84105e-157	206.333
t0001697	1030	t0065670	5	2.5565e-260	206
t0008316	206	t0195172	1	3.91492e-53	206
t0008312	206	t0553909	1	3.91492e-53	206
t0002176	823	t0078956	4	2.69669e-208	205.75
t0004408	410	t0178158	2	1.84013e-104	205
t0004413	410	t0145927	2	1.84013e-104	205
t0004404	410	t0130137	2	1.84013e-104	205
t0004411	410	t0123098	2	1.84013e-104	205
t0008348	205	t0484326	1	7.13462e-53	205
t0008354	205	t0601488	1	7.13462e-53	205
t0008366	205	t0414855	1	7.13462e-53	205
t0001707	1024	t0064136	5	9.36255e-259	204.8
t0004431	408	t0180374	2	6.11079e-104	204
t0004427	408	t0121804	2	6.11079e-104	204
t0008388	204	t0601426	1	1.3002e-52	204
t0008397	204	t0452313	1	1.3002e-52	204
t0008403	204	t0578104	1	1.3002e-52	204
t0008374	204	t0243643	1	1.3002e-52	204
t0008377	204	t0336935	1	1.3002e-52	204
t0008387	204	t0582885	1	1.3002e-52	204
t0004446	407	t0172009	2	1.11356e-103	203.5
t0008423	203	t0368573	1	2.36939e-52	203
t0008429	203	t0608878	1	2.36939e-52	203
t0000477	3033	t0029359	15	0	202.2
t0002987	606	t0094871	3	1.18289e-153	202
t0008443	202	t0451599	1	4.31771e-52	202
t0008452	202	t0263134	1	4.31771e-52	202
t0002989	605	t0094817	3	2.15544e-153	201.667
t0004478	403	t0115531	2	1.2278e-102	201.5
t0008470	201	t0209515	1	7.86792e-52	201
t0008471	201	t0213104	1	7.86792e-52	201
t0008478	201	t0345226	1	7.86792e-52	201
t0008483	201	t0522221	1	7.86792e-52	201
t0008502	201	t0594534	1	7.86792e-52	201
t0002229	803	t0082629	4	4.39451e-203	200.75
t0008530	200	t0418069	1	1.43369e-51	200
t0008525	200	t0389573	1	1.43369e-51	200
t0004513	399	t0164784	2	1.35349e-101	199.5
t0001770	996	t0064806	5	1.8531e-251	199.2
t0008546	199	t0369437	1	2.61242e-51	199
t0008550	199	t0486935	1	2.61242e-51	199
t0008553	199	t0523068	1	2.61242e-51	199
t0008556	199	t0564470	1	2.61242e-51	199
t0008560	199	t0243787	1	2.61242e-51	199
t0008562	199	t0294693	1	2.61242e-51	199
t0008565	199	t0406750	1	2.61242e-51	199
t0008569	199	t0491209	1	2.61242e-51	199
t0003031	595	t0099911	3	8.69477e-151	198.333
t0001783	990	t0067451	5	6.77982e-250	198
t0004541	396	t0127945	2	8.18742e-101	198
t0004544	396	t0150117	2	8.18742e-101	198
t0008589	198	t0415051	1	4.76012e-51	198
t0000273	4545	t0021347	23	0	197.609
t0002268	790	t0076261	4	1.072e-199	197.5
t0004557	395	t0120336	2	1.49176e-100	197.5
t0001787	987	t0067009	5	4.1006e-249	197.4
t0004568	394	t0143859	2	2.71798e-100	197
t0008617	197	t0239330	1	8.67327e-51	197
t0008623	197	t0370780	1	8.67327e-51	197
t0008630	197	t0488874	1	8.67327e-51	197
t0008624	197	t0408018	1	8.67327e-51	197
t0008627	197	t0465313	1	8.67327e-51	197
t0008666	196	t0459379	1	1.58029e-50	196
t0008679	196	t0302587	1	1.58029e-50	196
t0008660	196	t0321211	1	1.58029e-50	196
t0008661	196	t0368150	1	1.58029e-50	196
t0008669	196	t0566817	1	1.58029e-50	196
t0004610	390	t0131836	2	2.99489e-99	195
t0008719	195	t0575365	1	2.87925e-50	195
t0008730	195	t0351959	1	2.87925e-50	195
t0008697	195	t0233749	1	2.87925e-50	195
t0008723	195	t0217300	1	2.87925e-50	195
t0008732	195	t0362051	1	2.87925e-50	195
t0001811	974	t0061227	5	9.99264e-246	194.8
t0000499	2918	t0029015	15	0	194.533
t0000655	2332	t0034447	12	0	194.333
t0000464	3108	t0027480	16	0	194.25
t0000816	1941	t0038398	10	0	194.1
t0008746	194	t0354258	1	5.24579e-50	194
t0008753	194	t0537151	1	5.24579e-50	194
t0008755	194	t0546237	1	5.24579e-50	194
t0008770	194	t0421562	1	5.24579e-50	194
t0008744	194	t0318176	1	5.24579e-50	194
t0008750	194	t0419820	1	5.24579e-50	194
t0008794	193	t0548183	1	9.55723e-50	193
t0008804	193	t0322396	1	9.55723e-50	193
t0008785	193	t0310128	1	9.55723e-50	193
t0000365	3655	t0024254	19	0	192.368
t0003124	577	t0095725	3	4.2524e-146	192.333
t0001255	1344	t0050204	7	0	192
t0004691	384	t0153079	2	1.095e-97	192
t0008819	192	t0257247	1	1.74117e-49	192
t0008816	192	t0219883	1	1.74117e-49	192
t0008850	192	t0447216	1	1.74117e-49	192
t0008854	192	t0568983	1	1.74117e-49	192
t0003144	573	t0086743	3	4.68328e-145	191
t0004714	382	t0140697	2	3.63394e-97	191
t0008868	191	t0369026	1	3.17204e-49	191
t0008874	191	t0494672	1	3.17204e-49	191
t0008890	191	t0451653	1	3.17204e-49	191
t0008894	191	t0524558	1	3.17204e-49	191
t0003149	572	t0091173	3	8.53139e-145	190.667
t0008905	190	t0546526	1	5.77864e-49	190
t0008906	190	t0549337	1	5.77864e-49	190
t0008920	190	t0367776	1	5.77864e-49	190
t0008909	190	t0572719	1	5.77864e-49	190
t0001862	949	t0066119	5	3.24888e-239	189.8
t0001515	1135	t0053399	6	9.28686e-286	189.167
t0008932	189	t0293498	1	1.05269e-48	189
t0008941	189	t0581503	1	1.05269e-48	189
t0008957	189	t0495263	1	1.05269e-48	189
t0008963	189	t0543739	1	1.05269e-48	189
t0008961	189	t0532567	1	1.05269e-48	189
t0003183	566	t0104677	3	3.11712e-143	188.667
t0004780	377	t0116217	2	7.28933e-96	188.5
t0008973	188	t0223479	1	1.91762e-48	188
t0008982	188	t0523482	1	1.91762e-48	188
t0008983	188	t0555028	1	1.91762e-48	188
t0009007	188	t0558215	1	1.91762e-48	188
t0004804	375	t0139632	2	2.41863e-95	187.5
t0004811	375	t0140160	2	2.41863e-95	187.5
t0009019	187	t0522731	1	3.49313e-48	187
t0009020	187	t0546249	1	3.49313e-48	187
t0009034	187	t0447128	1	3.49313e-48	187
t0009036	187	t0485295	1	3.49313e-48	187
t0009040	187	t0493434	1	3.49313e-48	187
t0004846	373	t0164343	2	8.02467e-95	186.5
t0004836	373	t0143430	2	8.02467e-95	186.5
t0003233	559	t0103542	3	2.07376e-141	186.333
t0003239	558	t0083875	3	3.77722e-141	186
t0004848	372	t0113106	2	1.46166e-94	186
t0004856	372	t0119094	2	1.46166e-94	186
t0004858	372	t0140235	2	1.46166e-94	186
t0004847	372	t0112960	2	1.46166e-94	186
t0009047	186	t0229270	1	6.36288e-48	186
t0009074	186	t0384979	1	6.36288e-48	186
t0009080	186	t0443596	1	6.36288e-48	186
t0009086	186	t0532085	1	6.36288e-48	186
t0009059	186	t0517312	1	6.36288e-48	186
t0003257	556	t0110265	3	1.2531e-140	185.333
t0002419	740	t0077205	4	1.13171e-186	185
t0004880	370	t0141975	2	4.84918e-94	185
t0009098	185	t0480507	1	1.15899e-47	185
t0009100	185	t0500089	1	1.15899e-47	185
t0009105	185	t0608450	1	1.15899e-47	185
t0003267	554	t0103074	3	4.15704e-140	184.667
t0000077	9779	t0011841	53	0	184.509
t0003281	552	t0084514	3	1.379e-139	184
t0004903	368	t0149210	2	1.60866e-93	184
t0009122	184	t0205690	1	2.11104e-47	184
t0009138	184	t0578780	1	2.11104e-47	184
t0009141	184	t0239024	1	2.11104e-47	184
t0009151	184	t0419287	1	2.11104e-47	184
t0000537	2759	t0028706	15	0	183.933
t0000783	2019	t0036855	11	0	183.545
t0002447	734	t0083188	4	4.13098e-185	183.5
t0004906	367	t0127299	2	2.9299e-93	183.5
t0009161	183	t0192431	1	3.84502e-47	183
t0009170	183	t0345366	1	3.84502e-47	183
t0009178	183	t0526905	1	3.84502e-47	183
t0009181	183	t0553906	1	3.84502e-47	183
t0009165	183	t0260086	1	3.84502e-47	183
t0009192	183	t0416563	1	3.84502e-47	183
t0004941	364	t0168866	2	1.77003e-92	182
t0009213	182	t0485772	1	7.00307e-47	182
t0009203	182	t0280153	1	7.00307e-47	182
t0000467	3086	t0026164	17	0	181.529
t0004958	363	t0121658	2	3.22362e-92	181.5
t0000468	3078	t0025840	17	0	181.059
t0002469	724	t0080764	4	1.65829e-182	181
t0003338	543	t0099280	3	3.03995e-137	181
t0004975	362	t0171226	2	5.87084e-92	181
t0000312	4152	t0021583	23	0	180.522
t0004984	361	t0112585	2	1.06918e-91	180.5
t0004987	361	t0154675	2	1.06918e-91	180.5
t0004988	361	t0176052	2	1.06918e-91	180.5
t0000207	5588	t0017356	31	0	180.258
t0004989	360	t0123428	2	1.94713e-91	180
t0009276	180	t0189198	1	2.3229e-46	180
t0009354	179	t0363286	1	4.2304e-46	179
t0009357	179	t0405700	1	4.2304e-46	179
t0005023	357	t0130709	2	1.17594e-90	178.5
t0005026	357	t0134917	2	1.17594e-90	178.5
t0002000	891	t0068335	5	4.10978e-224	178.2
t0005040	356	t0174196	2	2.14143e-90	178
t0009393	178	t0293368	1	7.70406e-46	178
t0009397	178	t0377208	1	7.70406e-46	178
t0009390	178	t0218224	1	7.70406e-46	178
t0009404	178	t0465340	1	7.70406e-46	178
t0000071	10293	t0011159	58	0	177.466
t0009423	177	t0411205	1	1.40296e-45	177
t0009424	177	t0431488	1	1.40296e-45	177
t0009444	177	t0323971	1	1.40296e-45	177
t0009449	177	t0352791	1	1.40296e-45	177
t0009453	177	t0408154	1	1.40296e-45	177
t0009450	177	t0387309	1	1.40296e-45	177
t0002542	706	t0070584	4	8.0413e-178	176.5
t0009504	176	t0548628	1	2.5548e-45	176
t0009475	176	t0321375	1	2.5548e-45	176
t0009484	176	t0517867	1	2.5548e-45	176
t0009489	176	t0581202	1	2.5548e-45	176
t0009492	176	t0300856	1	2.5548e-45	176
t0009494	176	t0339302	1	2.5548e-45	176
t0005089	351	t0184223	2	4.28734e-89	175.5
t0005090	351	t0124462	2	4.28734e-89	175.5
t0002026	876	t0065897	5	3.29681e-220	175.2
t0009517	175	t0395861	1	4.65216e-45	175
t0009531	175	t0236140	1	4.65216e-45	175
t0009535	175	t0313477	1	4.65216e-45	175
t0009537	175	t0376909	1	4.65216e-45	175
t0009538	175	t0415840	1	4.65216e-45	175
t0001405	1223	t0052024	7	8.78926e-307	174.714
t0005120	349	t0180971	2	1.42146e-88	174.5
t0002583	696	t0080591	4	3.22103e-175	174
t0009558	174	t0442192	1	8.47109e-45	174
t0005139	347	t0155243	2	4.7125e-88	173.5
t0005145	347	t0155818	2	4.7125e-88	173.5
t0003477	520	t0088272	3	2.94902e-131	173.333
t0009596	173	t0481118	1	1.54245e-44	173
t0009597	173	t0509597	1	1.54245e-44	173
t0009603	173	t0197626	1	1.54245e-44	173
t0009631	173	t0511378	1	1.54245e-44	173
t0009595	173	t0446065	1	1.54245e-44	173
t0009628	173	t0462089	1	1.54245e-44	173
t0009630	173	t0498704	1	1.54245e-44	173
t0003491	518	t0095479	3	9.77583e-131	172.667
t0000837	1896	t0036886	11	0	172.364
t0003494	517	t0090802	3	1.77986e-130	172.333
t0001691	1033	t0059024	6	3.32732e-259	172.167
t0005187	344	t0149809	2	2.8443e-87	172
t0005191	344	t0143272	2	2.8443e-87	172
t0009655	172	t0501324	1	2.80845e-44	172
t0009672	172	t0291055	1	2.80845e-44	172
t0009679	172	t0422350	1	2.80845e-44	172
t0009686	172	t0476945	1	2.80845e-44	172
t0009696	172	t0610045	1	2.80845e-44	172
t0009647	172	t0322496	1	2.80845e-44	172
t0002615	686	t0078187	4	1.28917e-172	171.5
t0005196	343	t0136743	2	5.17847e-87	171.5
t0005212	342	t0153931	2	9.42804e-87	171
t0009724	171	t0613935	1	5.1134e-44	171
t0009698	171	t0212005	1	5.1134e-44	171
t0009702	171	t0283964	1	5.1134e-44	171
t0005234	341	t0181281	2	1.71646e-86	170.5
t0001710	1022	t0054851	6	2.42307e-256	170.333
t0002632	681	t0074703	4	2.57829e-171	170.25
t0002099	850	t0065210	5	1.92311e-213	170
t0009764	170	t0327537	1	9.30975e-44	170
t0009767	170	t0407576	1	9.30975e-44	170
t0009768	170	t0428178	1	9.30975e-44	170
t0009782	170	t0309350	1	9.30975e-44	170
t0009786	170	t0339268	1	9.30975e-44	170
t0009787	170	t0364656	1	9.30975e-44	170
t0009770	170	t0445790	1	9.30975e-44	170
t0009790	170	t0449863	1	9.30975e-44	170
t0005263	339	t0121085	2	5.68901e-86	169.5
t0003567	507	t0101415	3	7.11918e-128	169
t0009808	169	t0320073	1	1.69493e-43	169
t0009841	169	t0251929	1	1.69493e-43	169
t0009797	169	t0209711	1	1.69493e-43	169
t0009816	169	t0396902	1	1.69493e-43	169
t0005285	337	t0129289	2	1.88543e-85	168.5
t0005295	337	t0140339	2	1.88543e-85	168.5
t0003588	505	t0105789	3	2.35928e-127	168.333
t0003594	504	t0105604	3	4.29484e-127	168
t0005306	336	t0139511	2	3.4323e-85	168
t0005311	336	t0161357	2	3.4323e-85	168
t0005318	336	t0160087	2	3.4323e-85	168
t0009879	168	t0186275	1	3.08568e-43	168
t0009890	168	t0324030	1	3.08568e-43	168
t0009901	168	t0476162	1	3.08568e-43	168
t0009869	168	t0464234	1	3.08568e-43	168
t0009884	168	t0254831	1	3.08568e-43	168
t0009888	168	t0300416	1	3.08568e-43	168
t0009902	168	t0502774	1	3.08568e-43	168
t0003617	501	t0104858	3	2.59071e-126	167
t0005344	334	t0125591	2	1.1374e-84	167
t0005334	334	t0118734	2	1.1374e-84	167
t0009909	167	t0220995	1	5.6174e-43	167
t0009949	167	t0355643	1	5.6174e-43	167
t0009959	167	t0576761	1	5.6174e-43	167
t0009913	167	t0313201	1	5.6174e-43	167
t0009958	167	t0552971	1	5.6174e-43	167
t0000413	3326	t0023715	20	0	166.3
t0009986	166	t0330665	1	1.0226e-42	166
t0009987	166	t0340880	1	1.0226e-42	166
t0009997	166	t0489373	1	1.0226e-42	166
t0010001	166	t0512595	1	1.0226e-42	166
t0005395	331	t0141127	2	6.86039e-84	165.5
t0005398	331	t0155987	2	6.86039e-84	165.5
t0000068	10415	t0010532	63	0	165.317
t0000315	4129	t0020171	25	0	165.16
t0005412	330	t0135715	2	1.24876e-83	165
t0010023	165	t0583919	1	1.86148e-42	165
t0010036	165	t0374562	1	1.86148e-42	165
t0010037	165	t0400229	1	1.86148e-42	165
t0010049	165	t0603853	1	1.86148e-42	165
t0010031	165	t0277251	1	1.86148e-42	165
t0010032	165	t0298065	1	1.86148e-42	165
t0010033	165	t0321582	1	1.86148e-42	165
t0002170	824	t0066138	5	1.11662e-206	164.8
t0002719	659	t0071470	4	1.36368e-165	164.75
t0002717	659	t0068921	4	1.36368e-165	164.75
t0005454	328	t0179687	2	4.13727e-83	164
t0005444	328	t0121271	2	4.13727e-83	164
t0010065	164	t0460228	1	3.38842e-42	164
t0010099	164	t0545475	1	3.38842e-42	164
t0010071	164	t0565474	1	3.38842e-42	164
t0010084	164	t0387680	1	3.38842e-42	164
t0010090	164	t0442762	1	3.38842e-42	164
t0005458	327	t0133047	2	7.53044e-83	163.5
t0001503	1143	t0050686	7	5.72333e-286	163.286
t0002745	653	t0082877	4	4.958e-164	163.25
t0002746	653	t0071438	4	4.958e-164	163.25
t0001805	978	t0058029	6	6.76706e-245	163
t0010107	163	t0260024	1	6.16767e-42	163
t0010126	163	t0468226	1	6.16767e-42	163
t0010136	163	t0198209	1	6.16767e-42	163
t0010149	163	t0380608	1	6.16767e-42	163
t0010153	163	t0460384	1	6.16767e-42	163
t0000378	3579	t0022127	22	0	162.682
t0005502	325	t0182479	2	2.49464e-82	162.5
t0005490	325	t0118351	2	2.49464e-82	162.5
t0005496	325	t0126877	2	2.49464e-82	162.5
t0005507	324	t0162522	2	4.54036e-82	162
t0005511	324	t0123157	2	4.54036e-82	162
t0010198	162	t0317021	1	1.12261e-41	162
t0001818	970	t0054633	6	8.14612e-243	161.667
t0000918	1778	t0035502	11	0	161.636
t0005523	323	t0131147	2	8.26351e-82	161.5
t0005536	322	t0135592	2	1.50394e-81	161
t0005539	322	t0161552	2	1.50394e-81	161
t0005552	322	t0157915	2	1.50394e-81	161
t0010234	161	t0512291	1	2.04325e-41	161
t0010252	161	t0384163	1	2.04325e-41	161
t0010259	161	t0489191	1	2.04325e-41	161
t0010223	161	t0432592	1	2.04325e-41	161
t0001158	1448	t0040328	9	0	160.889
t0001326	1286	t0045628	8	2.57408e-321	160.75
t0005571	321	t0131726	2	2.73708e-81	160.5
t0005570	321	t0125083	2	2.73708e-81	160.5
t0002817	641	t0079738	4	6.54729e-161	160.25
t0005576	320	t0131727	2	4.98124e-81	160
t0005583	320	t0140205	2	4.98124e-81	160
t0010312	160	t0393567	1	3.71874e-41	160
t0010319	160	t0498654	1	3.71874e-41	160
t0010327	160	t0588394	1	3.71874e-41	160
t0010329	160	t0594797	1	3.71874e-41	160
t0010284	160	t0428662	1	3.71874e-41	160
t0010292	160	t0534516	1	3.71874e-41	160
t0010330	160	t0614175	1	3.71874e-41	160
t0003765	479	t0099536	3	1.36596e-120	159.667
t0000759	2073	t0032519	13	0	159.462
t0003773	478	t0094021	3	2.48581e-120	159.333
t0010353	159	t0405130	1	6.76792e-41	159
t0010370	159	t0205266	1	6.76792e-41	159
t0010332	159	t0203971	1	6.76792e-41	159
t0010350	159	t0388662	1	6.76792e-41	159
t0010357	159	t0442454	1	6.76792e-41	159
t0010361	159	t0534773	1	6.76792e-41	159
t0010369	159	t0609242	1	6.76792e-41	159
t0003795	476	t0106593	3	8.2321e-120	158.667
t0003800	476	t0093562	3	8.2321e-120	158.667
t0005628	317	t0137619	2	3.00217e-80	158.5
t0005641	316	t0178836	2	5.46326e-80	158
t0010439	158	t0406065	1	1.23168e-40	158
t0003833	473	t0103838	3	4.96057e-119	157.667
t0003838	472	t0100265	3	9.02665e-119	157.333
t0005671	314	t0120764	2	1.80908e-79	157
t0010506	157	t0608711	1	2.24142e-40	157
t0010453	157	t0245644	1	2.24142e-40	157
t0010457	157	t0316445	1	2.24142e-40	157
t0000949	1724	t0036362	11	0	156.727
t0002885	626	t0083561	4	5.20186e-157	156.5
t0003863	469	t0104661	3	5.43849e-118	156.333
t0003864	469	t0090282	3	5.43849e-118	156.333
t0002895	625	t0073598	4	9.46522e-157	156.25
t0005713	312	t0124191	2	5.99005e-79	156
t0005729	312	t0184415	2	5.99005e-79	156
t0010521	156	t0403484	1	4.07881e-40	156
t0010522	156	t0423789	1	4.07881e-40	156
t0010527	156	t0447625	1	4.07881e-40	156
t0010531	156	t0477008	1	4.07881e-40	156
t0010562	156	t0612802	1	4.07881e-40	156
t0001893	935	t0052476	6	1.02627e-233	155.833
t0001897	934	t0055256	6	1.86731e-233	155.667
t0005731	311	t0124977	2	1.08994e-78	155.5
t0005742	311	t0121806	2	1.08994e-78	155.5
t0003888	466	t0109192	3	3.27626e-117	155.333
t0001577	1087	t0050447	7	2.08246e-271	155.286
t0002918	620	t0079472	4	1.88766e-155	155
t0003894	465	t0084814	3	5.96119e-117	155
t0005760	310	t0128436	2	1.9832e-78	155
t0005764	310	t0184373	2	1.9832e-78	155
t0010577	155	t0420649	1	7.42207e-40	155
t0010585	155	t0516768	1	7.42207e-40	155
t0010594	155	t0614162	1	7.42207e-40	155
t0010606	155	t0298269	1	7.42207e-40	155
t0010565	155	t0193831	1	7.42207e-40	155
t0010573	155	t0359276	1	7.42207e-40	155
t0010616	155	t0532125	1	7.42207e-40	155
t0002309	774	t0067997	5	1.12016e-193	154.8
t0002307	774	t0062840	5	1.12016e-193	154.8
t0005789	309	t0175905	2	3.60847e-78	154.5
t0002312	772	t0064291	5	3.70815e-193	154.4
t0003908	463	t0103705	3	1.97344e-116	154.333
t0001918	925	t0056516	6	4.08034e-231	154.167
t0005804	308	t0134144	2	6.56552e-78	154
t0005799	308	t0152380	2	6.56552e-78	154
t0010650	154	t0253913	1	1.35052e-39	154
t0010662	154	t0423982	1	1.35052e-39	154
t0010624	154	t0235099	1	1.35052e-39	154
t0010626	154	t0260940	1	1.35052e-39	154
t0010669	154	t0470120	1	1.35052e-39	154
t0003938	459	t0110957	3	2.1624e-115	153
t0010684	153	t0233607	1	2.45729e-39	153
t0010729	153	t0296343	1	2.45729e-39	153
t0010689	153	t0279631	1	2.45729e-39	153
t0010694	153	t0324945	1	2.45729e-39	153
t0010715	153	t0579946	1	2.45729e-39	153
t0010724	153	t0245750	1	2.45729e-39	153
t0010727	153	t0284282	1	2.45729e-39	153
t0010728	153	t0287373	1	2.45729e-39	153
t0002337	764	t0060796	5	4.45163e-191	152.8
t0000886	1832	t0032968	12	0	152.667
t0005854	305	t0168790	2	3.95416e-77	152.5
t0005863	304	t0169573	2	7.19391e-77	152
t0010744	152	t0240551	1	4.47091e-39	152
t0010753	152	t0355540	1	4.47091e-39	152
t0010755	152	t0400579	1	4.47091e-39	152
t0010765	152	t0481698	1	4.47091e-39	152
t0010774	152	t0206055	1	4.47091e-39	152
t0010779	152	t0318965	1	4.47091e-39	152
t0010780	152	t0326305	1	4.47091e-39	152
t0010754	152	t0390580	1	4.47091e-39	152
t0002983	606	t0069084	4	8.21771e-152	151.5
t0001960	906	t0054828	6	3.53829e-226	151
t0003990	453	t0095863	3	7.84009e-114	151
t0005890	302	t0121094	2	2.38099e-76	151
t0005893	302	t0134087	2	2.38099e-76	151
t0005898	302	t0156470	2	2.38099e-76	151
t0005905	302	t0126961	2	2.38099e-76	151
t0005906	302	t0135015	2	2.38099e-76	151
t0005909	302	t0163614	2	2.38099e-76	151
t0010808	151	t0245471	1	8.13425e-39	151
t0010822	151	t0494031	1	8.13425e-39	151
t0010829	151	t0263925	1	8.13425e-39	151
t0010839	151	t0368925	1	8.13425e-39	151
t0010819	151	t0464222	1	8.13425e-39	151
t0010820	151	t0469942	1	8.13425e-39	151
t0010827	151	t0230625	1	8.13425e-39	151
t0010838	151	t0356143	1	8.13425e-39	151
t0010844	151	t0405049	1	8.13425e-39	151
t0010846	151	t0413758	1	8.13425e-39	151
t0001112	1508	t0038051	10	0	150.8
t0000900	1806	t0033764	12	0	150.5
t0004013	451	t0105748	3	2.59457e-113	150.333
t0003002	601	t0076035	4	1.63724e-150	150.25
t0004022	450	t0100628	3	4.71986e-113	150
t0005934	300	t0148451	2	7.87978e-76	150
t0005942	300	t0183140	2	7.87978e-76	150
t0005941	300	t0182817	2	7.87978e-76	150
t0010866	150	t0204768	1	1.47986e-38	150
t0010870	150	t0322474	1	1.47986e-38	150
t0010906	150	t0304486	1	1.47986e-38	150
t0010888	150	t0520745	1	1.47986e-38	150
t0010897	150	t0198956	1	1.47986e-38	150
t0010912	150	t0374009	1	1.47986e-38	150
t0010926	150	t0512091	1	1.47986e-38	150
t0010928	150	t0531362	1	1.47986e-38	150
t0002389	749	t0067040	5	3.52114e-187	149.8
t0001980	897	t0054601	6	7.7179e-224	149.5
t0004042	448	t0090520	3	1.56184e-112	149.333
t0004052	447	t0103766	3	2.84107e-112	149
t0010964	149	t0527277	1	2.69219e-38	149
t0010972	149	t0237110	1	2.69219e-38	149
t0010983	149	t0398081	1	2.69219e-38	149
t0010945	149	t0278705	1	2.69219e-38	149
t0010953	149	t0435357	1	2.69219e-38	149
t0010954	149	t0438770	1	2.69219e-38	149
t0010988	149	t0500363	1	2.69219e-38	149
t0010992	149	t0579228	1	2.69219e-38	149
t0004060	446	t0092220	3	5.16796e-112	148.667
t0001011	1634	t0036835	11	0	148.545
t0005989	297	t0120769	2	4.74326e-75	148.5
t0005994	297	t0144131	2	4.74326e-75	148.5
t0002412	742	t0059670	5	2.32025e-185	148.4
t0004080	444	t0097446	3	1.70992e-111	148
t0004082	444	t0104116	3	1.70992e-111	148
t0006005	296	t0161710	2	8.62805e-75	148
t0011011	148	t0339790	1	4.89746e-38	148
t0011035	148	t0550223	1	4.89746e-38	148
t0011042	148	t0202555	1	4.89746e-38	148
t0011057	148	t0517773	1	4.89746e-38	148
t0011058	148	t0540385	1	4.89746e-38	148
t0011000	148	t0217464	1	4.89746e-38	148
t0011008	148	t0311537	1	4.89746e-38	148
t0011013	148	t0354725	1	4.89746e-38	148
t0011024	148	t0470463	1	4.89746e-38	148
t0011051	148	t0360261	1	4.89746e-38	148
t0011059	148	t0542397	1	4.89746e-38	148
t0000302	4280	t0018292	29	0	147.586
t0001142	1475	t0038957	10	0	147.5
t0000349	3833	t0019564	26	0	147.423
t0000828	1916	t0032610	13	0	147.385
t0002013	883	t0055804	6	3.34942e-220	147.167
t0002015	882	t0053515	6	6.09207e-220	147
t0011066	147	t0209866	1	8.90876e-38	147
t0011069	147	t0225742	1	8.90876e-38	147
t0011109	147	t0343815	1	8.90876e-38	147
t0011077	147	t0304120	1	8.90876e-38	147
t0011100	147	t0210595	1	8.90876e-38	147
t0011111	147	t0396465	1	8.90876e-38	147
t0002449	733	t0064172	5	5.05567e-183	146.6
t0006062	293	t0134867	2	5.1923e-74	146.5
t0006063	293	t0138347	2	5.1923e-74	146.5
t0000047	12414	t0008456	85	0	146.047
t0006084	292	t0164417	2	9.44401e-74	146
t0011132	146	t0275458	1	1.62048e-37	146
t0011176	146	t0560728	1	1.62048e-37	146
t0011134	146	t0327624	1	1.62048e-37	146
t0011156	146	t0232495	1	1.62048e-37	146
t0011170	146	t0436243	1	1.62048e-37	146
t0011173	146	t0509572	1	1.62048e-37	146
t0000654	2333	t0027577	16	0	145.812
t0000216	5387	t0015426	37	0	145.595
t0011190	145	t0257718	1	2.94749e-37	145
t0011199	145	t0347726	1	2.94749e-37	145
t0011205	145	t0408314	1	2.94749e-37	145
t0011207	145	t0427353	1	2.94749e-37	145
t0011223	145	t0586295	1	2.94749e-37	145
t0011232	145	t0266065	1	2.94749e-37	145
t0011247	145	t0403634	1	2.94749e-37	145
t0011188	145	t0248243	1	2.94749e-37	145
t0011244	145	t0363111	1	2.94749e-37	145
t0011245	145	t0370296	1	2.94749e-37	145
t0011249	145	t0456803	1	2.94749e-37	145
t0006122	289	t0181542	2	5.68179e-73	144.5
t0000394	3464	t0020726	24	0	144.333
t0004196	432	t0084557	3	2.24058e-108	144
t0011286	144	t0318120	1	5.36094e-37	144
t0011267	144	t0330622	1	5.36094e-37	144
t0011276	144	t0569496	1	5.36094e-37	144
t0011287	144	t0324629	1	5.36094e-37	144
t0011307	144	t0589883	1	5.36094e-37	144
t0006172	286	t0118850	2	3.41761e-72	143
t0006179	286	t0114803	2	3.41761e-72	143
t0006184	286	t0156599	2	3.41761e-72	143
t0011346	143	t0352660	1	9.7501e-37	143
t0011318	143	t0347687	1	9.7501e-37	143
t0011327	143	t0468737	1	9.7501e-37	143
t0011343	143	t0294412	1	9.7501e-37	143
t0002081	856	t0058108	6	3.4534e-213	142.667
t0001058	1569	t0035353	11	0	142.636
t0003159	570	t0072655	4	1.85112e-142	142.5
t0004253	426	t0103419	3	8.10375e-107	142
t0006213	284	t0164241	2	1.13022e-71	142
t0006214	284	t0171100	2	1.13022e-71	142
t0011374	142	t0324147	1	1.7732e-36	142
t0011411	142	t0461309	1	1.7732e-36	142
t0011414	142	t0466167	1	1.7732e-36	142
t0011418	142	t0507656	1	1.7732e-36	142
t0011362	142	t0218028	1	1.7732e-36	142
t0011363	142	t0231719	1	1.7732e-36	142
t0011367	142	t0273290	1	1.7732e-36	142
t0011404	142	t0334702	1	1.7732e-36	142
t0011405	142	t0357777	1	1.7732e-36	142
t0011412	142	t0463470	1	1.7732e-36	142
t0004275	425	t0109324	3	1.47361e-106	141.667
t0000798	1983	t0030369	14	0	141.643
t0006231	283	t0117474	2	2.05526e-71	141.5
t0006239	283	t0156424	2	2.05526e-71	141.5
t0002549	705	t0060721	5	9.46701e-176	141
t0006251	282	t0158614	2	3.73732e-71	141
t0006258	282	t0181885	2	3.73732e-71	141
t0006255	282	t0173156	2	3.73732e-71	141
t0006267	282	t0174362	2	3.73732e-71	141
t0011452	141	t0346721	1	3.22466e-36	141
t0011489	141	t0438164	1	3.22466e-36	141
t0011494	141	t0504465	1	3.22466e-36	141
t0011448	141	t0302369	1	3.22466e-36	141
t0011451	141	t0346050	1	3.22466e-36	141
t0011463	141	t0560364	1	3.22466e-36	141
t0011466	141	t0198682	1	3.22466e-36	141
t0011490	141	t0475969	1	3.22466e-36	141
t0004307	422	t0107668	3	8.85992e-106	140.667
t0003209	562	t0078901	4	2.21264e-140	140.5
t0006282	281	t0164164	2	6.79585e-71	140.5
t0006293	281	t0156192	2	6.79585e-71	140.5
t0006324	280	t0182451	2	1.23571e-70	140
t0006305	280	t0155871	2	1.23571e-70	140
t0011519	140	t0249619	1	5.86396e-36	140
t0011521	140	t0264492	1	5.86396e-36	140
t0011524	140	t0324533	1	5.86396e-36	140
t0011569	140	t0432474	1	5.86396e-36	140
t0011513	140	t0207400	1	5.86396e-36	140
t0011528	140	t0383794	1	5.86396e-36	140
t0011543	140	t0578889	1	5.86396e-36	140
t0011547	140	t0201477	1	5.86396e-36	140
t0004329	418	t0095075	3	9.68409e-105	139.333
t0000154	6546	t0012895	47	0	139.277
t0004343	417	t0093250	3	1.76075e-104	139
t0004342	417	t0091272	3	1.76075e-104	139
t0006341	278	t0127890	2	4.08534e-70	139
t0006365	278	t0141498	2	4.08534e-70	139
t0006367	278	t0150040	2	4.08534e-70	139
t0011582	139	t0209049	1	1.06629e-35	139
t0011588	139	t0248856	1	1.06629e-35	139
t0011589	139	t0280684	1	1.06629e-35	139
t0011590	139	t0283395	1	1.06629e-35	139
t0011597	139	t0340951	1	1.06629e-35	139
t0011608	139	t0605167	1	1.06629e-35	139
t0011619	139	t0301886	1	1.06629e-35	139
t0011635	139	t0501958	1	1.06629e-35	139
t0002592	694	t0062797	5	6.79721e-173	138.8
t0004363	415	t0084057	3	5.82041e-104	138.333
t0001370	1242	t0042417	9	4.47753e-308	138
t0006399	276	t0111387	2	1.35051e-69	138
t0006393	276	t0171454	2	1.35051e-69	138
t0011648	138	t0241238	1	1.93883e-35	138
t0011654	138	t0307899	1	1.93883e-35	138
t0011692	138	t0464794	1	1.93883e-35	138
t0011663	138	t0409652	1	1.93883e-35	138
t0011669	138	t0454227	1	1.93883e-35	138
t0011675	138	t0204750	1	1.93883e-35	138
t0011686	138	t0382936	1	1.93883e-35	138
t0000508	2888	t0022595	21	0	137.524
t0006422	275	t0127308	2	2.45536e-69	137.5
t0006427	275	t0153668	2	2.45536e-69	137.5
t0004387	412	t0087156	3	3.4977e-103	137.333
t0001391	1234	t0039914	9	5.34263e-306	137.111
t0004398	411	t0095924	3	6.35882e-103	137
t0006434	274	t0118888	2	4.46397e-69	137
t0011712	137	t0340169	1	3.52518e-35	137
t0011722	137	t0602013	1	3.52518e-35	137
t0011743	137	t0397210	1	3.52518e-35	137
t0011752	137	t0480796	1	3.52518e-35	137
t0011759	137	t0597535	1	3.52518e-35	137
t0000336	3972	t0018046	29	0	136.966
t0004409	410	t0110571	3	1.15601e-102	136.667
t0001855	952	t0048313	7	2.43349e-236	136
t0004436	408	t0109566	3	3.82045e-102	136
t0011808	136	t0425726	1	6.40916e-35	136
t0011816	136	t0485914	1	6.40916e-35	136
t0011764	136	t0217170	1	6.40916e-35	136
t0011823	136	t0587318	1	6.40916e-35	136
t0003334	543	t0081457	4	1.89458e-135	135.75
t0003336	543	t0073800	4	1.89458e-135	135.75
t0004437	407	t0091349	3	6.9451e-102	135.667
t0002649	677	t0068663	5	1.75901e-168	135.4
t0004450	406	t0090764	3	1.26251e-101	135.333
t0002210	810	t0053694	6	3.02558e-201	135
t0006522	270	t0185470	2	4.87566e-68	135
t0006525	270	t0148406	2	4.87566e-68	135
t0011843	135	t0406810	1	1.1652e-34	135
t0011861	135	t0577105	1	1.1652e-34	135
t0011886	135	t0375023	1	1.1652e-34	135
t0011830	135	t0208802	1	1.1652e-34	135
t0011839	135	t0346855	1	1.1652e-34	135
t0011880	135	t0328222	1	1.1652e-34	135
t0011893	135	t0470829	1	1.1652e-34	135
t0011902	135	t0602821	1	1.1652e-34	135
t0003354	539	t0081447	4	2.06868e-134	134.75
t0003355	539	t0083839	4	2.06868e-134	134.75
t0001139	1480	t0036111	11	0	134.545
t0006535	269	t0125617	2	8.86305e-68	134.5
t0006562	268	t0170862	2	1.61109e-67	134
t0006564	268	t0182692	2	1.61109e-67	134
t0011907	134	t0195626	1	2.11823e-34	134
t0011972	134	t0334556	1	2.11823e-34	134
t0011987	134	t0485061	1	2.11823e-34	134
t0011958	134	t0194073	1	2.11823e-34	134
t0011967	134	t0300875	1	2.11823e-34	134
t0011969	134	t0311741	1	2.11823e-34	134
t0002685	669	t0059181	5	2.09644e-166	133.8
t0004498	401	t0111248	3	2.50553e-100	133.667
t0002689	668	t0061236	5	3.81055e-166	133.6
t0000495	2938	t0021708	22	0	133.545
t0000855	1868	t0029612	14	0	133.429
t0002700	665	t0062503	5	2.2881e-165	133
t0012041	133	t0211973	1	3.85057e-34	133
t0011998	133	t0209466	1	3.85057e-34	133
t0012024	133	t0457218	1	3.85057e-34	133
t0012046	133	t0243874	1	3.85057e-34	133
t0012049	133	t0274497	1	3.85057e-34	133
t0012057	133	t0383659	1	3.85057e-34	133
t0012081	133	t0570243	1	3.85057e-34	133
t0000630	2387	t0025490	18	0	132.611
t0006634	265	t0185451	2	9.67526e-67	132.5
t0006642	265	t0138016	2	9.67526e-67	132.5
t0002707	662	t0063335	5	1.37379e-164	132.4
t0006669	264	t0151341	2	1.75854e-66	132
t0012104	132	t0515846	1	6.99928e-34	132
t0012112	132	t0593209	1	6.99928e-34	132
t0012132	132	t0392098	1	6.99928e-34	132
t0012135	132	t0398191	1	6.99928e-34	132
t0012097	132	t0341812	1	6.99928e-34	132
t0012109	132	t0568570	1	6.99928e-34	132
t0012122	132	t0279670	1	6.99928e-34	132
t0012127	132	t0337707	1	6.99928e-34	132
t0012145	132	t0507385	1	6.99928e-34	132
t0002265	790	t0053264	6	4.68483e-196	131.667
t0006693	263	t0145178	2	3.19618e-66	131.5
t0006681	263	t0160622	2	3.19618e-66	131.5
t0004576	394	t0104416	3	1.64171e-98	131.333
t0000962	1707	t0032651	13	0	131.308
t0003439	525	t0081153	4	8.88335e-131	131.25
t0006721	262	t0151638	2	5.80894e-66	131
t0012182	131	t0528427	1	1.27221e-33	131
t0012236	131	t0533591	1	1.27221e-33	131
t0012180	131	t0506829	1	1.27221e-33	131
t0012191	131	t0579286	1	1.27221e-33	131
t0002284	784	t0056062	6	1.68788e-194	130.667
t0003458	522	t0077148	4	5.33207e-130	130.5
t0002286	782	t0055685	6	5.57431e-194	130.333
t0001669	1042	t0046244	8	6.15959e-258	130.25
t0003473	521	t0068870	4	9.68999e-130	130.25
t0003475	521	t0076618	4	9.68999e-130	130.25
t0001470	1172	t0040162	9	6.55598e-290	130.222
t0006767	260	t0129259	2	1.91863e-65	130
t0012255	130	t0300312	1	2.31227e-33	130
t0012261	130	t0404650	1	2.31227e-33	130
t0012292	130	t0364318	1	2.31227e-33	130
t0012250	130	t0252603	1	2.31227e-33	130
t0012274	130	t0547385	1	2.31227e-33	130
t0012285	130	t0290846	1	2.31227e-33	130
t0012309	130	t0553357	1	2.31227e-33	130
t0000488	2985	t0021215	23	0	129.783
t0001478	1167	t0040870	9	1.29919e-288	129.667
t0004627	389	t0108832	3	3.25443e-97	129.667
t0000134	6997	t0011828	54	0	129.574
t0001683	1036	t0045969	8	2.21814e-256	129.5
t0006791	259	t0146984	2	3.48674e-65	129.5
t0006777	259	t0124055	2	3.48674e-65	129.5
t0006789	259	t0126797	2	3.48674e-65	129.5
t0002775	647	t0063438	5	1.07022e-160	129.4
t0000114	7763	t0010868	60	0	129.383
t0001694	1032	t0046206	8	2.41851e-255	129
t0012338	129	t0438249	1	4.20236e-33	129
t0012365	129	t0277267	1	4.20236e-33	129
t0012368	129	t0308793	1	4.20236e-33	129
t0012392	129	t0570622	1	4.20236e-33	129
t0012318	129	t0206123	1	4.20236e-33	129
t0012336	129	t0398383	1	4.20236e-33	129
t0012346	129	t0500657	1	4.20236e-33	129
t0012349	129	t0528136	1	4.20236e-33	129
t0012389	129	t0531451	1	4.20236e-33	129
t0002789	644	t0061233	5	6.42165e-160	128.8
t0002786	644	t0060153	5	6.42165e-160	128.8
t0003509	515	t0075648	4	3.48943e-128	128.75
t0004667	386	t0107325	3	1.95291e-96	128.667
t0001701	1028	t0044737	8	2.63668e-254	128.5
t0006846	257	t0125824	2	1.15143e-64	128.5
t0004679	385	t0096165	3	3.54869e-96	128.333
t0001336	1282	t0039596	10	1.08158e-316	128.2
t0001986	896	t0051847	7	8.24057e-222	128
t0004683	384	t0093942	3	6.44829e-96	128
t0004692	384	t0100451	3	6.44829e-96	128
t0006860	256	t0139492	2	2.09233e-64	128
t0006872	256	t0138399	2	2.09233e-64	128
t0012428	128	t0228070	1	7.63703e-33	128
t0012425	128	t0207943	1	7.63703e-33	128
t0012434	128	t0282191	1	7.63703e-33	128
t0012453	128	t0415719	1	7.63703e-33	128
t0012455	128	t0453511	1	7.63703e-33	128
t0004701	383	t0089914	3	1.17169e-95	127.667
t0002338	763	t0053848	6	4.7251e-189	127.167
t0006920	254	t0140912	2	6.90831e-64	127
t0012495	127	t0485613	1	1.38781e-32	127
t0012501	127	t0525842	1	1.38781e-32	127
t0012552	127	t0610870	1	1.38781e-32	127
t0012469	127	t0201491	1	1.38781e-32	127
t0012494	127	t0485078	1	1.38781e-32	127
t0012500	127	t0525716	1	1.38781e-32	127
t0012507	127	t0575171	1	1.38781e-32	127
t0012515	127	t0255213	1	1.38781e-32	127
t0012546	127	t0582703	1	1.38781e-32	127
t0002344	761	t0058134	6	1.55984e-188	126.833
t0001733	1014	t0046839	8	1.12701e-250	126.75
t0001734	1014	t0046901	8	1.12701e-250	126.75
t0000532	2783	t0022274	22	0	126.5
t0006942	253	t0112545	2	1.25523e-63	126.5
t0002858	631	t0067147	5	1.51076e-156	126.2
t0006946	252	t0113627	2	2.28067e-63	126
t0012570	126	t0311844	1	2.5218e-32	126
t0012590	126	t0532849	1	2.5218e-32	126
t0012617	126	t0387282	1	2.5218e-32	126
t0012588	126	t0512234	1	2.5218e-32	126
t0012607	126	t0297149	1	2.5218e-32	126
t0012631	126	t0524736	1	2.5218e-32	126
t0003607	502	t0070476	4	8.20765e-125	125.5
t0006970	251	t0160903	2	4.14369e-63	125.5
t0006979	251	t0160664	2	4.14369e-63	125.5
t0003618	501	t0080780	4	1.49113e-124	125.25
t0004812	375	t0100021	3	1.39136e-93	125
t0006995	250	t0176253	2	7.52833e-63	125
t0007006	250	t0183628	2	7.52833e-63	125
t0012639	125	t0216632	1	4.5821e-32	125
t0012644	125	t0256508	1	4.5821e-32	125
t0012649	125	t0294024	1	4.5821e-32	125
t0012657	125	t0405368	1	4.5821e-32	125
t0012680	125	t0196106	1	4.5821e-32	125
t0012637	125	t0193683	1	4.5821e-32	125
t0012665	125	t0503191	1	4.5821e-32	125
t0012668	125	t0520002	1	4.5821e-32	125
t0012679	125	t0191584	1	4.5821e-32	125
t0012699	125	t0383730	1	4.5821e-32	125
t0012709	125	t0454135	1	4.5821e-32	125
t0003628	499	t0076757	4	4.9214e-124	124.75
t0004821	374	t0096332	3	2.52772e-93	124.667
t0004824	374	t0106369	3	2.52772e-93	124.667
t0007019	249	t0178299	2	1.36772e-62	124.5
t0004843	373	t0090722	3	4.59207e-93	124.333
t0002401	745	t0058338	6	2.19676e-184	124.167
t0001232	1365	t0035370	11	0	124.091
t0004853	372	t0107461	3	8.34216e-93	124
t0007046	248	t0157358	2	2.48474e-62	124
t0012722	124	t0258032	1	8.32516e-32	124
t0012729	124	t0313401	1	8.32516e-32	124
t0012742	124	t0422884	1	8.32516e-32	124
t0012743	124	t0465990	1	8.32516e-32	124
t0012777	124	t0483489	1	8.32516e-32	124
t0012780	124	t0492394	1	8.32516e-32	124
t0012740	124	t0418777	1	8.32516e-32	124
t0012749	124	t0534542	1	8.32516e-32	124
t0012752	124	t0591601	1	8.32516e-32	124
t0012761	124	t0288535	1	8.32516e-32	124
t0012764	124	t0335952	1	8.32516e-32	124
t0012785	124	t0522746	1	8.32516e-32	124
t0002407	743	t0056518	6	7.24918e-184	123.833
t0003662	495	t0076074	4	5.35986e-123	123.75
t0007061	247	t0163214	2	4.51391e-62	123.5
t0007053	247	t0119710	2	4.51391e-62	123.5
t0007057	247	t0139690	2	4.51391e-62	123.5
t0001030	1600	t0031244	13	0	123.077
t0004890	369	t0091125	3	5.00073e-92	123
t0012793	123	t0198858	1	1.51249e-31	123
t0012801	123	t0304363	1	1.51249e-31	123
t0012816	123	t0472276	1	1.51249e-31	123
t0012819	123	t0496260	1	1.51249e-31	123
t0012846	123	t0308953	1	1.51249e-31	123
t0012809	123	t0433136	1	1.51249e-31	123
t0012837	123	t0211280	1	1.51249e-31	123
t0007132	245	t0135731	2	1.48954e-61	122.5
t0004923	366	t0103127	3	2.99711e-91	122
t0004925	366	t0108019	3	2.99711e-91	122
t0007162	244	t0172149	2	2.70571e-61	122
t0007142	244	t0142916	2	2.70571e-61	122
t0012920	122	t0194335	1	2.74768e-31	122
t0012922	122	t0206503	1	2.74768e-31	122
t0012925	122	t0236400	1	2.74768e-31	122
t0012896	122	t0338030	1	2.74768e-31	122
t0012900	122	t0363065	1	2.74768e-31	122
t0012932	122	t0302640	1	2.74768e-31	122
t0012935	122	t0341968	1	2.74768e-31	122
t0012937	122	t0375673	1	2.74768e-31	122
t0012943	122	t0416958	1	2.74768e-31	122
t0012952	122	t0494469	1	2.74768e-31	122
t0012965	122	t0601300	1	2.74768e-31	122
t0004931	365	t0108220	3	5.44387e-91	121.667
t0004934	365	t0107571	3	5.44387e-91	121.667
t0007182	243	t0172364	2	4.9147e-61	121.5
t0007183	243	t0182865	2	4.9147e-61	121.5
t0004951	363	t0094841	3	1.79592e-90	121
t0004952	363	t0095589	3	1.79592e-90	121
t0007198	242	t0150007	2	8.92684e-61	121
t0007205	242	t0176838	2	8.92684e-61	121
t0007189	242	t0185313	2	8.92684e-61	121
t0007191	242	t0119030	2	8.92684e-61	121
t0012969	121	t0200816	1	4.99129e-31	121
t0012979	121	t0292835	1	4.99129e-31	121
t0012988	121	t0379531	1	4.99129e-31	121
t0013014	121	t0189874	1	4.99129e-31	121
t0013022	121	t0287845	1	4.99129e-31	121
t0013036	121	t0460077	1	4.99129e-31	121
t0013037	121	t0469404	1	4.99129e-31	121
t0012978	121	t0283112	1	4.99129e-31	121
t0012997	121	t0440143	1	4.99129e-31	121
t0013021	121	t0270203	1	4.99129e-31	121
t0013044	121	t0504237	1	4.99129e-31	121
t0013046	121	t0510029	1	4.99129e-31	121
t0013056	121	t0613871	1	4.99129e-31	121
t0007207	241	t0115625	2	1.62138e-60	120.5
t0001275	1325	t0035693	11	0	120.455
t0000347	3850	t0017111	32	0	120.312
t0003000	601	t0061534	5	9.03992e-149	120.2
t0004992	360	t0099282	3	1.07594e-89	120
t0007248	240	t0124801	2	2.9448e-60	120
t0007249	240	t0129197	2	2.9448e-60	120
t0013086	120	t0537437	1	9.06631e-31	120
t0013096	120	t0240119	1	9.06631e-31	120
t0013101	120	t0296846	1	9.06631e-31	120
t0013132	120	t0575776	1	9.06631e-31	120
t0013057	120	t0206092	1	9.06631e-31	120
t0013067	120	t0281086	1	9.06631e-31	120
t0005010	359	t0101336	3	1.95404e-89	119.667
t0000060	11125	t0007981	93	0	119.624
t0000438	3229	t0019221	27	0	119.593
t0007261	239	t0126724	2	5.34827e-60	119.5
t0000911	1791	t0028505	15	0	119.4
t0003023	596	t0061193	5	1.78576e-147	119.2
t0000988	1666	t0030625	14	0	119
t0003797	476	t0068829	4	4.50461e-118	119
t0005027	357	t0095001	3	6.44459e-89	119
t0007295	238	t0172416	2	9.71305e-60	119
t0007310	238	t0155310	2	9.71305e-60	119
t0013150	119	t0423321	1	1.64672e-30	119
t0013194	119	t0291727	1	1.64672e-30	119
t0013200	119	t0317506	1	1.64672e-30	119
t0013204	119	t0337870	1	1.64672e-30	119
t0013149	119	t0417501	1	1.64672e-30	119
t0013177	119	t0596241	1	1.64672e-30	119
t0001857	951	t0044301	8	2.41257e-234	118.875
t0000738	2133	t0024988	18	0	118.5
t0002517	711	t0054362	6	1.42489e-175	118.5
t0007320	237	t0120908	2	1.76394e-59	118.5
t0007331	237	t0113491	2	1.76394e-59	118.5
t0000141	6871	t0011188	58	0	118.466
t0007352	236	t0143640	2	3.20329e-59	118
t0013252	118	t0368043	1	2.99075e-30	118
t0013285	118	t0247086	1	2.99075e-30	118
t0013258	118	t0431532	1	2.99075e-30	118
t0013263	118	t0449603	1	2.99075e-30	118
t0013325	118	t0511161	1	2.99075e-30	118
t0001088	1533	t0031285	13	0	117.923
t0003839	471	t0069575	4	8.8948e-117	117.75
t0005057	353	t0094239	3	7.00812e-88	117.667
t0003067	588	t0064049	5	2.11136e-145	117.6
t0003849	470	t0072663	4	1.61514e-116	117.5
t0000451	3162	t0019173	27	0	117.111
t0003865	468	t0068953	4	5.32515e-116	117
t0007408	234	t0185491	2	1.05627e-58	117
t0013346	117	t0331333	1	5.43138e-30	117
t0013378	117	t0571157	1	5.43138e-30	117
t0013383	117	t0593158	1	5.43138e-30	117
t0013413	117	t0330154	1	5.43138e-30	117
t0013428	117	t0462819	1	5.43138e-30	117
t0013438	117	t0555944	1	5.43138e-30	117
t0013418	117	t0379673	1	5.43138e-30	117
t0013420	117	t0392688	1	5.43138e-30	117
t0013427	117	t0455776	1	5.43138e-30	117
t0007424	233	t0145440	2	1.91797e-58	116.5
t0000478	3025	t0019606	26	0	116.346
t0003900	465	t0081150	4	3.18756e-115	116.25
t0001657	1046	t0040169	9	3.01127e-257	116.222
t0001660	1046	t0041622	9	3.01127e-257	116.222
t0003109	581	t0065757	5	1.37368e-143	116.2
t0000861	1858	t0027680	16	0	116.125
t0000583	2552	t0022048	22	0	116
t0013453	116	t0262712	1	9.86303e-30	116
t0013457	116	t0289065	1	9.86303e-30	116
t0013460	116	t0314485	1	9.86303e-30	116
t0013476	116	t0459841	1	9.86303e-30	116
t0013489	116	t0607414	1	9.86303e-30	116
t0013515	116	t0453672	1	9.86303e-30	116
t0013465	116	t0340930	1	9.86303e-30	116
t0013503	116	t0299506	1	9.86303e-30	116
t0001014	1623	t0030192	14	0	115.929
t0005144	347	t0096014	3	2.51132e-86	115.667
t0003915	462	t0069175	4	1.90771e-114	115.5
t0007487	231	t0114269	2	6.32309e-58	115.5
t0007500	231	t0170986	2	6.32309e-58	115.5
t0007505	231	t0178308	2	6.32309e-58	115.5
t0007516	231	t0145060	2	6.32309e-58	115.5
t0005167	345	t0092616	3	8.27788e-86	115
t0005180	345	t0103852	3	8.27788e-86	115
t0013529	115	t0208318	1	1.79094e-29	115
t0013549	115	t0314390	1	1.79094e-29	115
t0013551	115	t0345920	1	1.79094e-29	115
t0013589	115	t0263376	1	1.79094e-29	115
t0013635	115	t0557506	1	1.79094e-29	115
t0013532	115	t0232778	1	1.79094e-29	115
t0013547	115	t0307135	1	1.79094e-29	115
t0013553	115	t0387658	1	1.79094e-29	115
t0013562	115	t0444803	1	1.79094e-29	115
t0013578	115	t0550058	1	1.79094e-29	115
t0013603	115	t0363787	1	1.79094e-29	115
t0013615	115	t0466644	1	1.79094e-29	115
t0013630	115	t0520797	1	1.79094e-29	115
t0013631	115	t0521092	1	1.79094e-29	115
t0013632	115	t0530078	1	1.79094e-29	115
t0000953	1720	t0029321	15	0	114.667
t0005184	344	t0084029	3	1.50284e-85	114.667
t0005226	342	t0105723	3	4.95295e-85	114
t0007591	228	t0166947	2	3.78392e-57	114
t0007607	228	t0172940	2	3.78392e-57	114
t0013678	114	t0506893	1	3.25177e-29	114
t0013710	114	t0283514	1	3.25177e-29	114
t0013729	114	t0493098	1	3.25177e-29	114
t0013644	114	t0206144	1	3.25177e-29	114
t0013664	114	t0385135	1	3.25177e-29	114
t0013679	114	t0521752	1	3.25177e-29	114
t0013708	114	t0279601	1	3.25177e-29	114
t0013712	114	t0298538	1	3.25177e-29	114
t0013718	114	t0381311	1	3.25177e-29	114
t0013736	114	t0534303	1	3.25177e-29	114
t0007619	227	t0119467	2	6.86932e-57	113.5
t0007630	227	t0182975	2	6.86932e-57	113.5
t0007636	227	t0146553	2	6.86932e-57	113.5
t0001518	1134	t0038898	10	2.44637e-278	113.4
t0005248	340	t0085057	3	1.6322e-84	113.333
t0005254	340	t0108375	3	1.6322e-84	113.333
t0004004	452	t0078272	4	7.41605e-112	113
t0007660	226	t0113480	2	1.24701e-56	113
t0007659	226	t0175387	2	1.24701e-56	113
t0007669	226	t0167892	2	1.24701e-56	113
t0013753	113	t0366155	1	5.90373e-29	113
t0013760	113	t0402308	1	5.90373e-29	113
t0013776	113	t0530420	1	5.90373e-29	113
t0013801	113	t0353245	1	5.90373e-29	113
t0013783	113	t0587754	1	5.90373e-29	113
t0013789	113	t0221735	1	5.90373e-29	113
t0013827	113	t0519937	1	5.90373e-29	113
t0013828	113	t0534239	1	5.90373e-29	113
t0001727	1016	t0042808	9	1.7687e-249	112.889
t0001528	1127	t0037924	10	1.58823e-276	112.7
t0005274	338	t0101241	3	5.37821e-84	112.667
t0001530	1125	t0039559	10	5.2325e-276	112.5
t0007678	225	t0141656	2	2.26364e-56	112.5
t0001742	1011	t0041860	9	3.48458e-248	112.333
t0004035	449	t0081088	4	4.43516e-111	112.25
t0004032	449	t0073647	4	4.43516e-111	112.25
t0007703	224	t0112221	2	4.10895e-56	112
t0013878	112	t0439225	1	1.07177e-28	112
t0013900	112	t0600930	1	1.07177e-28	112
t0013922	112	t0350207	1	1.07177e-28	112
t0013926	112	t0404294	1	1.07177e-28	112
t0013937	112	t0457796	1	1.07177e-28	112
t0013941	112	t0492835	1	1.07177e-28	112
t0013849	112	t0262333	1	1.07177e-28	112
t0013855	112	t0319963	1	1.07177e-28	112
t0013884	112	t0473894	1	1.07177e-28	112
t0013892	112	t0560410	1	1.07177e-28	112
t0013904	112	t0203420	1	1.07177e-28	112
t0013914	112	t0276052	1	1.07177e-28	112
t0013915	112	t0298995	1	1.07177e-28	112
t0013946	112	t0526060	1	1.07177e-28	112
t0013950	112	t0564717	1	1.07177e-28	112
t0000785	2010	t0025631	18	0	111.667
t0007741	223	t0118535	2	7.45824e-56	111.5
[truncated: 46,726 more rows]

## Sheet: S2
NAT_type	sense_transcript	sense_type	sense_start	sense_end	anti_transcript	anti_type	anti_start	anti_end	length	SF_sense_density	SF_anti_density	PF_sense_density	PF_anti_density
trans	Tb11.v4.0009	pseudo	657	858	Tb927.1.450	pseudo	5627	5828	202	167.6	164.484	59.0316	42.1603
trans	Tb11.v4.0009	pseudo	657	858	Tb927.1.430	pseudo	5630	5831	202	158	159.798	58.6885	42.095
trans	Tb927.1.240	pseudo	5631	5832	Tb11.v4.0009	pseudo	657	858	202	152.405	161.829	57.5053	42.1431
trans	Tb11.v4.0009	pseudo	657	858	Tb927.1.500	pseudo	5019	5220	202	152.405	161.829	57.5053	42.1431
trans	Tb11.v4.0009	pseudo	657	858	Tb927.1.300	pseudo	5022	5223	202	130.199	156.29	57.0177	41.9754
trans	ingi	ingi	4555	4756	Tb11.v4.0009	pseudo	657	858	202	109.22	148.386	46.0637	37.7116
trans	Tb11.v4.0009	pseudo	726	858	Tb927.10.16210	gene	756	888	133	107.664	110.922	37.3716	34.2586
trans	ingi	ingi	5110	5193	Tb09.v4.0074	pseudo	1231	1314	84	94.7883	76.1891	3.63766	2.09036
trans	Tb09.v4.0074	pseudo	1229	1314	Tb11.v4.0027	pseudo	338	423	86	92.3129	74.0087	3.57582	2.0765
trans	Tb927.1.240	pseudo	6190	6274	Tb09.v4.0074	pseudo	1230	1314	85	92.0629	75.0774	2.76563	2.02191
trans	Tb09.v4.0074	pseudo	1230	1314	Tb927.1.450	pseudo	6190	6274	85	92.0629	75.0774	2.76563	2.02191
trans	Tb09.v4.0074	pseudo	1230	1314	Tb927.1.500	pseudo	5578	5662	85	92.0629	75.0774	2.76563	2.02191
trans	Tb927.1.430	pseudo	6187	6271	Tb09.v4.0074	pseudo	1230	1314	85	91.1621	75.1338	2.29945	2.04828
trans	Tb09.v4.0074	pseudo	1229	1314	Tb11.1780	pseudo	223	308	86	90.2065	73.9775	3.11498	2.07028
trans	Tb09.v4.0074	pseudo	1230	1314	Tb927.1.300	pseudo	5579	5663	85	86.1425	75.229	3.18796	2.02769
trans	Tb927.1.350	pseudo	876	960	Tb09.v4.0074	pseudo	1230	1314	85	86.1425	75.229	3.18796	2.02769
trans	Tb927.2.820	pseudo	32	116	Tb09.v4.0074	pseudo	1230	1314	85	74.5964	72.5098	2.52321	1.94516
trans	Tb11.v4.0045	pseudo	1	37	Tb927.10.16200	gene	1	37	37	56.3314	56.3314	0.468289	0.468289
trans	Tb09.v4.0143	pseudo	1	212	Tb927.1.430	pseudo	1091	1302	212	54.5635	55.9137	14.0432	12.745
trans	Tb09.v4.0143	pseudo	1	227	Tb927.1.450	pseudo	1079	1305	227	53.9621	57.2835	13.1998	13.2458
trans	Tb927.1.240	pseudo	1034	1260	Tb09.v4.0143	pseudo	1	227	227	53.7836	55.4687	13.0459	13.1275
trans	Tb09.v4.0143	pseudo	1	222	Tb927.10.16200	gene	1	222	222	53.7211	46.816	13.1985	12.1257
trans	Tb09.v4.0143	pseudo	1	227	Tb927.1.500	pseudo	469	697	229	53.6872	46.8325	13.1235	13.3279
trans	Tb09.v4.0143	pseudo	1	227	Tb927.1.300	pseudo	472	698	227	53.15	56.748	13.1829	12.8327
trans	Tb11.01.0560	gene	119	344	Tb09.v4.0143	pseudo	1	225	225	52.803	47.3886	13.1389	11.6142
trans	Tb09.211.4940	gene	152	378	Tb09.v4.0143	pseudo	1	227	227	52.7902	54.9355	13.1193	12.6883
trans	Tb927.1.350	pseudo	471	697	Tb09.v4.0143	pseudo	1	227	227	51.9079	55.7804	12.9052	13.0195
trans	ingi	ingi	4	235	Tb09.v4.0143	pseudo	1	232	232	50.3993	52.1363	11.7243	12.5129
trans	Tb11.01.0560	gene	125	357	Tb927.5.4710	pseudo	519	751	233	40.4822	48.1068	12.4398	11.6566
trans	Tb09.211.4940	gene	149	395	Tb927.5.4710	pseudo	515	762	248	39.1048	53.133	11.7861	12.0463
trans	Tb927.1.350	pseudo	468	715	Tb927.5.4710	pseudo	514	762	249	38.7536	54.2884	11.5666	12.3207
trans	Tb09.v4.0056	pseudo	1	47	Tb927.10.16200	gene	1	47	47	38.5238	38.6658	2.46581	2.46581
trans	Tb927.1.240	pseudo	1031	1075	Tb11.v4.0045	pseudo	1	45	45	38.5232	38.5232	0.358436	0.358436
trans	Tb927.1.350	pseudo	468	512	Tb11.v4.0045	pseudo	1	45	45	38.5232	38.5232	0.358436	0.358436
trans	Tb11.v4.0045	pseudo	1	45	Tb927.1.300	pseudo	469	513	45	38.5232	38.5232	0.358436	0.358436
trans	Tb11.v4.0045	pseudo	1	45	Tb927.1.450	pseudo	1076	1120	45	38.5232	38.5232	0.358436	0.358436
trans	Tb11.v4.0045	pseudo	1	45	Tb927.1.500	pseudo	466	510	45	38.5232	38.5232	0.358436	0.358436
trans	Tb11.01.0560	gene	114	158	Tb11.v4.0045	pseudo	1	45	45	38.218	17.6002	0.358436	0.317696
trans	ingi	ingi	6	50	Tb11.v4.0045	pseudo	1	45	45	38.1832	21.7602	0.338436	0.0984365
trans	Tb09.211.4940	gene	148	193	Tb11.v4.0045	pseudo	1	46	46	37.0449	37.0449	0.34465	0.34465
trans	Tb927.1.430	pseudo	1091	1413	Tb927.5.4710	pseudo	421	744	324	33.9963	43.0197	10.1423	9.79088
trans	Tb927.5.4710	pseudo	421	751	Tb927.10.16200	gene	4	333	330	33.4368	37.7467	9.66152	9.53657
trans	Tb927.5.4710	pseudo	421	762	Tb927.1.450	pseudo	1076	1416	341	33.3102	43.9557	9.64183	10.1319
trans	Tb927.1.240	pseudo	1031	1371	Tb927.5.4710	pseudo	421	762	342	33.2988	42.9223	9.57262	10.0872
trans	Tb927.1.300	pseudo	469	809	Tb927.5.4710	pseudo	421	762	342	32.8902	43.7473	9.66096	9.89709
trans	Tb927.5.4710	pseudo	421	762	Tb927.1.500	pseudo	466	808	343	32.6635	37.2121	9.58588	10.1655
trans	Tb09.v4.0056	pseudo	1	37	Tb927.1.430	pseudo	1091	1127	37	32.2794	21.4373	3.53865	2.94941
trans	Tb927.8.6568	tRNA	1	72	Tb927.8.6566	tRNA	1	72	72	31.3077	31.3077	16.6346	16.6346
trans	Tb09.211.4940	gene	149	203	Tb09.v4.0056	pseudo	1	55	55	29.8168	29.9407	1.9022	1.93077
trans	ingi	ingi	5	342	Tb927.5.4710	pseudo	425	763	339	29.6036	39.1047	8.57529	9.42806
trans	ingi	ingi	6	60	Tb09.v4.0056	pseudo	1	55	55	29.5597	17.0297	1.88791	1.65934
trans	Tb927.1.240	pseudo	1030	1085	Tb09.v4.0056	pseudo	1	56	56	28.991	29.1114	1.84936	1.87713
trans	Tb927.1.350	pseudo	467	522	Tb09.v4.0056	pseudo	1	56	56	28.991	29.1114	1.84936	1.87713
trans	Tb09.v4.0056	pseudo	1	56	Tb927.1.450	pseudo	1075	1130	56	28.991	29.1114	1.84936	1.87713
trans	Tb09.v4.0056	pseudo	1	56	Tb927.1.300	pseudo	468	523	56	28.991	29.1114	1.84936	1.87713
trans	Tb09.v4.0056	pseudo	1	56	Tb927.1.500	pseudo	465	520	56	28.991	29.1114	1.84936	1.87713
trans	Tb11.01.0560	gene	113	168	Tb09.v4.0056	pseudo	1	56	56	28.9558	14.1517	1.85399	1.36965
trans	Tb927.5.170	gene	101	417	Tb11.57.0077	gene	60	377	318	24.2063	23.6778	4.36227	4.68308
trans	Tb927.5.170	gene	1	329	Tb09.142.0410	gene	4	332	329	23.6344	18.4671	13.7029	12.6758
trans	Tb09.v4.0152	gene	62	393	Tb927.5.170	gene	85	415	331	22.4723	18.5279	4.19902	2.0764
trans	Tb09.v4.0152	gene	152	393	Tb927.3.5740	gene	37	277	241	21.399	19.3294	3.51854	1.6521
trans	Tb927.3.5740	gene	53	305	Tb11.57.0077	gene	124	377	254	20.9619	18.0792	3.4093	2.06366
trans	Tb927.3.5740	gene	5	280	Tb09.142.0410	gene	5	280	276	19.3411	14.2374	8.20332	3.43613
trans	Tb09.142.0440	gene	1	301	Tb09.244.2170	gene	117	416	300	7.48288	5.95598	0.459946	0.688937
trans	Tb927.5.4640	gene	1	145	Tb927.10.90	gene	1	145	145	7.32372	7.15082	1.47581	1.76301
trans	Tb05.5K5.290	gene	1	145	Tb927.10.90	gene	1	145	145	7.09439	7.15355	2.06034	1.76401
trans	Tb927.7.6880	gene	1	145	Tb927.10.90	gene	1	145	145	6.99328	7.15769	2.04568	1.76401
trans	Tb927.10.90	gene	1	145	Tb927.1.3760	gene	1	145	145	6.99328	7.15769	2.04568	1.76401
trans	ingi	ingi	5144	5193	Tb11.21.0011	gene	1123	1172	50	6.91223	4.60229	3.11217	2.41739
trans	Tb11.01.2870	gene	272	336	Tb11.v4.0027	pseudo	359	423	65	6.66629	5.08418	2.33613	2.17423
trans	Tb11.21.0011	gene	1115	1172	Tb11.v4.0027	pseudo	372	429	58	6.5617	4.52916	2.58563	2.04304
trans	Tb11.21.0011	gene	1115	1172	Tb09.v4.0001	gene	6	63	58	6.5617	4.52916	2.58563	2.04304
trans	Tb11.21.0011	gene	1115	1170	Tb09.v4.0067	pseudo	8	64	57	6.48479	4.62994	2.71239	2.02882
trans	ingi	ingi	5131	5193	Tb11.01.2870	gene	274	336	63	6.36694	4.71124	2.36761	2.19818
trans	Tb09.v4.0001	gene	1	57	Tb10.v4.0084	pseudo	681	737	57	6.28461	6.32064	2.62202	2.62202
trans	Tb09.v4.0001	gene	1	57	Tb11.01.2870	gene	272	328	57	6.2792	5.73808	2.62202	2.6143
trans	Tb09.v4.0001	gene	1	57	Tb09.v4.0074	pseudo	1229	1285	57	6.18853	0.633556	2.53806	0.204214
trans	Tb10.v4.0084	pseudo	681	741	Tb11.v4.0027	pseudo	363	423	61	6.00744	6.00744	2.37841	2.37841
trans	Tb927.2.1460	gene	1	145	Tb927.10.90	gene	1	145	145	5.99025	7.13831	1.88168	1.76401
trans	Tb10.v4.0042	gene	1	145	Tb927.10.90	gene	1	145	145	5.93209	7.11759	1.87581	1.76401
trans	Tb927.10.90	gene	1	145	Tb09.v4.0064	gene	1	145	145	5.88639	7.11889	1.86568	1.76401
trans	Tb09.v4.0067	pseudo	1	55	Tb10.v4.0084	pseudo	683	737	55	5.80597	5.93312	2.66887	2.67703
trans	Tb11.01.2870	gene	274	328	Tb09.v4.0067	pseudo	1	55	55	5.80026	5.31727	2.66887	2.66887
trans	ingi	ingi	5135	5193	Tb10.v4.0084	pseudo	683	741	59	5.6436	5.6436	2.41528	2.41528
trans	Tb927.10.90	gene	1	145	Tb09.142.0300	pseudo	1	145	145	5.27585	7.09298	1.09448	1.76401
trans	Tb10.v4.0215	gene	90	389	Tb09.142.0440	gene	1	301	301	5.05808	5.69602	0.55982	0.671457
trans	Tb927.3.510	gene	1	145	Tb927.10.90	gene	1	145	145	5.03028	7.08522	1.09314	1.76401
trans	Tb11.1520	gene	1	145	Tb927.10.90	gene	1	145	145	4.90139	6.99941	1.07886	1.75258
trans	Tb927.1.350	pseudo	897	960	Tb11.01.2870	gene	273	336	64	4.8526	4.91296	1.838	2.14613
trans	Tb11.01.2870	gene	273	336	Tb927.1.300	pseudo	5600	5663	64	4.8526	4.91296	1.838	2.14613
trans	Tb927.6.3400	gene	1	145	Tb927.10.90	gene	1	145	145	4.57166	6.83464	1.00168	1.76401
trans	Tb927.1.240	pseudo	6211	6274	Tb11.01.2870	gene	273	336	64	4.3504	4.84101	1.10825	2.0958
trans	Tb11.01.2870	gene	273	336	Tb927.1.500	pseudo	5599	5662	64	4.3504	4.84101	1.10825	2.0958
trans	Tb11.01.2870	gene	273	336	Tb927.1.450	pseudo	6211	6274	64	4.3504	4.84101	1.10825	2.0958
trans	Tb927.2.820	pseudo	53	116	Tb11.01.2870	gene	273	336	64	4.3504	4.84101	1.10825	2.0958
trans	Tb11.21.0011	gene	1115	1172	Tb927.1.350	pseudo	910	967	58	4.29251	4.5754	2.02584	2.0296
trans	Tb11.21.0011	gene	1115	1172	Tb927.1.300	pseudo	5613	5670	58	4.29251	4.5754	2.02584	2.0296
trans	Tb11.21.0011	gene	1115	1172	Tb927.1.450	pseudo	6224	6281	58	4.09779	4.50261	1.19778	1.97725
trans	Tb11.21.0011	gene	1115	1172	Tb927.1.500	pseudo	5612	5669	58	4.09779	4.50261	1.19778	1.97725
trans	Tb11.21.0011	gene	1115	1172	Tb927.1.240	pseudo	6224	6281	58	4.0945	4.50261	1.19778	1.98101
trans	Tb927.2.820	pseudo	66	116	Tb11.21.0011	gene	1122	1172	51	4.08802	4.65603	1.3168	2.26501
trans	Tb11.21.0011	gene	1115	1172	Tb11.1780	pseudo	257	314	58	4.0583	4.48067	2.02208	2.0296
trans	Tb927.1.350	pseudo	901	960	Tb10.v4.0084	pseudo	682	741	60	3.99591	5.84218	1.83152	2.3526
trans	Tb10.v4.0084	pseudo	682	741	Tb927.1.300	pseudo	5604	5663	60	3.99591	5.84218	1.83152	2.3526
trans	Tb927.3.3420	pseudo	1	145	Tb927.10.90	gene	1	145	145	3.98115	6.83058	0.426477	1.76401
trans	Tb11.21.0011	gene	1115	1172	Tb927.10.70	gene	6	63	58	3.78696	4.48443	0.956291	2.02396
trans	Tb11.01.2870	gene	272	336	Tb11.1780	pseudo	244	308	65	3.58051	5.03878	1.69358	2.1651
trans	Tb10.v4.0084	pseudo	681	741	Tb11.1780	pseudo	248	308	61	3.56061	5.95761	1.8439	2.36839
trans	Tb927.10.70	gene	1	57	Tb10.v4.0084	pseudo	681	737	57	3.49279	6.2747	0.948648	2.60513
trans	Tb927.10.70	gene	1	57	Tb11.01.2870	gene	272	328	57	3.48738	5.69213	0.948648	2.59741
trans	Tb927.1.240	pseudo	6215	6274	Tb10.v4.0084	pseudo	682	741	60	3.4435	5.76303	1.02879	2.29725
trans	Tb10.v4.0084	pseudo	682	741	Tb927.1.450	pseudo	6215	6274	60	3.4435	5.76303	1.02879	2.29725
trans	Tb10.v4.0084	pseudo	682	741	Tb927.1.500	pseudo	5603	5662	60	3.4435	5.76303	1.02879	2.29725
trans	Tb927.2.820	pseudo	57	116	Tb10.v4.0084	pseudo	682	741	60	3.4435	5.76303	1.02879	2.29725
trans	Tb927.10.70	gene	1	57	Tb09.v4.0074	pseudo	1229	1285	57	3.39672	0.58761	0.86469	0.187322
trans	Tb927.10.110	pseudo	1	42	Tb11.21.0011	gene	1129	1170	42	3.34871	4.51046	1.33453	3.13772
trans	Tb10.v4.0206	pseudo	1231	1263	Tb927.1.300	pseudo	5630	5662	33	3.23467	3.23467	0.318739	0.318739
trans	Tb10.v4.0206	pseudo	1231	1263	Tb11.1780	pseudo	274	306	33	3.23467	3.23467	0.318739	0.318739
trans	Tb927.1.350	pseudo	927	959	Tb10.v4.0206	pseudo	1231	1263	33	3.23467	3.23467	0.318739	0.318739
trans	Tb927.10.70	gene	23	55	Tb10.v4.0206	pseudo	1231	1263	33	3.23467	3.23467	0.318739	0.318739
trans	Tb11.01.2870	gene	273	336	Tb927.1.430	pseudo	6208	6271	64	3.01967	4.92432	0.419572	2.13476
trans	Tb10.v4.0084	pseudo	685	730	Tb927.10.110	pseudo	1	46	46	2.99329	6.67884	1.14739	3.43637
trans	Tb11.21.0011	gene	1115	1172	Tb927.1.430	pseudo	6221	6278	58	2.19912	4.58856	0.396611	2.02236
trans	Tb10.v4.0084	pseudo	682	741	Tb927.1.430	pseudo	6212	6271	60	1.97969	5.85468	0.271249	2.3401
trans	Tb927.6.810	gene	69	115	Tb927.6.810	gene	145	191	47	0.481481	0.481481	0.259259	0.259259
trans	Tb927.10.1020	gene	283	464	Tb927.10.10240	gene	179	360	182	0.369342	0.752058	0.0987654	0.234568
trans	Tb927.10.1020	gene	283	393	Tb927.10.7160	gene	1	111	111	0.223443	0.569597	0.137363	0.346154
trans	Tb11.v4.0050	gene	1412	1466	Tb927.10.16260	pseudo	15	69	55	0.157143	0.0142857	0	0
trans	Tb11.1510	pseudo	1412	1466	Tb927.10.16260	pseudo	15	69	55	0.157143	0.0142857	0	0
trans	Tb927.10.16260	pseudo	84	161	Tb10.v4.0187	pseudo	1252	1330	79	0.0603448	0.00862069	0	0.0689655
trans	Tb05.5K5.250	gene	401	456	Tb09.142.0360	gene	334	389	56	0.0555556	0.0277778	0.111111	0.111111
trans	Tb927.1.430	pseudo	1021	1111	Tb11.0210	pseudo	198	288	91	0.0539906	0.0809859	0	0.0328638
trans	Tb11.17.0004	gene	81	142	Tb05.5K5.250	gene	395	456	62	0.047619	0.047619	0.130952	0.130952
trans	Tb11.1200	gene	147	1208	Tb11.47.0036	gene	1	1062	1062	0.0469617	0.040931	0.0337729	0.0370968
trans	Tb11.1190	gene	6723	7784	Tb11.47.0036	gene	1	1062	1062	0.0469617	0.0471268	0.0337044	0.0363182
trans	Tb09.160.1620	gene	184	239	Tb09_snoRNA_0008	snoRNA	1	56	56	0.0416667	0.0416667	0.0277778	0.0277778
cis	Tb09.160.1630	gene	184	239	Tb09_snoRNA_0008	snoRNA	1	56	56	0.0416667	0.0416667	0.0277778	0.0277778
trans	Tb927_09_v4.snoRNA.0107	snoRNA	12	67	Tb09.160.1630	gene	184	239	56	0.0416667	0.0416667	0.0277778	0.0277778
trans	Tb09_snoRNA_0004	snoRNA	12	67	Tb09.160.1630	gene	184	239	56	0.0416667	0.0416667	0.0277778	0.0277778
trans	Tb11.1190	gene	1215	9920	Tb11.57.0008	gene	7228	15933	8706	0.0411186	0.0460704	0.0333328	0.0341738
trans	Tb11.57.0008	gene	12911	15467	Tb11.1200	gene	1	2557	2557	0.0364284	0.040118	0.0328429	0.0335301
trans	Tb927.1.5210	gene	66	113	Tb09.160.0050	gene	1	48	48	0.0357143	0.0357143	0	0
cis	Tb927_09_v4.snoRNA.0107	snoRNA	1	67	Tb09.160.1620	gene	184	250	67	0.0319149	0.0319149	0.0212766	0.0212766
cis	Tb09_snoRNA_0004	snoRNA	1	67	Tb09.160.1620	gene	184	250	67	0.0319149	0.0319149	0.0212766	0.0212766
trans	Tb09.244.1270	gene	43	125	Tb927.6.5220	pseudo	35	117	83	0.031746	0	0.037037	0.0291005
trans	Tb927.10.16260	pseudo	17	68	Tb09.v4.0141	pseudo	1404	1455	52	0.015625	0.015625	0	0
trans	Tb09.160.1620	gene	106	173	Tb09_snoRNA_0007	snoRNA	1	68	68	0.0104167	0.0104167	0.260417	0.260417
cis	Tb09.160.1630	gene	106	173	Tb09_snoRNA_0007	snoRNA	1	68	68	0.0104167	0.0104167	0.260417	0.260417
trans	Tb927_09_v4.snoRNA.0047	snoRNA	1	68	Tb09.160.1620	gene	106	173	68	0.0104167	0.0104167	0.260417	0.260417
trans	Tb927_09_v4.snoRNA.0046	snoRNA	1	68	Tb09.160.1630	gene	106	173	68	0.0104167	0.0104167	0.260417	0.260417
trans	Tb09_snoRNA_0003	snoRNA	1	68	Tb09.160.1630	gene	106	173	68	0.0104167	0.0104167	0.260417	0.260417
cis	Tb927_09_v4.snoRNA.0047	snoRNA	1	68	Tb09.160.1630	gene	106	173	68	0.0104167	0.0104167	0.260417	0.260417
cis	Tb927_09_v4.snoRNA.0046	snoRNA	1	68	Tb09.160.1620	gene	106	173	68	0.0104167	0.0104167	0.260417	0.260417
cis	Tb09_snoRNA_0003	snoRNA	1	68	Tb09.160.1620	gene	106	173	68	0.0104167	0.0104167	0.260417	0.260417
trans	Tb09.160.1620	gene	430	500	Tb09_snoRNA_0002	snoRNA	1	71	71	0.00980392	0.00980392	0.0588235	0.0588235
cis	Tb09.160.1620	gene	430	500	Tb927_09_v4.snoRNA.0055	snoRNA	1	71	71	0.00980392	0.00980392	0.0588235	0.0588235
cis	Tb09.160.1620	gene	430	500	Tb09_snoRNA_0006	snoRNA	1	71	71	0.00980392	0.00980392	0.0588235	0.0588235
trans	Tb927_09_v4.snoRNA.0054	snoRNA	1	71	Tb09.160.1620	gene	430	500	71	0.00980392	0.00980392	0.0588235	0.0588235
trans	Tb10.v4.0259	gene	535	729	Tb09.244.1630	gene	217	410	194	0.00571429	0	0.00571429	0.00285714
trans	Tb927.1.5150	gene	9	96	Tb927.10.40	gene	24	111	88	0.00490196	0.00490196	0	0
trans	Tb11.09.0005	gene	1	499	Tb927.10.16320	pseudo	743	1244	502	0.00208768	0	0.00208768	0.00626305
trans	Tb927.10.6940	gene	1	556	Tb10.v4.0250	pseudo	1	556	556	0.00124378	0.00124378	0.00932836	0.00932836
trans	Tb10.v4.0250	pseudo	1	556	Tb927.10.6970	gene	1	556	556	0.00124378	0.00124378	0.00932836	0.00932836
trans	Tb09.142.0320	gene	92	153	Tb09.160.5420	gene	302	363	62	0.000466853	0	0.0119048	0
trans	Tb11.17.0001	gene	4	456	Tb927.1.5260	gene	42	494	453	9.23788e-05	0	0.00230947	0.00461894
trans	Tb09.v4.0135	pseudo	12	51	Tb09.244.1270	gene	43	82	40	0	0	0.0666667	0.0916667
trans	Tb09.160.1620	gene	320	416	Tb09_snoRNA_0001	snoRNA	1	97	97	0	0	0.0779221	0.0779221
cis	Tb09_snoRNA_0005	snoRNA	1	97	Tb09.160.1620	gene	320	416	97	0	0	0.0779221	0.0779221
trans	Tb10.v4.0221	gene	23	88	Tb927.10.130	gene	14	79	66	0	0	0	0.0217391
trans	Tb09.244.0475	pseudo	1	72	Tb09.244.1270	gene	49	120	72	0	0	0.0192308	0.0192308
trans	Tb11.13.0003	pseudo	1	497	Tb927.10.16320	pseudo	748	1244	497	0	0	0.00209644	0.00628931
trans	Tb11.0260	pseudo	1	497	Tb927.10.16320	pseudo	748	1244	497	0	0	0.00209644	0.00628931
trans	Tb927.10.16350	pseudo	1397	1457	Tb927.10.16260	pseudo	9	69	61	0	0.0121951	0	0
trans	Tb927.10.16260	pseudo	181	236	Tb09.244.1860	pseudo	1174	1229	56	0	0	0	0
trans	Tb927.10.16260	pseudo	179	376	Tb11.24.0012	gene	1013	1210	198	0	0	0	0
trans	Tb927.10.16260	pseudo	144	236	Tb11.57.0027	gene	1174	1266	93	0	0	0.0136986	0
trans	Tb09.211.0650	gene	104	223	Tb09.211.1410	gene	1	120	120	0	0	0.01	0
trans	Tb11.0210	pseudo	63	207	Tb09.354.0050	gene	5	149	145	0	0	0	0
trans	Tb11.09.0012	pseudo	42	111	Tb09.244.1270	gene	56	125	70	0	0	0	0
cis	Tb927.10.7650	gene	21	82	Tb10_snRNA_2:snRNA	snRNA	1	62	62	0	0	0	0
trans	Tb927.10.16260	pseudo	15	69	Tb927.6.5620	pseudo	1344	1398	55	0	0.0142857	0	0
trans	Tb927.10.16260	pseudo	13	69	Tb927.6.5500	pseudo	1343	1399	57	0	0.0135135	0	0

## Sheet: S3
sense_transcripts	sense_type	sense_start	sense_end	anti_transcript	anti_type	anti_start	anti_end	length	AGO1_sense_density	AGO1_anti_density	PF_sense_density	PF_anti_density
Tb11.v4.0009	pseudo	657	858	Tb927.1.450	pseudo	5627	5828	202	1242.17	1220.66	59.0316	42.1603
Tb11.v4.0009	pseudo	657	858	Tb927.1.430	pseudo	5630	5831	202	1226.61	1216.32	58.6885	42.095
Tb11.v4.0009	pseudo	726	858	Tb927.10.16210	gene	756	888	133	1225.14	1258	37.3716	34.2586
Tb927.1.240	pseudo	5631	5832	Tb11.v4.0009	pseudo	657	858	202	1224.36	1215.33	57.5053	42.1431
Tb11.v4.0009	pseudo	657	858	Tb927.1.500	pseudo	5019	5220	202	1224.36	1215.33	57.5053	42.1431
Tb11.v4.0009	pseudo	657	858	Tb927.1.300	pseudo	5022	5223	202	1191.07	1139.91	57.0177	41.9754
ingi	ingi	4555	4756	Tb11.v4.0009	pseudo	657	858	202	1150.46	1071.46	46.0637	37.7116
Tb927.1.430	pseudo	1091	1413	Tb927.5.4710	pseudo	421	744	324	103.673	100.921	10.1423	9.79088
Tb09.v4.0143	pseudo	1	212	Tb927.1.430	pseudo	1091	1302	212	101.536	98.0729	14.0432	12.745
Tb927.5.4710	pseudo	421	751	Tb927.10.16200	gene	4	333	330	100.01	97.6302	9.66152	9.53657
Tb927.1.300	pseudo	469	809	Tb927.5.4710	pseudo	421	762	342	99.8224	98.81	9.66096	9.89709
Tb927.5.4710	pseudo	421	762	Tb927.1.450	pseudo	1076	1416	341	99.6149	98.823	9.64183	10.1319
Tb927.1.240	pseudo	1031	1371	Tb927.5.4710	pseudo	421	762	342	99.5763	99.0623	9.57262	10.0872
Tb09.v4.0143	pseudo	1	227	Tb927.1.450	pseudo	1079	1305	227	97.1691	96.715	13.1998	13.2458
Tb09.v4.0143	pseudo	1	227	Tb927.1.300	pseudo	472	698	227	97.0097	96.2174	13.1829	12.8327
Tb927.1.350	pseudo	471	697	Tb09.v4.0143	pseudo	1	227	227	97	96.9227	12.9052	13.0195
Tb927.1.240	pseudo	1034	1260	Tb09.v4.0143	pseudo	1	227	227	96.628	96.6087	13.0459	13.1275
Tb09.211.4940	gene	152	378	Tb09.v4.0143	pseudo	1	227	227	96.5797	95.657	13.1193	12.6883
Tb11.01.0560	gene	125	357	Tb927.5.4710	pseudo	519	751	233	96.277	94.4225	12.4398	11.6566
Tb927.1.350	pseudo	468	715	Tb927.5.4710	pseudo	514	762	249	95.8904	95.114	11.5666	12.3207
Tb09.211.4940	gene	149	395	Tb927.5.4710	pseudo	515	762	248	95.2907	93.7401	11.7861	12.0463
Tb09.v4.0143	pseudo	1	222	Tb927.10.16200	gene	1	222	222	95.1931	92.2327	13.1985	12.1257
Tb11.01.0560	gene	119	344	Tb09.v4.0143	pseudo	1	225	225	94.165	93.0437	13.1389	11.6142
Tb927.5.4710	pseudo	421	762	Tb927.1.500	pseudo	466	808	343	93.941	94.4348	9.58588	10.1655
ingi	ingi	4	235	Tb09.v4.0143	pseudo	1	232	232	93.1651	89.7075	11.7243	12.5129
ingi	ingi	5	342	Tb927.5.4710	pseudo	425	763	339	92.2013	88.8428	8.57529	9.42806
Tb09.v4.0143	pseudo	1	227	Tb927.1.500	pseudo	469	697	229	88.5121	89.9082	13.1235	13.3279
Tb927.10.110	pseudo	1	42	Tb11.21.0011	gene	1129	1170	42	84.3182	79.0909	1.33453	3.13772
Tb10.v4.0206	pseudo	1231	1263	Tb927.1.300	pseudo	5630	5662	33	81.3846	81.3846	0.318739	0.318739
Tb927.1.350	pseudo	927	959	Tb10.v4.0206	pseudo	1231	1263	33	81.3846	81.3846	0.318739	0.318739
Tb927.10.70	gene	23	55	Tb10.v4.0206	pseudo	1231	1263	33	81.3846	81.3846	0.318739	0.318739
Tb10.v4.0206	pseudo	1231	1263	Tb11.1780	pseudo	274	306	33	81.3846	81.3846	0.318739	0.318739
Tb10.v4.0084	pseudo	685	730	Tb927.10.110	pseudo	1	46	46	80	75.0385	1.14739	3.43637
ingi	ingi	5144	5193	Tb11.21.0011	gene	1123	1172	50	77.8333	78.2667	3.11217	2.41739
Tb11.21.0011	gene	1115	1172	Tb927.1.350	pseudo	910	967	58	73.6053	73.6053	2.02584	2.0296
Tb11.21.0011	gene	1115	1172	Tb927.1.300	pseudo	5613	5670	58	73.6053	73.6053	2.02584	2.0296
Tb927.2.820	pseudo	66	116	Tb11.21.0011	gene	1122	1172	51	73.3226	62.5806	1.3168	2.26501
Tb11.21.0011	gene	1115	1172	Tb11.v4.0027	pseudo	372	429	58	73.2895	73.6579	2.58563	2.04304
Tb11.21.0011	gene	1115	1172	Tb09.v4.0001	gene	6	63	58	73.2895	73.6579	2.58563	2.04304
Tb11.21.0011	gene	1115	1172	Tb11.1780	pseudo	257	314	58	72.6842	73.3421	2.02208	2.0296
Tb11.21.0011	gene	1115	1172	Tb927.10.70	gene	6	63	58	72.5263	72.6842	0.956291	2.02396
Tb11.21.0011	gene	1115	1170	Tb09.v4.0067	pseudo	8	64	57	72.4167	63.3056	2.71239	2.02882
Tb11.21.0011	gene	1115	1172	Tb927.1.430	pseudo	6221	6278	58	71.6579	70.9737	0.396611	2.02236
Tb11.21.0011	gene	1115	1172	Tb927.1.450	pseudo	6224	6281	58	69.9211	61.1842	1.19778	1.97725
Tb11.21.0011	gene	1115	1172	Tb927.1.500	pseudo	5612	5669	58	69.9211	61.1842	1.19778	1.97725
Tb11.21.0011	gene	1115	1172	Tb927.1.240	pseudo	6224	6281	58	69.8684	61.0789	1.19778	1.98101
Tb09.v4.0067	pseudo	1	55	Tb10.v4.0084	pseudo	683	737	55	67.8	67.9143	2.66887	2.67703
Tb11.01.2870	gene	274	328	Tb09.v4.0067	pseudo	1	55	55	67.4286	66.9714	2.66887	2.66887
Tb09.v4.0001	gene	1	57	Tb10.v4.0084	pseudo	681	737	57	66.8378	66.5676	2.62202	2.62202
Tb09.v4.0001	gene	1	57	Tb11.01.2870	gene	272	328	57	66.4865	65.6757	2.62202	2.6143
Tb927.10.70	gene	1	57	Tb10.v4.0084	pseudo	681	737	57	66.027	65.8378	0.948648	2.60513
Tb927.10.70	gene	1	57	Tb11.01.2870	gene	272	328	57	65.6757	64.9459	0.948648	2.59741
Tb927.1.350	pseudo	897	960	Tb11.01.2870	gene	273	336	64	65.3864	64.5	1.838	2.14613
Tb11.01.2870	gene	273	336	Tb927.1.300	pseudo	5600	5663	64	65.3864	64.5	1.838	2.14613
ingi	ingi	5131	5193	Tb11.01.2870	gene	274	336	63	65.0233	64.4186	2.36761	2.19818
Tb927.1.350	pseudo	901	960	Tb10.v4.0084	pseudo	682	741	60	64.275	63.95	1.83152	2.3526
Tb10.v4.0084	pseudo	682	741	Tb927.1.300	pseudo	5604	5663	60	64.275	63.95	1.83152	2.3526
Tb11.01.2870	gene	272	336	Tb11.v4.0027	pseudo	359	423	65	64.0444	63.4667	2.33613	2.17423
ingi	ingi	5135	5193	Tb10.v4.0084	pseudo	683	741	59	63.8462	63.8462	2.41528	2.41528
Tb11.01.2870	gene	273	336	Tb927.1.430	pseudo	6208	6271	64	63.6136	61.9091	0.419572	2.13476
Tb11.01.2870	gene	272	336	Tb11.1780	pseudo	244	308	65	63.2222	62.8444	1.69358	2.1651
Tb10.v4.0084	pseudo	681	741	Tb11.v4.0027	pseudo	363	423	61	62.8293	62.8293	2.37841	2.37841
Tb10.v4.0084	pseudo	682	741	Tb927.1.430	pseudo	6212	6271	60	62.325	61.1	0.271249	2.3401
Tb10.v4.0084	pseudo	681	741	Tb11.1780	pseudo	248	308	61	62.2439	62.2439	1.8439	2.36839
Tb927.1.240	pseudo	6211	6274	Tb11.01.2870	gene	273	336	64	62.1364	53.5	1.10825	2.0958
Tb927.2.820	pseudo	53	116	Tb11.01.2870	gene	273	336	64	62.1364	53.5	1.10825	2.0958
Tb11.01.2870	gene	273	336	Tb927.1.500	pseudo	5599	5662	64	62.1364	53.5	1.10825	2.0958
Tb11.01.2870	gene	273	336	Tb927.1.450	pseudo	6211	6274	64	62.1364	53.5	1.10825	2.0958
Tb10.v4.0084	pseudo	682	741	Tb927.1.450	pseudo	6215	6274	60	60.7	51.85	1.02879	2.29725
Tb927.1.240	pseudo	6215	6274	Tb10.v4.0084	pseudo	682	741	60	60.7	51.85	1.02879	2.29725
Tb927.2.820	pseudo	57	116	Tb10.v4.0084	pseudo	682	741	60	60.7	51.85	1.02879	2.29725
Tb10.v4.0084	pseudo	682	741	Tb927.1.500	pseudo	5603	5662	60	60.7	51.85	1.02879	2.29725
ingi	ingi	5110	5193	Tb09.v4.0074	pseudo	1231	1314	84	60	78.5938	3.63766	2.09036
Tb09.v4.0074	pseudo	1230	1314	Tb927.1.300	pseudo	5579	5663	85	59.8923	78.3846	3.18796	2.02769
Tb927.1.350	pseudo	876	960	Tb09.v4.0074	pseudo	1230	1314	85	59.8923	78.3846	3.18796	2.02769
Tb09.v4.0074	pseudo	1229	1314	Tb11.v4.0027	pseudo	338	423	86	59.4545	77.4697	3.57582	2.0765
Tb927.1.430	pseudo	6187	6271	Tb09.v4.0074	pseudo	1230	1314	85	59.0923	76.6769	2.29945	2.04828
Tb09.v4.0074	pseudo	1229	1314	Tb11.1780	pseudo	223	308	86	58.8636	77.0606	3.11498	2.07028
Tb927.1.240	pseudo	6190	6274	Tb09.v4.0074	pseudo	1230	1314	85	58.0923	70.9846	2.76563	2.02191
Tb09.v4.0074	pseudo	1230	1314	Tb927.1.450	pseudo	6190	6274	85	58.0923	70.9846	2.76563	2.02191
Tb09.v4.0074	pseudo	1230	1314	Tb927.1.500	pseudo	5578	5662	85	58.0923	70.9846	2.76563	2.02191
Tb927.2.820	pseudo	32	116	Tb09.v4.0074	pseudo	1230	1314	85	57.2615	70.0154	2.52321	1.94516
Tb927.8.6568	tRNA	1	72	Tb927.8.6566	tRNA	1	72	72	53.3846	53.3846	16.6346	16.6346
Tb09.v4.0056	pseudo	1	37	Tb927.1.430	pseudo	1091	1127	37	26.7647	27.8235	3.53865	2.94941
Tb927.3.5740	gene	5	280	Tb09.142.0410	gene	5	280	276	26.4805	25.082	8.20332	3.43613
Tb927.5.170	gene	1	329	Tb09.142.0410	gene	4	332	329	25.3689	26.2006	13.7029	12.6758
Tb927.3.5740	gene	53	305	Tb11.57.0077	gene	124	377	254	24.691	25.8069	3.4093	2.06366
Tb927.5.170	gene	101	417	Tb11.57.0077	gene	60	377	318	23.3939	25.0438	4.36227	4.68308
Tb09.v4.0001	gene	1	57	Tb09.v4.0074	pseudo	1229	1285	57	23.3243	55.0541	2.53806	0.204214
Tb927.10.70	gene	1	57	Tb09.v4.0074	pseudo	1229	1285	57	22.5135	54.3243	0.86469	0.187322
Tb09.v4.0152	gene	152	393	Tb927.3.5740	gene	37	277	241	22.018	23.6802	3.51854	1.6521
Tb09.v4.0056	pseudo	1	47	Tb927.10.16200	gene	1	47	47	21.8148	21.8889	2.46581	2.46581
Tb09.211.4940	gene	149	203	Tb09.v4.0056	pseudo	1	55	55	18.8857	18.9143	1.9022	1.93077
ingi	ingi	6	60	Tb09.v4.0056	pseudo	1	55	55	18.7714	18.4571	1.88791	1.65934
Tb09.v4.0056	pseudo	1	56	Tb927.1.450	pseudo	1075	1130	56	18.3889	18.4444	1.84936	1.87713
Tb927.1.240	pseudo	1030	1085	Tb09.v4.0056	pseudo	1	56	56	18.3889	18.4444	1.84936	1.87713
Tb09.v4.0056	pseudo	1	56	Tb927.1.300	pseudo	468	523	56	18.3889	18.4444	1.84936	1.87713
Tb09.v4.0056	pseudo	1	56	Tb927.1.500	pseudo	465	520	56	18.3889	18.4444	1.84936	1.87713
Tb927.1.350	pseudo	467	522	Tb09.v4.0056	pseudo	1	56	56	18.3889	18.4444	1.84936	1.87713
Tb09.v4.0152	gene	62	393	Tb927.5.170	gene	85	415	331	18.3718	22.0994	4.19902	2.0764
Tb11.01.0560	gene	113	168	Tb09.v4.0056	pseudo	1	56	56	18.25	17.25	1.85399	1.36965
Tb11.v4.0045	pseudo	1	37	Tb927.10.16200	gene	1	37	37	17	17	0.468289	0.468289
Tb11.v4.0045	pseudo	1	45	Tb927.1.300	pseudo	469	513	45	14.44	14.44	0.358436	0.358436
Tb11.v4.0045	pseudo	1	45	Tb927.1.450	pseudo	1076	1120	45	14.44	14.44	0.358436	0.358436
Tb927.1.240	pseudo	1031	1075	Tb11.v4.0045	pseudo	1	45	45	14.44	14.44	0.358436	0.358436
Tb927.1.350	pseudo	468	512	Tb11.v4.0045	pseudo	1	45	45	14.44	14.44	0.358436	0.358436
Tb11.v4.0045	pseudo	1	45	Tb927.1.500	pseudo	466	510	45	14.44	14.44	0.358436	0.358436
ingi	ingi	6	50	Tb11.v4.0045	pseudo	1	45	45	14.28	13.8	0.338436	0.0984365
Tb11.01.0560	gene	114	158	Tb11.v4.0045	pseudo	1	45	45	14.2	12.96	0.358436	0.317696
Tb09.211.4940	gene	148	193	Tb11.v4.0045	pseudo	1	46	46	13.9615	13.9615	0.34465	0.34465
Tb09.142.0440	gene	1	301	Tb09.244.2170	gene	117	416	300	5.40925	5.52313	0.459946	0.688937
Tb10.v4.0215	gene	90	389	Tb09.142.0440	gene	1	301	301	5.39643	4.96429	0.55982	0.671457
Tb927.6.810	gene	69	115	Tb927.6.810	gene	145	191	47	3.85185	3.81481	0.259259	0.259259
Tb05.5K5.290	gene	1	145	Tb927.10.90	gene	1	145	145	0.472	0.464	2.06034	1.76401
Tb927.10.90	gene	1	145	Tb927.1.3760	gene	1	145	145	0.472	0.456	2.04568	1.76401
Tb927.7.6880	gene	1	145	Tb927.10.90	gene	1	145	145	0.472	0.456	2.04568	1.76401
Tb927.2.1460	gene	1	145	Tb927.10.90	gene	1	145	145	0.472	0.48	1.88168	1.76401
Tb10.v4.0042	gene	1	145	Tb927.10.90	gene	1	145	145	0.472	0.464	1.87581	1.76401
Tb927.10.90	gene	1	145	Tb09.v4.0064	gene	1	145	145	0.472	0.48	1.86568	1.76401
Tb927.10.90	gene	1	145	Tb09.142.0300	pseudo	1	145	145	0.472	0.48	1.09448	1.76401
Tb927.3.510	gene	1	145	Tb927.10.90	gene	1	145	145	0.472	0.48	1.09314	1.76401
Tb927.6.3400	gene	1	145	Tb927.10.90	gene	1	145	145	0.472	0.448	1.00168	1.76401
Tb927.3.3420	pseudo	1	145	Tb927.10.90	gene	1	145	145	0.472	0.456	0.426477	1.76401
Tb927.5.4640	gene	1	145	Tb927.10.90	gene	1	145	145	0.464	0.48	1.47581	1.76301
Tb11.1520	gene	1	145	Tb927.10.90	gene	1	145	145	0.464	0.472	1.07886	1.75258
Tb09.142.0320	gene	92	153	Tb09.160.5420	gene	302	363	62	0.190476	0.047619	0.0119048	0
Tb927.1.430	pseudo	1021	1111	Tb11.0210	pseudo	198	288	91	0.169014	0.28169	0	0.0328638
Tb927.10.1020	gene	283	393	Tb927.10.7160	gene	1	111	111	0.164835	0.197802	0.137363	0.346154
Tb927.10.1020	gene	283	464	Tb927.10.10240	gene	179	360	182	0.141975	0.191358	0.0987654	0.234568
Tb11.1510	pseudo	1412	1466	Tb927.10.16260	pseudo	15	69	55	0.114286	0.0857143	0	0
Tb11.v4.0050	gene	1412	1466	Tb927.10.16260	pseudo	15	69	55	0.114286	0.0857143	0	0
Tb09.160.1620	gene	430	500	Tb927_09_v4.snoRNA.0055	snoRNA	1	71	71	0.0784314	0.0784314	0.0588235	0.0588235
Tb09.160.1620	gene	430	500	Tb09_snoRNA_0002	snoRNA	1	71	71	0.0784314	0.0784314	0.0588235	0.0588235
Tb09.160.1620	gene	430	500	Tb09_snoRNA_0006	snoRNA	1	71	71	0.0784314	0.0784314	0.0588235	0.0588235
Tb927_09_v4.snoRNA.0054	snoRNA	1	71	Tb09.160.1620	gene	430	500	71	0.0784314	0.0784314	0.0588235	0.0588235
Tb10.v4.0221	gene	23	88	Tb927.10.130	gene	14	79	66	0.0434783	0.0434783	0	0.0217391
Tb05.5K5.250	gene	401	456	Tb09.142.0360	gene	334	389	56	0.0277778	0	0.111111	0.111111
Tb11.17.0004	gene	81	142	Tb05.5K5.250	gene	395	456	62	0.0238095	0.0238095	0.130952	0.130952
Tb927.10.16260	pseudo	84	161	Tb10.v4.0187	pseudo	1252	1330	79	0.0172414	0.103448	0	0.0689655
Tb927.1.5150	gene	9	96	Tb927.10.40	gene	24	111	88	0.0147059	0	0	0
Tb09_snoRNA_0005	snoRNA	1	97	Tb09.160.1620	gene	320	416	97	0.012987	0.012987	0.0779221	0.0779221
Tb09.160.1620	gene	320	416	Tb09_snoRNA_0001	snoRNA	1	97	97	0.012987	0.012987	0.0779221	0.0779221
Tb11.0210	pseudo	63	207	Tb09.354.0050	gene	5	149	145	0.008	0.016	0	0
Tb11.1200	gene	147	1208	Tb11.47.0036	gene	1	1062	1062	0.00767754	0.00959693	0.0337729	0.0370968
Tb10.v4.0250	pseudo	1	556	Tb927.10.6970	gene	1	556	556	0.00746269	0.00746269	0.00932836	0.00932836
Tb927.10.6940	gene	1	556	Tb10.v4.0250	pseudo	1	556	556	0.00746269	0.00746269	0.00932836	0.00932836
Tb11.1190	gene	1215	9920	Tb11.57.0008	gene	7228	15933	8706	0.00656228	0.00667741	0.0333328	0.0341738
Tb11.57.0008	gene	12911	15467	Tb11.1200	gene	1	2557	2557	0.00630666	0.0059125	0.0328429	0.0335301
Tb11.1190	gene	6723	7784	Tb11.47.0036	gene	1	1062	1062	0.00575816	0.00959693	0.0337044	0.0363182
Tb11.13.0003	pseudo	1	497	Tb927.10.16320	pseudo	748	1244	497	0.00419287	0	0.00209644	0.00628931
Tb11.0260	pseudo	1	497	Tb927.10.16320	pseudo	748	1244	497	0.00419287	0	0.00209644	0.00628931
Tb11.09.0005	gene	1	499	Tb927.10.16320	pseudo	743	1244	502	0.00417537	0	0.00208768	0.00626305
Tb09_snoRNA_0003	snoRNA	1	68	Tb09.160.1620	gene	106	173	68	0	0	0.260417	0.260417
Tb09.160.1630	gene	106	173	Tb09_snoRNA_0007	snoRNA	1	68	68	0	0	0.260417	0.260417
Tb927_09_v4.snoRNA.0047	snoRNA	1	68	Tb09.160.1620	gene	106	173	68	0	0	0.260417	0.260417
Tb09.160.1620	gene	106	173	Tb09_snoRNA_0007	snoRNA	1	68	68	0	0	0.260417	0.260417
Tb927_09_v4.snoRNA.0047	snoRNA	1	68	Tb09.160.1630	gene	106	173	68	0	0	0.260417	0.260417
Tb927_09_v4.snoRNA.0046	snoRNA	1	68	Tb09.160.1620	gene	106	173	68	0	0	0.260417	0.260417
Tb09_snoRNA_0003	snoRNA	1	68	Tb09.160.1630	gene	106	173	68	0	0	0.260417	0.260417
Tb927_09_v4.snoRNA.0046	snoRNA	1	68	Tb09.160.1630	gene	106	173	68	0	0	0.260417	0.260417
Tb09.v4.0135	pseudo	12	51	Tb09.244.1270	gene	43	82	40	0	0.05	0.0666667	0.0916667
Tb09.244.1270	gene	43	125	Tb927.6.5220	pseudo	35	117	83	0	0.015873	0.037037	0.0291005
Tb09.160.1630	gene	184	239	Tb09_snoRNA_0008	snoRNA	1	56	56	0	0	0.0277778	0.0277778
Tb09_snoRNA_0004	snoRNA	12	67	Tb09.160.1630	gene	184	239	56	0	0	0.0277778	0.0277778
Tb927_09_v4.snoRNA.0107	snoRNA	12	67	Tb09.160.1630	gene	184	239	56	0	0	0.0277778	0.0277778
Tb09.160.1620	gene	184	239	Tb09_snoRNA_0008	snoRNA	1	56	56	0	0	0.0277778	0.0277778
Tb927_09_v4.snoRNA.0107	snoRNA	1	67	Tb09.160.1620	gene	184	250	67	0	0	0.0212766	0.0212766
Tb09_snoRNA_0004	snoRNA	1	67	Tb09.160.1620	gene	184	250	67	0	0	0.0212766	0.0212766
Tb09.244.0475	pseudo	1	72	Tb09.244.1270	gene	49	120	72	0	0	0.0192308	0.0192308
Tb927.10.16260	pseudo	144	236	Tb11.57.0027	gene	1174	1266	93	0	0	0.0136986	0
Tb09.211.0650	gene	104	223	Tb09.211.1410	gene	1	120	120	0	0	0.01	0
Tb10.v4.0259	gene	535	729	Tb09.244.1630	gene	217	410	194	0	0	0.00571429	0.00285714
Tb11.17.0001	gene	4	456	Tb927.1.5260	gene	42	494	453	0	0.00230947	0.00230947	0.00461894
Tb927.10.16260	pseudo	17	68	Tb09.v4.0141	pseudo	1404	1455	52	0	0	0	0
Tb927.1.5210	gene	66	113	Tb09.160.0050	gene	1	48	48	0	0	0	0
Tb927.10.16260	pseudo	13	69	Tb927.6.5500	pseudo	1343	1399	57	0	0	0	0
Tb927.10.16260	pseudo	15	69	Tb927.6.5620	pseudo	1344	1398	55	0	0	0	0
Tb927.10.16260	pseudo	179	376	Tb11.24.0012	gene	1013	1210	198	0	0	0	0
Tb11.09.0012	pseudo	42	111	Tb09.244.1270	gene	56	125	70	0	0	0	0
Tb927.10.16260	pseudo	181	236	Tb09.244.1860	pseudo	1174	1229	56	0	0	0	0
Tb927.10.7650	gene	21	82	Tb10_snRNA_2:snRNA	snRNA	1	62	62	0	0	0	0
Tb927.10.16350	pseudo	1397	1457	Tb927.10.16260	pseudo	9	69	61	0	0	0	0

## Sheet: S4
SF_id	SF_total number	PF_id	PF_total_number	P_value
#t0000142	6849	t0000007	57988	0
#t0000241	5059	t0000008	55158	0
#t0018906	78	t0000023	27534	0
#t0000197	5813	t0000033	22899	0
#t0001109	1513	t0000038	21299	0
#t0000195	5824	t0000041	19463	0
#t0003115	580	t0000044	18810	0
#t0024191	58	t0000049	17932	0
#t0000564	2616	t0000050	17742	0
#t0000171	6332	t0000052	17117	0
#t0029395	46	t0000059	15533	0
#t0000541	2748	t0000063	14025	0
#t0005113	350	t0000066	13023	0
#t0005275	338	t0000081	10587	0
#t0004160	436	t0000084	10245	0
#t0004734	381	t0000094	9748	0
#t0002515	712	t0000106	9060	0
#t0001550	1111	t0000107	8990	0
#t0013210	119	t0000108	8960	0
#t0000007	30157	t0000111	8919	0
#t0073702	14	t0000113	8663	0
#t0030529	44	t0000123	7879	0
#t0001151	1462	t0000124	7789	0
#t0371016	2	t0000135	7150	0
#t0002490	718	t0000139	6968	0
#t0000422	3295	t0000142	6930	0
#t0013737	114	t0000147	6857	0
#t0002204	813	t0000152	6537	0
#t0002020	880	t0000171	5872	0
#t0002248	797	t0000173	5785	0
#t0000838	1894	t0000177	5765	0
#t0024231	58	t0000188	5484	0
#t1636103	1	t0000195	5265	0
#t0002995	604	t0000219	4693	0
#t0000017	19640	t0000220	4672	0
#t0001097	1525	t0000228	4453	0
#t0002910	621	t0000236	4401	0
#t0006828	257	t0000237	4394	0
#t0006909	254	t0000247	4212	0
#t0002633	680	t0000252	4135	0
#t0092617	11	t0000254	4116	0
#t0003033	595	t0000256	4110	0
#t0138209	7	t0000263	4037	0
#t0001036	1597	t0000266	3968	0
#t0001037	1597	t0000269	3935	0
#t0005896	302	t0000284	3719	0
#t0006937	253	t0000285	3715	0
#t0003161	569	t0000292	3612	0
#t0050847	23	t0000299	3578	0
#t0003733	484	t0000301	3503	0
#t0007240	240	t0000319	3352	0
#t0003722	485	t0000320	3345	0
#t0009193	183	t0000321	3332	0
#t0011388	142	t0000323	3321	0
#t0001032	1599	t0000325	3303	1.8919e-211
#t0030947	43	t0000326	3300	0
#t0007318	237	t0000331	3256	0
#t0002543	706	t0000338	3187	0
#t0002425	739	t0000346	3124	0
#t0016641	91	t0000365	2985	0
#t0004640	388	t0000377	2886	0
#t0028564	47	t0000385	2861	0
#t0001264	1335	t0000389	2816	4.93887e-187
#t0007689	225	t0000390	2813	0
#t0008847	192	t0000394	2796	0
#t0116535	8	t0000398	2766	0
#t0000209	5570	t0000409	2703	5.76306e-123
#t0007388	235	t0000413	2674	0
#t0010286	160	t0000422	2612	0
#t0000176	6289	t0000428	2583	6.80029e-217
#t0000191	5883	t0000431	2573	2.61479e-174
#t0081596	13	t0000452	2473	0
#t0003319	546	t0000471	2381	0
#t0037406	34	t0000472	2376	0
#t0007455	233	t0000474	2368	0
#t0007690	225	t0000479	2339	0
#t0010075	164	t0000480	2335	0
#t0000005	30630	t0000489	2291	0
#t0008352	205	t0000490	2283	0
#t0004494	401	t0000501	2223	0
#t0070700	15	t0000505	2208	0
#t0010917	150	t0000509	2183	0
#t0002704	664	t0000510	2181	7.29485e-254
#t0009253	181	t0000518	2158	0
#t0020338	72	t0000526	2140	0
#t0014528	106	t0000530	2132	0
#t0022524	64	t0000536	2115	0
#t0009928	167	t0000545	2073	0
#t0010737	153	t0000550	2063	0
#t0006494	271	t0000552	2056	0
#t0005945	299	t0000556	2044	0
#t0002777	647	t0000558	2043	7.08366e-229
#t0003647	497	t0000560	2038	1.98305e-287
#t0004018	451	t0000571	1998	1.91003e-298
#t0003614	501	t0000575	1982	7.51122e-272
#t0002037	872	t0000587	1941	4.17168e-141
#t0009832	169	t0000589	1941	0
#t0002743	653	t0000590	1930	6.45257e-202
#t0014602	106	t0000591	1919	0
#t0004390	412	t0000600	1894	1.83328e-290
#t0000020	18807	t0000601	1890	0
#t0035920	36	t0000607	1880	0
#t0018495	80	t0000615	1862	0
#t0124919	7	t0000616	1861	0
#t0003407	531	t0000634	1804	3.21879e-217
#t0004582	393	t0000637	1785	1.31964e-271
#t0017738	84	t0000640	1773	0
#t0000006	30390	t0000648	1751	0
#t0064536	17	t0000650	1748	0
#t0002512	713	t0000652	1744	2.31476e-145
#t0050867	23	t0000659	1730	0
#t0033454	39	t0000665	1713	0
#t0004268	425	t0000683	1672	1.11869e-228
#t0118496	8	t0000689	1648	0
#t0015117	102	t0000693	1636	0
#t0005474	326	t0000697	1628	4.63714e-264
#t0286750	3	t0000700	1619	0
#t0012706	125	t0000744	1490	0
#t0004711	383	t0000751	1473	4.50471e-198
#t0006620	265	t0000759	1462	3.71495e-252
#t0037267	34	t0000760	1462	0
#t0003427	526	t0000767	1451	4.97166e-141
#t0019570	75	t0000768	1449	0
#t0021604	67	t0000781	1425	0
#t0002944	616	t0000783	1422	1.00361e-109
#t0000208	5581	t0000785	1418	0
#t0000254	4830	t0000802	1392	1.11942e-312
#t0028916	47	t0000805	1382	0
#t0000346	3864	t0000810	1374	5.94928e-180
#t0012484	127	t0000809	1374	3.68466e-318
#t0071325	15	t0000813	1368	0
#t0125503	7	t0000823	1359	0
#t0000268	4621	t0000835	1341	2.00879e-296
#t0009804	169	t0000834	1341	5.16306e-277
#t0000152	6575	t0000841	1328	0
#t0005531	323	t0000847	1324	1.74094e-187
#t0000065	10592	t0000849	1321	0
#t0008208	209	t0000853	1317	1.82559e-244
#t0014773	104	t0000854	1316	1.2652e-319
#t0007012	249	t0000862	1300	3.07913e-217
#t0062150	18	t0000866	1296	0
#t0033560	39	t0000869	1285	0
#t0002860	631	t0000871	1283	2.56089e-81
#t0018259	81	t0000872	1283	0
#t0072161	15	t0000870	1283	0
#t0009407	178	t0000875	1279	4.53328e-253
#t0037093	34	t0000879	1265	0
#t0000472	3056	t0000883	1261	1.94991e-105
#t0003236	559	t0000882	1261	2.56717e-94
#t0029810	45	t0000891	1252	0
#t0011146	146	t0000896	1245	5.45593e-265
#t0033980	38	t0000897	1243	0
#t0021469	67	t0000902	1240	0
#t0057497	20	t0000903	1239	0
#t0083194	12	t0000906	1235	0
#t0006537	269	t0000910	1229	1.75343e-188
#t0003517	515	t0000927	1199	5.32472e-94
#t0006006	296	t0000929	1198	3.33612e-168
#t0024775	57	t0000932	1195	0
#t0011859	135	t0000938	1187	8.91036e-256
#t0031407	42	t0000939	1182	0
#t0056435	20	t0000947	1174	0
#t0005926	300	t0000949	1173	2.55482e-160
#t0221801	4	t0000952	1165	0
#t0000658	2318	t0000988	1137	1.05019e-50
#t0241967	3	t0000992	1127	0
#t0019171	77	t0001005	1119	2.28101e-282
#t0093254	11	t0001006	1119	0
#t0030858	43	t0001018	1099	5.51486e-311
#t0031674	42	t0001027	1081	2.87818e-306
#t0005488	326	t0001029	1079	1.13703e-127
#t0021273	68	t0001033	1075	5.5477e-277
#t0037860	34	t0001034	1075	6.57537e-314
#t0012381	129	t0001035	1074	1.00168e-226
#t0003772	478	t0001040	1069	2.9141e-79
#t0131437	7	t0001047	1060	0
#t0029305	46	t0001048	1059	1.47628e-294
#t0009139	184	t0001059	1040	1.58818e-182
#t0048830	24	t0001062	1039	4.8171e-315
#t0120587	8	t0001064	1038	0
#t0000376	3589	t0001073	1028	6.66112e-235
#t0009887	168	t0001079	1022	9.40951e-187
#t0010279	160	t0001088	1007	2.49978e-187
#t0007269	239	t0001101	995	3.9901e-143
#t0006631	265	t0001116	983	5.20506e-129
#t0012931	122	t0001129	970	3.74346e-201
#t0010962	149	t0001132	969	2.38487e-183
#t0034337	38	t0001138	959	4.48768e-271
#t0029676	45	t0001143	955	5.68789e-262
#t0024922	56	t0001154	946	9.83249e-248
#t0006294	281	t0001171	933	5.0436e-111
#t0063752	17	t0001174	931	6.72628e-289
#t0010605	155	t0001183	920	3.87456e-166
#t0013365	117	t0001186	918	1.98127e-189
#t0015858	96	t0001205	904	2.3366e-200
#t0006221	284	t0001212	898	5.33618e-102
#t0012039	133	t0001211	898	3.2048e-173
#t0004575	394	t0001220	891	1.61249e-67
#t0004982	361	t0001226	890	4.78989e-76
#t0011836	135	t0001228	889	1.95561e-169
#t0018870	78	t0001233	886	4.11551e-209
#t0006247	282	t0001240	882	3.91442e-99
#t0011154	146	t0001238	882	7.08887e-161
#t0016343	93	t0001244	879	3.89053e-195
#t0005551	322	t0001248	878	4.75622e-85
#t0006633	265	t0001250	878	2.13755e-104
#t0032536	41	t0001254	876	9.08837e-241
#t0100317	10	t0001253	876	2.68553e-281
#t0164655	5	t0001252	876	3.06529e-290
#t0079383	13	t0001264	867	1.92268e-273
#t0142555	6	t0001262	867	2.83511e-285
#t0057918	20	t0001265	866	6.57152e-263
#t0109158	9	t0001268	859	3.15561e-277
#t0000052	11914	t0001273	857	0
#t0006881	255	t0001274	856	4.29613e-103
#t0132825	7	t0001286	846	2.61187e-276
#t0128429	7	t0001292	844	1.24705e-275
#t0016757	90	t0001295	842	2.53135e-186
#t0123911	8	t0001303	838	7.8537e-272
#t0050033	24	t0001307	837	5.7205e-248
#t0090403	11	t0001310	836	3.75012e-266
#t0000605	2446	t0001311	835	2.95046e-123
#t0067914	16	t0001317	832	3.40409e-257
#t0004994	360	t0001339	816	3.18853e-62
#t0000439	3217	t0001341	815	6.42796e-246
#t0219841	4	t0001343	813	9.65501e-271
#t0090180	11	t0001346	808	1.04215e-256
#t0071812	15	t0001347	807	2.81246e-250
#t0072410	15	t0001363	798	2.91248e-247
#t0004996	360	t0001387	784	2.16216e-56
#t0000227	5282	t0001396	780	0
#t0000221	5343	t0001404	774	0
#t0020872	70	t0001412	772	8.38443e-181
#t0007705	224	t0001415	769	9.08449e-95
#t0032178	41	t0001420	766	2.33383e-205
#t0007345	236	t0001429	759	5.36254e-88
#t0016770	90	t0001432	758	2.17672e-161
#t0023878	59	t0001435	757	1.78438e-185
#t0042321	29	t0001445	748	1.32212e-212
#t0050039	24	t0001450	746	6.24685e-218
#t0000194	5830	t0001457	742	0
#t0018505	80	t0001461	737	1.95216e-162
#t0033537	39	t0001463	737	4.03583e-198
#t0020734	70	t0001464	736	7.74431e-170
#t0011691	138	t0001468	734	5.39839e-125
#t0137578	7	t0001482	730	5.81363e-237
#t0009221	182	t0001485	729	2.19315e-102
#t0000484	3001	t0001494	721	1.00224e-243
#t0055768	21	t0001497	720	4.05787e-213
#t0016341	93	t0001509	712	7.18356e-146
#t0146364	6	t0001512	711	2.83954e-232
#t0022084	65	t0001516	707	4.99149e-165
#t0014683	105	t0001526	704	8.37564e-136
#t0016678	90	t0001528	703	2.73933e-145
#t0067119	16	t0001537	699	9.16318e-213
#t0303494	3	t0001541	699	7.0298e-234
#t0020757	70	t0001545	697	4.93801e-158
#t0000912	1790	t0001547	696	3.29015e-71
#t0014884	104	t0001549	695	7.00314e-134
#t0178289	5	t0001561	689	1.30788e-226
#t0092041	11	t0001568	687	5.73747e-216
#t0007550	230	t0001585	678	3.73904e-72
#t0012005	133	t0001581	678	1.0858e-112
#t0034577	38	t0001586	678	2.95974e-180
#t0048807	24	t0001590	676	6.33401e-195
#t0091333	11	t0001604	669	6.4274e-210
#t0009689	172	t0001612	666	2.98028e-91
#t0008253	208	t0001619	660	8.58544e-76
#t0029851	45	t0001632	652	2.91401e-165
#t0045173	27	t0001648	648	2.70615e-182
#t0026841	51	t0001655	643	4.43661e-157
#t0000510	2880	t0001657	640	6.63958e-254
#t0062439	18	t0001660	638	7.70964e-190
#t0010706	153	t0001663	636	3.70592e-92
#t0083016	12	t0001661	636	2.29319e-197
#t0021927	65	t0001674	628	4.15052e-141
#t0000905	1799	t0001682	627	4.92775e-88
#t0034712	37	t0001681	627	5.43055e-165
#t0016625	91	t0001689	624	6.58596e-122
#t0000374	3603	t0001694	622	0
#t0398348	2	t0001698	620	5.44194e-209
#t0006935	253	t0001702	619	5.38326e-53
#t0013510	116	t0001706	618	1.11902e-105
#t0353730	2	t0001705	618	2.62446e-208
#t0000400	3410	t0001713	616	0
#t0000774	2028	t0001716	615	1.74233e-123
#t0028209	48	t0001736	609	3.82277e-149
#t0000350	3829	t0001737	608	0
#t0001173	1430	t0001739	607	2.80426e-47
#t0057927	20	t0001747	603	8.8289e-176
#t0324538	2	t0001748	602	7.67368e-203
#t0032377	41	t0001751	601	6.16972e-153
#t0102972	10	t0001753	601	1.39614e-188
#t0007073	247	t0001754	600	6.01516e-51
#t0091347	11	t0001755	600	9.20576e-187
#t0009211	182	t0001758	599	1.89554e-71
#t0031551	42	t0001768	595	3.94332e-150
#t0000527	2801	t0001772	594	1.52872e-258
#t0019847	74	t0001771	594	1.72864e-124
#t0041864	30	t0001775	593	3.13184e-161
#t0001072	1552	t0001790	589	4.07445e-65
#t0006278	281	t0001795	587	4.71867e-40
#t1445594	1	t0001803	584	6.7296e-199
#t0007867	219	t0001809	581	3.4901e-55
#t0000304	4246	t0001816	578	0
#t0001365	1245	t0001814	578	5.22893e-33
#t0023657	60	t0001818	577	1.32957e-129
#t0000631	2386	t0001823	573	2.44954e-194
#t0029862	45	t0001834	569	2.39518e-139
#t0347170	2	t0001841	568	3.14861e-191
#t0007980	215	t0001852	564	6.56464e-53
#t0053297	22	t0001857	563	2.69098e-160
#t0159936	6	t0001859	563	4.16819e-182
#t0017797	84	t0001869	560	3.71925e-108
#t0001517	1135	t0001890	555	4.45987e-26
#t0475717	2	t0001888	555	8.6623e-187
#t0019471	75	t0001892	554	3.33452e-112
#t0031386	42	t0001891	554	2.56299e-137
#t0000916	1782	t0001897	553	3.69537e-105
#t0042921	29	t0001906	549	3.89332e-148
#t0031830	42	t0001910	548	1.88963e-135
#t0000683	2262	t0001913	546	2.49698e-183
#t0113489	8	t0001914	546	3.87226e-173
#t0386194	2	t0001917	546	1.02534e-183
#t0078496	13	t0001918	545	1.42864e-165
#t0079194	13	t0001936	539	1.41794e-163
#t0000100	8206	t0001951	536	0
#t0012021	133	t0001960	533	1.88005e-75
#t0015745	97	t0001957	533	4.37843e-93
#t0113058	8	t0001973	529	2.04651e-167
#t0007070	247	t0001979	528	1.4666e-37
#t0011804	136	t0001980	528	6.24871e-73
#t0023903	59	t0001984	528	1.03958e-115
#t0147310	6	t0001988	526	1.3708e-169
#t0210782	4	t0001989	526	4.84773e-173
#t0052170	22	t0001990	525	6.51149e-148
#t0025519	54	t0002007	522	1.17561e-117
#t0028442	48	t0002010	522	2.26897e-122
#t0008740	195	t0002018	519	1.05698e-49
#t0044261	28	t0002017	519	1.5141e-139
#t0080359	13	t0002020	518	1.36396e-156
#t0001692	1032	t0002032	514	1.4009e-22
#t0012452	128	t0002036	512	1.86415e-72
#t0013605	115	t0002035	512	2.284e-78
#t0030279	44	t0002042	511	2.72744e-122
#t0013772	113	t0002044	510	8.28327e-79
#t0000841	1886	t0002050	508	8.18725e-135
#t0001201	1397	t0002052	508	8.35749e-64
#t0012905	122	t0002053	508	4.01459e-74
#t0038377	33	t0002066	502	3.10911e-129
#t0000675	2284	t0002069	501	1.87605e-204
#t0001753	1004	t0002072	500	5.02178e-22
#t1625577	1	t0002071	500	3.76853e-170
#t0027472	50	t0002098	491	2.14073e-111
#t0018846	78	t0002102	490	3.77705e-92
#t0056402	20	t0002101	490	8.84946e-139
#t0001042	1588	t0002107	489	5.04144e-95
#t0036748	35	t0002110	488	5.53355e-123
#t0036500	35	t0002113	488	5.53355e-123
#t0102971	10	t0002123	486	4.83516e-150
#t0019417	76	t0002128	485	5.91836e-92
#t0007338	237	t0002141	482	7.74155e-32
#t0020878	70	t0002156	479	5.75937e-94
#t0061030	18	t0002151	479	1.71652e-137
#t0012391	129	t0002166	478	9.23613e-64
#t0023440	60	t0002167	477	5.66832e-100
#t0035255	37	t0002185	473	1.5864e-116
#t0007587	228	t0002189	472	3.96275e-32
#t0073022	15	t0002195	471	1.81182e-138
#t0096364	10	t0002199	470	1.07115e-144
#t0110539	9	t0002203	470	4.07059e-146
#t0000026	15887	t0002206	469	0
#t0230489	4	t0002214	468	2.40214e-153
#t0042041	29	t0002216	467	5.59168e-122
#t0579787	1	t0002215	467	7.36168e-159
#t0016469	92	t0002220	466	8.48081e-78
#t0063396	18	t0002226	465	6.46763e-133
#t0000903	1801	t0002227	464	5.69618e-136
#t0020556	71	t0002231	463	8.05849e-89
#t0007697	225	t0002238	462	4.44872e-31
#t0008140	211	t0002246	461	3.73378e-34
#t0027439	50	t0002245	461	2.12059e-102
#t0009624	173	t0002262	458	8.04385e-44
#t0008053	213	t0002267	456	8.795e-33
#t0265116	3	t0002269	456	4.49426e-151
#t0000662	2306	t0002274	455	8.80506e-228
#t0011651	138	t0002272	455	7.39125e-55
#t0010946	149	t0002280	454	1.0709e-50
#t0026978	51	t0002279	454	1.40852e-99
#t0001006	1637	t0002289	452	1.08397e-113
#t0001261	1338	t0002291	452	1.34036e-69
#t0182782	5	t0002296	451	7.04053e-146
#t0072797	15	t0002301	450	1.4826e-131
#t0015712	97	t0002308	449	7.92826e-71
#t0001268	1331	t0002318	447	6.38805e-70
#t0016244	93	t0002315	447	2.76746e-72
#t0014636	106	t0002324	446	7.91372e-66
#t0159424	6	t0002325	446	1.4285e-142
#t0083501	12	t0002341	442	1.10436e-132
#t0009365	179	t0002354	441	1.11144e-38
#t0011314	143	t0002348	441	6.63823e-50
#t0024711	57	t0002358	440	3.02035e-91
#t0055286	21	t0002357	440	1.85662e-121
#t0057945	20	t0002362	439	3.25085e-122
#t0010227	161	t0002365	438	2.38965e-43
#t0199734	4	t0002363	438	3.61221e-143
#t0056171	20	t0002374	435	6.40956e-121
#t0494440	2	t0002380	434	1.71075e-145
#t0000366	3651	t0002384	433	0
#t0009223	182	t0002383	433	2.5943e-36
#t0186302	5	t0002393	432	1.87454e-139
#t0000163	6427	t0002416	428	0
#t0100370	10	t0002414	428	1.09018e-130
#t0080194	13	t0002421	427	1.90888e-126
#t0108923	9	t0002420	427	9.79374e-132
#t0041260	30	t0002450	421	1.53164e-106
#t0000595	2503	t0002454	420	1.10868e-281
#t0001379	1239	t0002458	419	1.72398e-64
#t0011279	144	t0002472	417	2.53464e-44
#t0013519	116	t0002470	417	1.76239e-54
#t0055905	21	t0002471	417	4.82172e-114
#t0070176	15	t0002467	417	1.01434e-120
#t0009136	184	t0002483	415	2.09074e-32
#t0017398	86	t0002480	415	1.99593e-67
#t0023098	62	t0002492	413	2.87758e-80
#t0000066	10554	t0002498	412	0
#t0037262	34	t0002495	412	3.19047e-100
#t0011122	147	t0002513	409	1.18378e-41
#t0089844	11	t0002508	409	4.81385e-123
#t0035868	36	t0002514	408	2.57166e-97
#t0023329	61	t0002523	407	3.4235e-79
#t0010837	151	t0002532	405	1.40477e-39
#t0052894	22	t0002545	403	1.61782e-108
#t0000681	2269	t0002554	402	3.73278e-245
#t0002182	820	t0002550	402	3.26385e-19
#t0160636	5	t0002547	402	2.56786e-129
#t0068194	16	t0002558	401	2.51868e-114
#t0002055	866	t0002564	400	7.26184e-24
#t0022856	62	t0002571	399	2.52656e-76
#t0028871	47	t0002569	399	3.49655e-86
#t0002095	851	t0002578	398	1.03454e-22
#t0010528	156	t0002585	396	2.84433e-36
#t0031201	43	t0002595	395	6.62677e-88
#t0031450	42	t0002593	395	1.18588e-88
#t1400927	1	t0002594	395	3.11559e-134
#t0012148	132	t0002605	393	4.01293e-43
#t0131289	7	t0002610	392	6.95181e-123
#t0046257	26	t0002612	391	8.36561e-101
#t0045448	27	t0002620	390	1.46476e-99
#t0077605	14	t0002621	390	4.69785e-113
#t0837506	1	t0002617	390	1.59677e-132
#t0035116	37	t0002624	388	2.10208e-90
#t0002022	879	t0002632	387	2.41279e-27
#t0000501	2914	t0002637	386	0
#t0014670	105	t0002648	384	4.62926e-51
#t0022604	63	t0002650	384	1.53637e-71
#t0002066	864	t0002653	383	1.83746e-26
#t0050495	23	t0002660	381	1.66358e-100
#t0000757	2080	t0002669	380	1.76095e-219
#t0075322	14	t0002668	380	8.87353e-110
#t0096845	10	t0002663	380	9.90861e-115
#t0227701	4	t0002665	380	1.62133e-123
#t0001368	1243	t0002671	379	6.41075e-76
#t0109181	9	t0002673	379	9.96607e-116
#t0036751	35	t0002678	378	5.83101e-89
#t0000748	2111	t0002688	375	9.15454e-228
#t0019054	77	t0002689	375	1.76796e-61
#t0039612	32	t0002693	374	3.37466e-90
#t0016823	89	t0002702	372	5.65875e-55
#t0101467	10	t0002703	372	4.46364e-112
#t0016592	91	t0002705	371	7.88861e-54
#t0066852	16	t0002706	371	1.46596e-104
#t0014286	109	t0002718	369	5.80402e-46
#t0191503	4	t0002719	368	1.86739e-119
#t0000614	2423	t0002726	367	2.9057e-293
#t0034925	37	t0002733	366	9.55827e-84
#t0073198	15	t0002734	366	4.70154e-104
#t0000893	1816	t0002736	365	6.1466e-177
#t0015081	102	t0002741	365	9.47113e-48
#t0029435	46	t0002745	364	1.29652e-76
#t0026958	51	t0002750	363	5.32064e-73
#t0183397	5	t0002754	363	3.7091e-116
#t0262247	3	t0002761	362	3.98448e-119
#t0000638	2374	t0002769	360	3.75546e-287
#t0039335	32	t0002783	359	1.35497e-85
#t0038117	33	t0002785	358	1.78322e-84
#t0047799	25	t0002790	358	2.38471e-91
#t0000384	3536	t0002794	357	0
#t0000840	1889	t0002803	356	1.70792e-194
#t0050020	24	t0002800	356	1.20962e-91
#t0017692	84	t0002831	352	3.19304e-52
#t0029367	46	t0002829	352	4.01237e-73
#t0039102	32	t0002837	351	3.78755e-83
#t0052985	22	t0002841	351	5.91793e-92
#t0001501	1144	t0002844	350	1.07084e-69
#t0011152	146	t0002842	350	5.03731e-30
#t0011577	140	t0002845	350	1.11001e-31
#t0011240	145	t0002856	347	1.02518e-29
#t0015876	96	t0002866	346	1.21071e-45
#t0045395	27	t0002865	346	8.19706e-86
#t0027855	49	t0002870	345	3.87793e-69
#t0042358	29	t0002884	344	1.76413e-83
#t0001543	1116	t0002903	342	7.04353e-68
#t0019236	76	t0002894	342	2.09632e-53
#t0296702	3	t0002898	342	2.44289e-112
#t0013770	113	t0002905	341	3.36515e-38
#t0023146	61	t0002908	340	1.3633e-60
#t0069175	16	t0002912	340	1.62617e-94
#t0001043	1586	t0002918	339	2.88937e-146
#t0015995	95	t0002926	338	3.79506e-44
#t0023857	59	t0002924	338	3.64252e-61
#t0001240	1356	t0002935	337	2.94649e-107
#t0001187	1411	t0002938	336	6.95238e-117
#t0001570	1092	t0002942	336	4.48152e-66
#t0019691	74	t0002941	336	8.02225e-53
#t0000219	5364	t0002955	334	0
#t0014149	110	t0002956	334	1.09028e-37
#t0027285	50	t0002959	334	2.22551e-65
#t0011127	146	t0002962	333	8.44843e-27
#t0112290	9	t0002969	333	1.91484e-100
#t0010302	160	t0002972	332	2.98173e-23
#t0134895	7	t0002973	332	8.46179e-103
#t0119165	8	t0002979	331	4.24865e-101
#t0000291	4392	t0002985	330	0
#t0002311	772	t0002987	330	5.31568e-26
#t0037361	34	t0002991	330	3.30158e-75
#t0264378	3	t0002992	330	2.87316e-108
#t0000584	2552	t0003013	327	0
#t0033610	39	t0003006	327	1.21576e-70
#t0012374	129	t0003018	326	4.8686e-30
#t0047416	25	t0003020	326	2.40031e-81
#t0170672	5	t0003022	326	1.07524e-103
#t0030784	43	t0003026	325	2.61181e-67
#t0073394	15	t0003029	325	9.64621e-91
#t0104337	9	t0003031	324	1.83898e-97
#t0014064	111	t0003039	323	5.94251e-35
#t0000217	5380	t0003055	321	0
#t0000673	2286	t0003061	319	7.01007e-292
#t0105853	9	t0003066	319	8.32244e-96
#t0259974	3	t0003067	319	1.54218e-104
#t0015940	96	t0003075	318	4.18553e-39
#t0002820	639	t0003086	317	7.55198e-15
#t0000064	10607	t0003090	316	0
#t0063427	18	t0003095	316	9.79423e-85
#t0015850	96	t0003109	314	3.44176e-38
#t0129976	7	t0003116	313	1.85882e-96
#t0160961	5	t0003111	313	2.53494e-99
#t0048648	24	t0003118	312	7.20935e-78
#t0105709	9	t0003129	311	3.6932e-93
#t0017915	83	t0003142	310	2.52488e-42
#t0064506	17	t0003151	309	1.6756e-83
#t0278627	3	t0003159	307	1.79991e-100
#t0056991	20	t0003166	306	1.27e-79
#t0141066	6	t0003177	304	7.62112e-95
#t0061255	18	t0003194	302	2.83016e-80
#t0080039	13	t0003200	302	1.78815e-85
#t0040812	31	t0003216	300	1.7854e-68
#t0243452	3	t0003211	300	4.23495e-98
#t0074912	14	t0003221	299	2.07053e-83
#t0095015	11	t0003224	299	8.97796e-87
#t0017768	84	t0003236	296	1.38116e-38
#t0049839	24	t0003249	295	1.35478e-72
#t0051581	23	t0003250	295	1.85508e-73
#t0049500	24	t0003253	294	2.76156e-72
#t0279467	3	t0003254	294	4.56138e-96
#t0048279	25	t0003274	292	7.98857e-71
#t0055170	21	t0003269	292	2.68515e-74
#t0011368	142	t0003280	291	3.24634e-20
#t0102602	10	t0003284	291	2.47002e-85
#t0001849	955	t0003290	290	3.76664e-59
#t0087788	12	t0003291	290	1.09426e-82
#t0106835	9	t0003292	290	3.19194e-86
#t0278641	3	t0003293	289	2.25026e-94
#t0043999	28	t0003309	287	7.18692e-67
#t0000210	5554	t0003321	286	0
#t0001816	972	t0003316	286	7.09842e-63
#t0000034	13577	t0003328	285	0
#t0042939	29	t0003334	285	1.72469e-65
#t0001433	1201	t0003346	284	1.49484e-100
#t0032092	41	t0003342	284	7.82936e-57
#t0069914	16	t0003347	284	1.62593e-76
#t0120679	8	t0003337	284	1.6975e-85
#t0000056	11486	t0003356	283	0
#t0026595	52	t0003361	282	8.13901e-50
#t0013294	118	t0003369	281	2.86165e-24
#t0039999	31	t0003382	280	1.7268e-62
#t0102251	10	t0003397	278	4.5575e-81
#t0133459	7	t0003395	278	8.35831e-85
#t0064730	17	t0003404	277	2.64926e-73
#t0001219	1377	t0003414	276	5.03668e-135
#t0012526	127	t0003418	275	7.17941e-21
#t0046374	26	t0003426	275	8.29666e-65
#t0065198	17	t0003416	275	1.14215e-72
#t0402415	2	t0003431	274	5.29422e-91
#t0124101	8	t0003444	273	7.39698e-82
#t0039688	32	t0003453	272	2.15145e-59
#t0069890	16	t0003457	272	1.0923e-72
#t0196861	4	t0003448	272	4.84166e-87
#t0016435	92	t0003466	270	8.56694e-30
#t0021508	67	t0003477	270	2.29101e-39
#t0107585	9	t0003478	270	1.23652e-79
#t0026961	51	t0003479	269	7.44114e-47
#t0050132	24	t0003488	269	1.36673e-64
#t0295282	3	t0003483	269	1.32082e-87
#t0001203	1396	t0003501	267	1.57321e-142
#t0012933	122	t0003497	267	1.24267e-20
#t0050400	23	t0003493	267	8.39525e-65
#t0002694	667	t0003504	266	2.11658e-26
#t0001303	1304	t0003525	265	2.06613e-126
#t0026115	53	t0003515	265	9.6954e-45
#t0041945	30	t0003531	265	9.26227e-59
#t0070418	15	t0003521	265	1.907e-71
#t0141974	6	t0003519	265	8.11696e-82
#t0046619	26	t0003538	264	1.80355e-61
#t0051510	23	t0003540	264	7.01231e-64
#t0229288	4	t0003542	264	2.38932e-84
#t0446925	2	t0003536	264	1.32524e-87
#t0017145	88	t0003553	263	1.29639e-29
#t0198048	4	t0003550	263	5.18593e-84
#t0027608	49	t0003554	262	4.78512e-46
#t0020261	72	t0003568	261	4.4842e-35
#t0049074	24	t0003572	261	3.8144e-62
#t0027682	49	t0003578	260	1.65162e-45
#t0374457	2	t0003583	260	3.02939e-86
#t0024612	57	t0003606	258	6.33008e-41
#t0000242	5058	t0003612	257	0
#t0001588	1083	t0003634	255	2.71907e-91
#t0002473	723	t0003637	255	7.38134e-36
#t0166298	5	t0003641	255	7.28994e-80
#t0033092	40	t0003651	254	5.67556e-49
#t0770331	1	t0003650	254	4.69876e-86
#t0000015	21625	t0003665	253	0
#t0001358	1252	t0003654	253	4.51021e-122
#t0012893	122	t0003657	253	3.82558e-18
#t0144376	6	t0003659	253	8.08264e-78
#t0001409	1220	t0003675	252	1.14012e-116
#t0026591	52	t0003673	252	7.9875e-42
#t0152876	6	t0003671	252	1.73975e-77
#t0002701	665	t0003695	251	2.46229e-29
#t0000428	3253	t0003700	250	0
#t0000442	3202	t0003705	250	0
#t0002525	709	t0003704	250	3.23488e-35
#t0025010	56	t0003708	249	4.29847e-39
#t0001353	1255	t0003719	248	8.41764e-125
#t0001861	950	t0003713	248	1.31437e-71
#t0003529	513	t0003716	248	3.42706e-13
#t0014607	106	t0003718	248	3.81062e-21
#t0000684	2259	t0003724	247	0
#t0034911	37	t0003727	247	7.79259e-49
#t0044357	28	t0003730	247	7.21256e-55
#t0328932	2	t0003722	247	7.88657e-82
#t0925373	1	t0003728	247	1.15147e-83
#t0001160	1441	t0003734	246	5.05432e-161
#t0045533	27	t0003742	246	2.65344e-55
#t0143816	6	t0003737	246	1.72683e-75
#t0000427	3282	t0003751	245	0
#t0000198	5785	t0003765	244	0
#t0000325	4060	t0003763	244	0
#t0002565	702	t0003766	244	9.46076e-36
#t0024153	58	t0003756	244	6.74015e-37
#t0042845	29	t0003778	243	5.71115e-53
#t0002273	788	t0003788	242	2.23963e-48
#t0018120	82	t0003785	242	4.70665e-27
#t0003742	483	t0003816	240	1.35014e-11
#t0050630	23	t0003810	240	1.50066e-56
#t0197518	4	t0003809	240	2.80833e-76
#t0000383	3541	t0003839	238	0
#t0000967	1702	t0003836	238	1.33176e-217
#t0000067	10499	t0003853	237	0
#t0001698	1030	t0003854	237	4.95727e-89
#t0018763	79	t0003851	237	5.6419e-27
#t0103924	9	t0003846	237	8.24899e-69
#t0002077	857	t0003856	236	1.01887e-60
#t0003103	581	t0003860	236	2.24095e-22
#t0035238	37	t0003861	236	9.78924e-46
#t0051622	23	t0003859	236	2.45336e-55
#t0002516	712	t0003867	235	2.06969e-39
#t0017367	86	t0003880	235	2.87716e-24
#t0035901	36	t0003866	235	4.6141e-46
#t0048854	24	t0003870	235	2.92698e-54
#t0090247	11	t0003875	235	6.16901e-66
#t0016947	89	t0003890	234	3.8054e-23
#t0033705	39	t0003883	234	5.39797e-44
#t0002888	626	t0003907	233	1.86194e-28
#t1323677	1	t0003902	233	6.8985e-79
#t0018218	81	t0003917	232	3.18251e-25
#t0000130	7138	t0003932	231	0
#t0002909	622	t0003933	231	2.11119e-28
#t0052739	22	t0003937	231	1.31595e-54
#t1498097	1	t0003936	231	3.31997e-78
#t0002374	753	t0003951	230	1.12369e-46
#t0272778	3	t0003956	230	1.98791e-74
#t1619330	1	t0003955	230	7.28302e-78
#t0003148	572	t0003960	229	9.98083e-23
#t0038477	33	t0003959	229	3.12804e-46
#t0001311	1299	t0003982	228	2.53838e-142
#t0000084	9085	t0003992	227	0
#t0048644	24	t0003988	227	7.42623e-52
#t0001424	1211	t0004003	226	1.74047e-126
#t0071136	15	t0004008	226	4.5916e-59
#t0022848	62	t0004021	225	1.5852e-30
#t0028199	48	t0004026	225	9.17433e-37
#t0002103	848	t0004032	224	3.01732e-63
#t0013993	111	t0004052	223	1.95773e-15
#t1030819	1	t0004055	223	1.77962e-75
#t0947758	1	t0004067	222	3.90336e-75
#t0964344	1	t0004069	222	3.90336e-75
#t0073767	14	t0004077	221	1.99497e-58
#t0413684	2	t0004085	221	5.25597e-73
#t0000039	12796	t0004096	220	0
#t0002954	613	t0004093	220	8.69291e-30
#t0003459	522	t0004111	219	6.03488e-19
#t0003485	519	t0004113	219	1.3028e-18
#t0024868	56	t0004110	219	1.43031e-31
#t0122802	8	t0004124	218	9.42823e-64
#t0002825	639	t0004139	217	5.41658e-34
#t1546731	1	t0004137	217	1.98092e-73
#t0000352	3807	t0004145	216	0
#t0044973	27	t0004157	216	1.93949e-46
#t0072919	15	t0004152	216	6.45828e-56
#t0160669	5	t0004143	216	7.72885e-67
#t1406330	1	t0004150	216	4.34435e-73
#t0001590	1082	t0004175	215	2.27663e-107
#t0002551	705	t0004168	215	6.34174e-44
#t0023674	60	t0004165	215	5.98023e-29
#t0025990	53	t0004166	215	6.87553e-32
#t0034394	38	t0004163	215	2.43802e-39
#t0017467	86	t0004187	214	5.47598e-20
#t0238776	3	t0004189	213	1.07578e-68
#t0000686	2256	t0004209	212	0
#t0022474	64	t0004208	212	1.05205e-26
#t0087382	12	t0004210	212	1.64751e-57
#t1394486	1	t0004217	211	2.20334e-71
#t0024552	57	t0004237	210	5.73063e-29
#t0053678	22	t0004239	210	2.913e-48
#t0100603	10	t0004228	210	6.35655e-59
#t0101572	10	t0004236	210	6.35655e-59
#t0131189	7	t0004244	210	2.60748e-62
#t0000240	5071	t0004255	209	0
#t0000388	3514	t0004252	209	0
#t0001803	980	t0004263	209	2.19758e-91
#t0002255	794	t0004262	209	1.34754e-59
#t0118674	8	t0004247	209	8.30876e-61
#t0941683	1	t0004258	209	1.05945e-70
#t0031749	42	t0004274	208	2.55828e-35
#t0147469	6	t0004280	208	7.00836e-63
#t0026658	52	t0004309	206	4.23599e-30
#t0027889	49	t0004302	206	1.97868e-31
#t0401612	2	t0004311	206	6.39922e-68
#t0000752	2095	t0004326	205	5.43472e-323
#t0001907	930	t0004328	205	4.03709e-84
#t0026648	52	t0004324	205	7.46804e-30
#t0045892	26	t0004336	204	1.28058e-43
#t1667058	1	t0004343	204	5.36907e-69
#t0000237	5119	t0004353	203	0
#t0001966	902	t0004348	203	5.39629e-80
#t0003963	456	t0004349	203	1.11069e-14
#t0019089	77	t0004354	203	2.18657e-20
#t0021419	67	t0004362	202	2.21965e-23
#t0065881	17	t0004371	202	8.36366e-50
#t0078956	13	t0004369	202	2.31643e-53
#t0164032	5	t0004364	202	3.53551e-62
#t0187715	5	t0004379	202	3.53551e-62
#t0002288	782	t0004388	201	2.18989e-60
#t0018173	82	t0004393	201	1.52901e-18
#t0050423	23	t0004385	201	7.73256e-45
#t0413312	2	t0004397	201	3.16464e-66
#t0121810	8	t0004407	200	7.22054e-58
#t0068667	16	t0004420	199	1.00349e-49
#t0235789	3	t0004414	199	5.58871e-64
#t0003493	517	t0004432	198	1.34107e-22
#t0019859	74	t0004439	198	2.90607e-20
#t0000139	6917	t0004481	196	0
#t0017270	87	t0004471	196	2.90751e-16
#t0017273	87	t0004472	196	2.90751e-16
#t0076461	14	t0004460	196	1.50459e-50
#t0379495	2	t0004467	196	1.56315e-64
#t0039651	32	t0004492	195	2.89625e-37
#t1486060	1	t0004493	195	6.27955e-66
#t0044137	28	t0004503	194	2.02089e-39
#t0001248	1349	t0004525	193	1.83734e-170
#t0001934	919	t0004523	193	4.57235e-87
#t0004488	402	t0004533	193	6.58702e-11
#t0076890	14	t0004526	193	1.30935e-49
#t0001817	970	t0004551	192	8.48099e-97
#t0135705	7	t0004544	192	2.11943e-56
#t0002245	797	t0004568	191	1.77525e-66
#t0003923	461	t0004570	191	2.11581e-17
#t0016352	93	t0004565	191	6.19535e-14
#t0023148	61	t0004558	191	5.00417e-23
#t0032965	40	t0004554	191	7.34418e-32
#t0063016	18	t0004563	191	1.28908e-45
#t0292424	3	t0004562	191	2.74915e-61
#t0000108	7972	t0004582	190	0
#t0002180	821	t0004586	190	5.78093e-71
#t0035302	37	t0004589	190	3.94887e-33
#t0043934	28	t0004580	190	2.78052e-38
#t0044739	27	t0004583	190	6.47814e-39
#t0003858	470	t0004612	189	7.83205e-19
#t0022328	64	t0004607	189	1.5057e-21
#t0081692	13	t0004600	189	2.91778e-49
#t0084529	12	t0004601	189	3.40597e-50
#t0031508	42	t0004630	188	4.14152e-30
#t0092952	11	t0004626	188	7.68301e-51
#t0103207	9	t0004614	188	7.05579e-53
#t0019496	75	t0004647	187	9.74532e-18
#t0024127	58	t0004638	187	3.3392e-23
#t0340890	2	t0004640	187	1.7427e-61
#t0000037	13196	t0004667	186	0
#t0001720	1019	t0004660	186	1.05799e-108
#t1118374	1	t0004655	186	7.32923e-63
#t0000344	3866	t0004685	185	0
#t0086871	12	t0004689	185	6.27607e-49
#t0250640	3	t0004687	185	2.86207e-59
#t1406563	1	t0004690	185	1.60617e-62
#t0000459	3129	t0004718	184	0
#t0002126	840	t0004714	184	1.20661e-76
#t0024782	56	t0004701	184	2.97398e-23
#t0035492	36	t0004707	184	4.70525e-32
#t0100108	10	t0004705	184	1.47555e-50
#t0115944	8	t0004713	184	1.16626e-52
#t0002208	812	t0004741	183	4.07232e-72
#t0029148	46	t0004733	183	4.96943e-27
#t0073683	14	t0004722	183	1.73502e-46
#t0215674	4	t0004724	183	3.46919e-57
#t0001227	1370	t0004754	182	4.14167e-181
#t0016987	88	t0004751	182	1.68228e-13
#t0042542	29	t0004747	182	2.04562e-35
#t0045489	27	t0004765	182	1.23244e-36
#t0154607	6	t0004757	182	2.66689e-54
#t0218709	4	t0004755	182	7.48118e-57
#t0001564	1096	t0004797	181	4.98367e-126
#t0002174	823	t0004779	181	7.62767e-75
#t0020926	69	t0004778	181	2.8538e-18
#t0026882	51	t0004789	181	1.80342e-24
#t0092575	11	t0004775	181	1.29701e-48
#t0406991	2	t0004794	181	1.86911e-59
#t0001281	1322	t0004802	180	2.74155e-172
#t0002576	698	t0004805	180	6.55152e-54
#t0033753	39	t0004806	180	1.72399e-29
#t0105138	9	t0004807	180	2.68536e-50
#t0030719	43	t0004821	179	2.31237e-27
#t0037218	34	t0004828	179	9.00102e-32
#t0059443	19	t0004840	179	3.22373e-41
#t0001206	1390	t0004846	178	1.11527e-187
#t0019813	74	t0004855	178	3.02053e-16
#t0046040	26	t0004859	178	3.99281e-36
#t0067322	16	t0004857	178	2.95677e-43
#t0149522	6	t0004867	178	5.51985e-53
#t0001414	1218	t0004896	177	1.36654e-152
#t0005025	357	t0004871	177	4.57567e-09
#t0061936	18	t0004892	177	2.25075e-41
#t0123323	8	t0004891	177	2.17722e-50
#t0001859	951	t0004920	176	1.83362e-100
#t0002952	613	t0004902	176	1.01093e-41
#t0018923	78	t0004908	176	8.13166e-15
#t0060808	19	t0004923	176	2.5511e-40
#t0075242	14	t0004917	176	2.60132e-44
#t0230019	4	t0004918	176	7.505e-55
#t0004414	410	t0004938	175	1.0407e-14
#t0005037	356	t0004948	175	2.94348e-09
#t0017592	85	t0004931	175	5.81953e-13
#t0024564	57	t0004944	175	7.33916e-21
#t0068830	16	t0004934	175	2.4455e-42
#t1454163	1	t0004942	175	4.09658e-59
#t0003595	503	t0004954	174	2.31678e-26
#t0004355	416	t0004971	174	1.45807e-15
#t0018796	78	t0004952	174	1.91033e-14
#t0022342	64	t0004970	174	2.41534e-18
#t0066988	16	t0004956	174	4.94101e-42
#t0147258	6	t0004966	174	1.13922e-51
#t0301205	3	t0004962	174	1.41879e-55
#t0000055	11495	t0004991	173	0
#t0001416	1217	t0004990	173	1.28908e-154
#t0024369	58	t0004984	173	4.48051e-20
#t0106014	9	t0004987	173	4.79782e-48
#t0002456	730	t0005006	172	3.68907e-62
#t0067572	16	t0005000	172	2.01417e-41
#t0077385	14	t0005005	172	4.51551e-43
#t0275256	3	t0005013	172	6.65672e-55
#t1032930	1	t0005010	172	4.30675e-58
#t0000199	5779	t0005034	171	0
#t0001666	1042	t0005028	171	1.80053e-120
#t0002315	772	t0005027	171	7.6039e-70
#t0002935	617	t0005022	171	6.40545e-44
#t0019223	77	t0005045	171	3.85094e-14
#t0021840	66	t0005029	171	4.04156e-17
#t0025369	55	t0005023	171	1.13892e-20
#t0058972	19	t0005033	171	7.93047e-39
#t0074202	14	t0005024	171	9.2072e-43
#t0079738	13	t0005039	171	1.26257e-43
#t0109320	9	t0005026	171	2.1058e-47
#t0130326	7	t0005040	171	1.54504e-49
#t1276720	1	t0005025	171	9.43402e-58
#t0002680	670	t0005070	170	8.51817e-53
#t0004258	426	t0005051	170	1.67308e-17
#t0045818	26	t0005055	170	7.38347e-34
#t0293877	3	t0005057	170	3.12201e-54
#t0294278	3	t0005060	170	3.12201e-54
#t0000121	7444	t0005078	169	0
#t0003165	568	t0005088	169	5.26676e-37
#t0042467	29	t0005103	169	8.28536e-32
#t0051891	23	t0005100	169	1.79589e-35
#t0081938	13	t0005093	169	5.2991e-43
#t0090338	11	t0005089	169	8.23771e-45
#t0000342	3893	t0005119	168	0
#t0000460	3123	t0005108	168	0
#t0003079	585	t0005107	168	6.8194e-40
#t0029622	45	t0005111	168	8.63876e-24
#t0030497	44	t0005117	168	3.30599e-24
#t0081544	13	t0005122	168	1.08495e-42
#t0175930	5	t0005105	168	6.63519e-51
#t0001777	993	t0005157	167	7.17204e-113
#t0026617	52	t0005143	167	7.65906e-21
#t0057034	20	t0005155	167	6.33391e-37
#t0080092	13	t0005158	167	2.22042e-42
#t0214833	4	t0005132	167	7.47779e-52
#t1505567	1	t0005149	167	2.17141e-56
#t0001250	1348	t0005178	166	4.17923e-186
#t0022502	64	t0005185	166	1.08174e-16
#t0028312	48	t0005162	166	4.10737e-22
#t0039501	32	t0005167	166	2.38794e-29
#t0419068	2	t0005188	166	2.20546e-54
#t0003344	542	t0005200	165	2.66058e-34
#t0004153	438	t0005212	165	5.00829e-20
#t0041378	30	t0005211	165	3.72551e-30
#t0050782	23	t0005203	165	2.54357e-34
#t0057285	20	t0005194	165	2.45661e-36
#t0181819	5	t0005202	165	6.50058e-50
#t0003368	537	t0005228	164	7.4975e-34
#t0182614	5	t0005223	164	1.39049e-49
#t0000078	9661	t0005234	163	0
#t0003021	597	t0005232	163	2.35069e-43
#t0041644	30	t0005239	163	1.2986e-29
#t0067534	16	t0005241	163	1.09584e-38
#t0002563	702	t0005256	162	3.79039e-61
#t0002932	617	t0005269	162	6.80659e-47
#t0003520	514	t0005263	162	4.66571e-31
#t0004266	425	t0005250	162	4.54373e-19
#t0026461	52	t0005272	162	1.02815e-19
#t0030899	43	t0005266	162	3.61549e-23
#t0199863	4	t0005257	162	3.44765e-50
#t0002762	650	t0005285	161	1.12594e-52
#t0003255	556	t0005286	161	1.33224e-37
#t0043953	28	t0005283	161	3.54532e-30
#t0088724	11	t0005278	161	2.74788e-42
#t0133657	7	t0005305	160	5.85001e-46
#t1558728	1	t0005321	160	5.24488e-54
#t0001675	1039	t0005335	159	4.03101e-126
#t0041706	30	t0005343	159	1.56027e-28
#t0122543	8	t0005349	159	1.42436e-44
#t1314061	1	t0005340	159	1.14842e-53
#t0000426	3282	t0005362	158	0
#t0002211	810	t0005358	158	3.36152e-82
#t0005255	340	t0005369	158	2.7231e-10
#t0073674	14	t0005355	158	9.30684e-39
#t0000298	4302	t0005373	157	0
#t0000824	1934	t0005378	157	2.86558e-322
#t0001625	1063	t0005385	157	4.72792e-132
#t0001821	969	t0005390	157	3.30141e-113
#t0019092	77	t0005386	157	1.2204e-11
#t0021977	65	t0005406	156	2.03533e-14
#t0025259	55	t0005413	156	2.19628e-17
#t0092811	11	t0005401	156	1.02473e-40
#t0150330	6	t0005391	156	9.03092e-46
#t0158247	6	t0005416	156	9.03092e-46
#t0035891	36	t0005428	155	1.67893e-24
#t0086193	12	t0005429	155	1.62269e-39
#t0091752	11	t0005443	155	2.1106e-40
#t0105695	9	t0005435	155	2.77721e-42
#t0107503	9	t0005441	155	2.77721e-42
#t1675294	1	t0005442	155	2.63867e-52
#t0039028	32	t0005448	154	3.61613e-26
#t0207481	4	t0005458	154	1.57115e-47
#t1290847	1	t0005451	154	5.77649e-52
#t0077308	14	t0005490	153	3.15927e-37
#t0418326	2	t0005496	153	5.41534e-50
#t1225349	1	t0005477	153	1.26452e-51
#t0021748	66	t0005515	152	2.19506e-13
#t0037735	34	t0005507	152	1.13109e-24
#t0056597	20	t0005504	152	1.54364e-32
#t0067390	16	t0005505	152	2.27851e-35
#t0087204	12	t0005511	152	1.38919e-38
#t0035823	36	t0005520	151	1.7216e-23
#t0055310	21	t0005527	151	1.36238e-31
#t0072573	15	t0005530	151	7.88393e-36
#t0000530	2788	t0005543	150	0
#t0023573	60	t0005568	150	1.26072e-14
#t0042537	29	t0005542	150	1.19377e-26
#t0075401	14	t0005567	150	2.60203e-36
#t0161154	5	t0005546	150	5.72498e-45
#t0232836	4	t0005569	150	3.3414e-46
#t0049512	24	t0005571	149	3.61437e-29
#t0049043	24	t0005583	149	3.61437e-29
#t0142686	6	t0005576	149	1.74357e-43
#t0346371	2	t0005574	149	1.21135e-48
#t0798063	1	t0005580	149	2.9026e-50
#t0003293	550	t0005602	148	8.29062e-41
#t0025863	54	t0005616	148	5.26228e-16
#t0097281	10	t0005609	148	4.10469e-39
#t0221610	4	t0005604	148	1.53939e-45
#t0001048	1584	t0005656	147	1.81559e-250
#t0002905	622	t0005634	147	4.33238e-53
#t0032318	41	t0005635	147	2.21355e-20
#t0037608	34	t0005629	147	2.14242e-23
#t0037950	34	t0005655	147	2.14242e-23
#t0072371	15	t0005637	147	1.27311e-34
#t0127223	7	t0005639	147	9.51783e-42
#t0001553	1110	t0005678	146	5.31331e-148
#t0002266	790	t0005669	146	6.74222e-84
#t0004259	426	t0005662	146	5.96358e-23
#t0004803	375	t0005661	146	2.22497e-16
#t0091597	11	t0005681	146	1.38102e-37
#t0485570	2	t0005668	146	1.24483e-47
#t0929005	1	t0005673	146	3.04255e-49
#t0026758	51	t0005687	145	2.52785e-16
#t0031123	43	t0005698	145	3.93204e-19
#t0098935	10	t0005717	145	3.61179e-38
#t0120202	8	t0005692	145	4.4548e-40
#t0817949	1	t0005704	145	6.65807e-49
#t1399455	1	t0005705	145	6.65807e-49
#t0000033	13676	t0005735	144	0
#t0003356	538	t0005733	144	3.2402e-40
#t0031918	41	t0005719	144	1.13832e-19
#t0192370	4	t0005723	144	3.26052e-44
#t0237352	3	t0005720	144	1.59361e-45
#t0000043	12525	t0005762	143	0
#t0045326	27	t0005758	143	7.8271e-26
#t0057558	20	t0005753	143	6.11905e-30
#t0091676	11	t0005772	143	1.18921e-36
#t0005420	330	t0005786	142	5.72628e-12
#t0051934	23	t0005794	142	8.31771e-28
#t0002406	743	t0005827	141	2.46455e-77
#t0005506	324	t0005814	141	1.69447e-11
#t0038441	33	t0005804	141	2.46413e-22
#t0435511	2	t0005809	141	6.03568e-46
#t0000135	6981	t0005862	140	0
#t0004585	392	t0005840	140	7.03604e-20
#t0068908	16	t0005849	140	8.72114e-32
#t0082783	13	t0005869	140	4.65031e-34
#t0089999	11	t0005852	140	1.01959e-35
#t0096426	10	t0005846	140	1.34282e-36
#t0202551	4	t0005857	140	6.88591e-43
#t0624952	1	t0005837	140	3.33888e-47
#t0000602	2464	t0005884	139	0
#t0000731	2137	t0005888	139	0
#t0002998	602	t0005899	139	1.08639e-52
#t0005325	335	t0005891	139	4.35715e-13
#t0030216	44	t0005881	139	2.17593e-17
#t0050915	23	t0005893	139	5.68747e-27
#t0095682	10	t0005873	139	2.76368e-36
#t0496579	2	t0005892	139	2.84895e-45
#t0001751	1005	t0005903	138	8.22127e-131
#t0002872	628	t0005911	138	1.24162e-57
#t0028214	48	t0005922	138	8.51276e-16
#t0030471	44	t0005908	138	3.65637e-17
#t0037703	34	t0005912	138	3.94418e-21
#t0041956	30	t0005930	138	5.54375e-23
#t0062403	18	t0005904	138	8.26289e-30
#t0061493	18	t0005916	138	8.26289e-30
#t0143476	6	t0005909	138	6.641e-40
#t1466397	1	t0005920	138	1.59792e-46
#t0033885	39	t0005953	137	8.37789e-19
#t0035869	36	t0005934	137	5.0579e-20
#t0041432	30	t0005932	137	1.00608e-22
#t0211541	4	t0005966	137	6.77011e-42
#t1580753	1	t0005954	137	3.49541e-46
#t1675588	1	t0005965	137	3.49541e-46
#t0002277	787	t0005996	136	4.39229e-88
#t0004472	404	t0005995	136	1.73646e-22
#t0033201	40	t0005991	136	3.51211e-18
#t0081262	13	t0005976	136	7.68897e-33
#t0146318	6	t0005986	136	2.96281e-39
#t0183800	5	t0005985	136	2.26236e-40
#t0505244	2	t0005990	136	2.91944e-44
#t0526077	2	t0005999	136	2.91944e-44
#t0000040	12781	t0006003	135	0
#t0002609	688	t0006016	135	9.04114e-70
#t0003312	548	t0006034	135	5.55121e-45
#t0028379	48	t0006011	135	3.74938e-15
#t0073755	14	t0006001	135	9.11759e-32
#t0083515	12	t0006008	135	2.45731e-33
#t0100930	10	t0006015	135	4.93529e-35
#t0416799	2	t0006035	135	6.3399e-44
#t1029919	1	t0006033	135	1.67232e-45
#t0000001	38806	t0006074	134	0
#t0001241	1356	t0006079	134	6.83576e-209
#t0005484	326	t0006058	134	4.99828e-13
#t0026040	53	t0006062	134	2.00707e-13
#t0027921	49	t0006047	134	1.26639e-14
#t0031124	43	t0006048	134	1.27961e-16
#t0055816	21	t0006064	134	9.26405e-27
#t0078962	13	t0006050	134	3.11503e-32
#t0101365	10	t0006054	134	1.01331e-34
#t0000818	1940	t0006081	133	0
#t0024929	56	t0006120	133	2.16395e-12
#t0044081	28	t0006098	133	1.15859e-22
#t0069209	16	t0006102	133	1.02468e-29
#t0112709	8	t0006080	133	3.00841e-36
#t0149398	6	t0006118	133	2.78566e-38
#t0166865	5	t0006096	133	2.17236e-39
#t0472811	2	t0006095	133	2.9889e-43
#t0000576	2573	t0006146	132	0
#t0001908	930	t0006123	132	9.23957e-119
#t0005714	312	t0006132	132	7.98108e-12
#t0032244	41	t0006126	132	6.93315e-17
#t0076036	14	t0006127	132	7.26648e-31
#t0086006	12	t0006129	132	2.0388e-32
#t0094760	11	t0006159	132	3.06932e-33
#t0155058	6	t0006148	132	5.87579e-38
#t0223139	4	t0006149	132	3.0425e-40
#t0206586	4	t0006156	132	3.0425e-40
#t0001847	956	t0006162	131	1.08501e-124
#t0003714	486	t0006171	131	3.28851e-36
#t0004240	428	t0006195	131	2.79666e-27
#t0006139	288	t0006196	131	1.96497e-09
#t0030840	43	t0006176	131	5.98378e-16
#t0049805	24	t0006175	131	3.27671e-24
#t0077136	14	t0006183	131	1.44945e-30
#t0128016	7	t0006177	131	1.35227e-36
#t0247449	3	t0006174	131	3.48318e-41
#t0000230	5211	t0006242	130	0
#t0000764	2056	t0006209	130	0
#t0001456	1184	t0006200	130	8.27377e-174
#t0001974	900	t0006224	130	9.81744e-114
#t0004133	439	t0006229	130	3.23611e-29
#t0004577	394	t0006235	130	1.15907e-22
#t0029685	45	t0006220	130	4.70491e-15
#t0033633	39	t0006207	130	3.6277e-17
#t0065641	17	t0006215	130	3.7399e-28
#t0229401	4	t0006233	130	1.392e-39
#t0307524	3	t0006231	130	7.50443e-41
#t0413832	2	t0006240	130	3.05705e-42
#t0875477	1	t0006226	130	8.36502e-44
#t0003861	469	t0006259	129	3.65379e-34
#t0035933	36	t0006252	129	4.27778e-18
#t0057635	20	t0006257	129	5.873e-26
#t0149222	6	t0006273	129	5.50358e-37
#t0162798	5	t0006250	129	4.41725e-38
#t0290797	3	t0006256	129	1.61654e-40
#t0452868	2	t0006251	129	6.63442e-42
#t0040691	31	t0006295	128	5.75421e-20
#t0064990	17	t0006304	128	1.42351e-27
#t0066627	16	t0006276	128	3.0138e-28
#t0002783	645	t0006321	127	2.42767e-65
#t0004325	418	t0006309	127	5.86692e-27
#t0025768	54	t0006325	127	9.06898e-12
#t0031196	43	t0006331	127	4.56209e-15
#t0031656	42	t0006315	127	2.08256e-15
#t0038285	33	t0006335	127	7.56946e-19
#t0087511	12	t0006333	127	6.84794e-31
#t0002387	749	t0006356	126	1.26902e-85
#t0039692	32	t0006376	126	4.97725e-19
#t0086545	12	t0006353	126	1.38026e-30
#t0200870	4	t0006370	126	2.90597e-38
#t0000424	3288	t0006397	125	0
#t0001571	1092	t0006402	125	3.89454e-157
#t0003679	492	t0006385	125	3.13777e-39
#t0059887	19	t0006389	125	1.94019e-25
#t0002586	695	t0006434	124	3.84547e-76
#t0031154	43	t0006432	124	2.05201e-14
#t0032971	40	t0006411	124	1.95059e-15
#t0037162	34	t0006418	124	1.04894e-17
#t0124592	7	t0006408	124	2.35908e-34
#t0002275	788	t0006444	123	7.13817e-95
#t0005404	331	t0006446	123	5.96603e-16
#t0026105	53	t0006443	123	2.88168e-11
#t0109612	9	t0006457	123	3.63052e-32
#t0119774	8	t0006450	123	4.46739e-33
#t0115985	8	t0006466	123	4.46739e-33
#t0200381	4	t0006460	123	2.83115e-37
#t0294563	3	t0006458	123	1.60919e-38
#t0484875	2	t0006462	123	6.91412e-40
#t1544168	1	t0006472	123	1.99631e-41
#t0003314	547	t0006488	122	9.81953e-50
#t0004249	427	t0006524	122	7.93629e-30
#t0024047	59	t0006510	122	1.29938e-09
#t0027269	50	t0006511	122	6.98181e-12
#t0033673	39	t0006494	122	2.42891e-15
#t0057704	20	t0006502	122	5.35732e-24
#t0105680	9	t0006508	122	7.46099e-32
#t0003603	502	t0006557	121	2.41333e-42
#t0004184	434	t0006533	121	3.12553e-31
#t0004403	411	t0006574	121	1.10046e-27
#t0006962	252	t0006553	121	1.88134e-07
#t0025279	55	t0006571	121	2.2052e-10
#t0078938	13	t0006550	121	2.59647e-28
#t0135809	7	t0006552	121	2.14197e-33
#t0326375	2	t0006535	121	3.25053e-39
#t1605250	1	t0006570	121	9.53559e-41
#t0025407	55	t0006595	120	3.36419e-10
#t0040512	31	t0006588	120	5.54671e-18
#t0186242	5	t0006606	120	3.81391e-35
#t0790681	1	t0006594	120	2.08384e-40
#t0000235	5136	t0006652	119	0
#t0000726	2153	t0006654	119	0
#t0003738	483	t0006651	119	7.17056e-40
#t0004177	435	t0006647	119	4.91652e-32
#t0027391	50	t0006621	119	2.69643e-11
#t1389331	1	t0006640	119	4.55359e-40
#t0001157	1449	t0006661	118	1.06731e-241
#t0003024	596	t0006671	118	3.04536e-60
#t0036974	35	t0006688	118	6.78187e-16
#t0074130	14	t0006663	118	1.07113e-26
#t0095192	10	t0006659	118	9.39229e-30
#t1284722	1	t0006669	118	9.94978e-40
#t1687267	1	t0006697	118	9.94978e-40
#t0002060	864	t0006736	117	1.07646e-113
#t0029866	45	t0006706	117	2.59033e-12
#t0185195	5	t0006729	117	3.61143e-34
#t0251399	3	t0006714	117	1.59114e-36
#t0005096	351	t0006773	116	2.44676e-20
#t0005382	332	t0006756	116	9.82051e-18
#t0027611	49	t0006740	116	5.53171e-11
#t0033786	39	t0006763	116	5.25421e-14
#t0034665	38	t0006779	116	2.38275e-14
#t0065993	17	t0006767	116	4.00466e-24
#t0072598	15	t0006757	116	2.01754e-25
#t0115181	8	t0006758	116	7.21227e-31
#t0028202	48	t0006807	115	4.64231e-11
#t0040036	31	t0006793	115	9.14757e-17
#t0045417	27	t0006806	115	1.67338e-18
#t0050189	24	t0006826	115	6.13897e-20
#t0069889	16	t0006830	115	1.79083e-24
#t0296091	3	t0006800	115	7.3459e-36
#t0272591	3	t0006827	115	7.3459e-36
#t0000423	3288	t0006855	114	0
#t0005265	339	t0006864	114	3.43056e-19
#t0005961	299	t0006851	114	6.19845e-14
#t0043561	28	t0006859	114	8.43099e-18
#t0062793	18	t0006847	114	6.03521e-23
#t1326474	1	t0006846	114	2.26647e-38
#t0004248	427	t0006876	113	9.59654e-33
#t0005107	350	t0006886	113	5.33631e-21
#t0006983	251	t0006912	113	1.25135e-08
#t0049616	24	t0006880	113	2.04975e-19
#t0052644	22	t0006898	113	1.97281e-20
#t0069264	16	t0006899	113	6.72035e-24
#t0072529	15	t0006892	113	1.50247e-24
#t0245375	3	t0006883	113	3.38853e-35
#t0290671	3	t0006887	113	3.38853e-35
#t0742090	1	t0006888	113	4.95057e-38
#t0000997	1649	t0006954	112	6.40055e-293
#t0001004	1640	t0006965	112	8.19754e-291
#t0003680	492	t0006929	112	4.88215e-44
#t0027094	51	t0006960	112	1.03038e-09
#t0029557	46	t0006970	112	5.07663e-11
#t0035654	36	t0006957	112	3.71886e-14
#t0045882	26	t0006940	112	3.34722e-18
#t0046322	26	t0006967	112	3.34722e-18
#t0100796	10	t0006945	112	6.57733e-28
#t0126668	7	t0006938	112	1.56491e-30
#t0005065	353	t0006985	111	5.55456e-22
#t0007234	241	t0007012	111	6.18179e-08
#t0073258	15	t0007008	111	5.70142e-24
#t0114334	8	t0006982	111	2.68126e-29
#t0137362	7	t0007003	111	3.24809e-30
#t0607954	1	t0006977	111	2.36139e-37
#t0001554	1107	t0007017	110	1.71078e-170
#t0032538	41	t0007064	110	4.49568e-12
#t0035932	36	t0007032	110	1.04233e-13
#t0038023	33	t0007025	110	8.55675e-15
#t0056505	20	t0007038	110	1.07827e-20
#t0066693	16	t0007022	110	4.84684e-23
#t0077451	14	t0007055	110	2.39767e-24
#t0084741	12	t0007048	110	9.28827e-26
#t0089111	11	t0007026	110	1.64609e-26
#t0107170	9	t0007061	110	4.04827e-28
#t0169327	5	t0007046	110	6.76859e-32
#t0218601	4	t0007033	110	5.30192e-33
#t1511706	1	t0007050	110	5.15674e-37
#t0959440	1	t0007053	110	5.15674e-37
#t0000358	3703	t0007091	109	0
#t0007482	232	t0007094	109	2.34415e-07
#t0035586	36	t0007083	109	1.73951e-13
#t0076201	14	t0007074	109	4.69554e-24
#t0081538	13	t0007082	109	9.62822e-25
#t0277600	3	t0007070	109	7.19096e-34
#t1695639	1	t0007109	109	1.12603e-36
#t0000367	3644	t0007110	108	0
#t0000465	3092	t0007124	108	0
#t0001696	1030	t0007120	108	6.97577e-155
#t0002505	715	t0007113	108	3.43297e-88
#t0002856	631	t0007136	108	1.56119e-71
#t0005004	359	t0007142	108	9.97462e-24
#t0007463	232	t0007137	108	1.62801e-07
#t0036073	36	t0007140	108	2.89674e-13
#t0038960	32	t0007116	108	1.04373e-14
#t0074346	14	t0007128	108	9.18646e-24
#t0527805	2	t0007160	108	7.50834e-35
#t0000847	1875	t0007212	107	0
#t0000877	1843	t0007199	107	0
#t0001124	1493	t0007193	107	1.05934e-260
#t0001932	920	t0007172	107	1.25467e-131
#t0003126	577	t0007196	107	1.1995e-61
#t0005365	333	t0007183	107	3.31386e-20
#t0042094	29	t0007170	107	1.17813e-15
#t0069278	16	t0007191	107	3.46107e-22
#t0141874	6	t0007173	107	6.63131e-30
#t0143080	6	t0007176	107	6.63131e-30
#t0168582	5	t0007185	107	6.34088e-31
#t0382950	2	t0007188	107	1.6246e-34
#t0006892	255	t0007265	106	2.48673e-10
#t0026692	52	t0007263	106	2.10804e-08
#t0031156	43	t0007245	106	1.13728e-10
#t0056006	21	t0007266	106	4.38881e-19
#t0059859	19	t0007230	106	3.73475e-20
#t0080400	13	t0007218	106	7.3643e-24
#t0158259	6	t0007261	106	1.38467e-29
#t0238765	3	t0007221	106	7.09252e-33
#t0287677	3	t0007232	106	7.09252e-33
#t0469547	2	t0007240	106	3.51462e-34
#t0003752	481	t0007305	105	7.02396e-45
#t0006648	265	t0007311	105	1.06057e-11
#t0027018	51	t0007286	105	1.87136e-08
#t0060076	19	t0007288	105	6.99829e-20
#t0341295	2	t0007275	105	7.60215e-34
#t0006154	287	t0007341	104	1.12705e-14
#t0006355	278	t0007317	104	1.6114e-13
#t0033868	39	t0007352	104	1.95426e-11
#t0049282	24	t0007355	104	4.31405e-17
#t0186056	5	t0007354	104	5.91888e-30
#t0193837	4	t0007329	104	4.88706e-31
#t1360665	1	t0007340	104	5.58313e-35
#t1604057	1	t0007356	104	5.58313e-35
#t0001280	1322	t0007362	103	2.28414e-224
#t0005648	316	t0007395	103	7.18099e-19
#t0006416	275	t0007389	103	2.30123e-13
#t0007086	246	t0007371	103	6.97349e-10
#t0033215	40	t0007403	103	6.26628e-11
#t0092920	11	t0007377	103	2.11496e-24
#t0167594	5	t0007390	103	1.24521e-29
#t0197408	4	t0007381	103	1.03748e-30
#t0250372	3	t0007383	103	6.97978e-32
#t0269096	3	t0007408	103	6.97978e-32
#t0003590	504	t0007428	102	2.78353e-50
#t0004797	376	t0007437	102	3.17437e-28
#t0004854	372	t0007417	102	1.37187e-27
#t0033697	39	t0007435	102	5.07122e-11
#t0259937	3	t0007444	102	1.49496e-31
#t0680150	1	t0007427	102	2.65918e-34
#t0037713	34	t0007485	101	2.11116e-12
#t0051309	23	t0007471	101	8.60279e-17
#t0069824	16	t0007512	101	1.70948e-20
#t0103390	9	t0007465	101	2.40688e-25
#t0002763	650	t0007558	100	2.20854e-79
#t0037501	34	t0007566	100	3.50081e-12
#t0054128	21	t0007522	100	1.69093e-17
#t0069144	16	t0007538	100	3.26015e-20
#t0102887	10	t0007561	100	2.98183e-24
#t0150907	6	t0007517	100	1.13575e-27
#t0317829	3	t0007565	100	6.85261e-31
#t1684072	1	t0007564	100	1.26608e-33
#t0001726	1017	t0007621	99	3.00986e-158
#t0005859	304	t0007582	99	3.02883e-18
#t0006408	276	t0007606	99	2.03231e-14
#t0072617	15	t0007595	99	1.5538e-20
#t0094753	11	t0007620	99	3.32629e-23
#t0106843	9	t0007614	99	9.87185e-25
#t0107588	9	t0007624	99	9.87185e-25
#t0152834	6	t0007587	99	2.36308e-27
#t0317438	3	t0007625	99	1.46652e-30
#t0664575	1	t0007585	99	2.7622e-33
#t1410674	1	t0007598	99	2.7622e-33
#t0948222	1	t0007607	99	2.7622e-33
#t0001294	1310	t0007682	98	1.27295e-225
#t0002537	707	t0007659	98	4.21295e-92
#t0039487	32	t0007640	98	2.00302e-12
#t0039603	32	t0007654	98	2.00302e-12
#t0047826	25	t0007700	98	3.87152e-15
#t0119368	8	t0007636	98	3.02036e-25
#t0442609	2	t0007637	98	1.6757e-31
#t1117029	1	t0007631	98	6.02572e-33
#t0956384	1	t0007684	98	6.02572e-33
#t0003349	541	t0007726	97	1.75599e-59
#t0005333	335	t0007751	97	2.11879e-23
#t0029940	45	t0007737	97	1.97006e-08
#t0031486	42	t0007739	97	3.46287e-09
#t0039089	32	t0007732	97	3.34669e-12
#t0042826	29	t0007740	97	2.75659e-13
#t0056791	20	t0007746	97	3.28546e-17
#t0090638	11	t0007749	97	1.31163e-22
#t0112311	9	t0007761	97	4.03598e-24
#t0001969	902	t0007788	96	6.26374e-135
#t0002795	644	t0007814	96	2.53756e-80
#t0003416	530	t0007804	96	7.48674e-58
#t0004770	378	t0007818	96	1.36778e-30
#t0005245	340	t0007802	96	1.74448e-24
#t0035480	36	t0007780	96	1.09886e-10
#t0043875	28	t0007779	96	1.95987e-13
#t0096400	10	t0007784	96	4.80615e-23
#t0174080	5	t0007817	96	2.24297e-27
#t0850967	1	t0007793	96	2.86672e-32
#t0002334	766	t0007832	95	3.09624e-106
#t0002589	695	t0007868	95	2.43836e-91
#t0002604	690	t0007861	95	2.64706e-90
#t0005055	353	t0007833	95	7.30882e-27
#t0006679	263	t0007853	95	1.15556e-13
#t0035838	36	t0007821	95	1.77329e-10
#t0037620	34	t0007835	95	4.23128e-11
#t0042954	29	t0007863	95	7.99933e-13
#t0051957	23	t0007875	95	2.8631e-15
#t0060536	19	t0007865	95	3.44568e-17
#t0140819	6	t0007827	95	4.40366e-26
#t0203208	4	t0007855	95	4.2245e-28
#t0279595	3	t0007826	95	3.06736e-29
#t0004645	387	t0007904	94	8.18288e-33
#t0005220	342	t0007906	94	1.93739e-25
#t0006582	267	t0007934	94	1.96979e-14
#t0006661	264	t0007891	94	4.93234e-14
#t0008408	203	t0007903	94	7.42967e-07
#t0031631	42	t0007888	94	1.27888e-08
#t0033785	39	t0007922	94	2.06937e-09
#t0046198	26	t0007931	94	9.50333e-14
#t0055585	21	t0007918	94	6.13924e-16
#t0086965	12	t0007914	94	5.01081e-21
#t0241443	3	t0007898	94	6.55476e-29
#t0298267	3	t0007919	94	6.55476e-29
#t0409775	2	t0007939	94	3.64228e-30
#t0001674	1040	t0007992	93	9.48798e-168
#t0002711	662	t0007976	93	1.15653e-85
#t0003975	455	t0007966	93	3.46296e-45
#t0005451	328	t0007967	93	1.45815e-23
#t0029317	46	t0007948	93	1.73315e-07
#t0090108	11	t0007961	93	2.01485e-21
#t0307303	3	t0007975	93	1.40027e-28
#t1034964	1	t0007987	93	2.97246e-31
#t0001159	1444	t0008000	92	5.06382e-262
#t0007513	231	t0008008	92	2.55992e-10
#t0047766	25	t0008042	92	1.12914e-13
#t0076720	14	t0008018	92	3.63834e-19
#t0079204	13	t0008026	92	8.63142e-20
#t0089769	11	t0008015	92	3.97832e-21
#t0126086	7	t0008004	92	3.09079e-24
#t0260585	3	t0008030	92	2.99041e-28
#t0510439	2	t0008039	92	1.69598e-29
#t0003440	525	t0008101	91	2.74988e-59
#t0006895	255	t0008051	91	1.45139e-13
#t0054179	21	t0008065	91	3.61018e-15
#t0072549	15	t0008078	91	2.74559e-18
#t0150712	6	t0008054	91	8.12852e-25
#t0190202	4	t0008053	91	8.44412e-27
#t0205053	4	t0008090	91	8.44412e-27
#t0250979	3	t0008077	91	6.38419e-28
#t1632733	1	t0008106	91	1.41265e-30
#t0001287	1314	t0008154	90	3.38477e-233
#t0001378	1239	t0008159	90	1.0454e-215
#t0003158	570	t0008162	90	1.22074e-68
#t0008863	191	t0008116	90	2.69916e-06
#t0008915	190	t0008126	90	3.38583e-06
#t0051754	23	t0008148	90	5.03833e-14
#t0088039	12	t0008157	90	7.31837e-20
#t0096629	10	t0008130	90	3.02286e-21
#t0179481	5	t0008129	90	1.88756e-25
#t0414152	2	t0008160	90	7.89012e-29
#t0995606	1	t0008153	90	3.07907e-30
#t0042022	29	t0008170	89	1.84644e-11
#t0051847	23	t0008217	89	8.88527e-14
#t0096615	10	t0008197	89	6.00676e-21
#t0169721	5	t0008211	89	3.94394e-25
#t0237282	3	t0008171	89	2.90683e-27
#t1536056	1	t0008216	89	6.7105e-30
#t0001563	1097	t0008266	88	1.56376e-184
#t0003003	601	t0008263	88	5.83148e-76
#t0003258	555	t0008236	88	1.07981e-66
#t0005550	322	t0008264	88	3.19381e-24
#t0008758	194	t0008300	88	6.34449e-07
#t0009164	183	t0008247	88	7.99237e-06
#t0031763	42	t0008260	88	1.60378e-07
#t0058614	19	t0008250	88	2.39661e-15
#t0059118	19	t0008271	88	2.39661e-15
#t0066145	17	t0008277	88	2.32724e-16
#t0082622	13	t0008298	88	1.20192e-18
#t0092638	11	t0008253	88	5.97932e-20
#t0136556	7	t0008267	88	5.43744e-23
#t0700224	1	t0008256	88	1.46231e-29
#t1486555	1	t0008273	88	1.46231e-29
#t1671504	1	t0008301	88	1.46231e-29
#t0000565	2615	t0008365	87	0
#t0004435	408	t0008371	87	3.35321e-39
#t0004815	375	t0008361	87	2.19356e-33
#t0039013	32	t0008323	87	4.93447e-10
#t0046701	26	t0008338	87	4.28404e-12
#t0072127	15	t0008321	87	3.52604e-17
#t0214267	4	t0008315	87	1.67601e-25
#t0509435	2	t0008359	87	7.90364e-28
#t0001309	1300	t0008385	86	2.45647e-233
#t0003438	525	t0008404	86	8.92556e-62
#t0004497	401	t0008389	86	2.33549e-38
#t0041912	30	t0008429	86	1.84891e-10
#t0048074	25	t0008393	86	3.04339e-12
#t0097713	10	t0008414	86	4.68236e-20
#t0137271	7	t0008415	86	2.26996e-22
#t1382710	1	t0008398	86	6.9414e-29
#t0000947	1730	t0008466	85	0
#t0003050	591	t0008457	85	1.40192e-75
#t0004468	404	t0008512	85	2.60191e-39
#t0004543	396	t0008478	85	7.1258e-38
#t0004820	374	t0008470	85	5.51924e-34
#t0007461	232	t0008464	85	5.64992e-12
#t0066904	16	t0008453	85	4.40597e-16
#t0092256	11	t0008448	85	4.50767e-19
#t0146913	6	t0008494	85	6.32076e-23
#t0175359	5	t0008441	85	7.47369e-24
#t0179250	5	t0008462	85	7.47369e-24
#t0232672	4	t0008505	85	7.44571e-25
#t0001536	1121	t0008591	84	2.96237e-193
#t0003874	467	t0008523	84	1.74882e-51
#t0005159	346	t0008572	84	1.50375e-29
#t0006191	285	t0008568	84	9.99296e-20
#t0009486	176	t0008590	84	9.32156e-06
#t0051661	23	t0008558	84	1.46578e-12
#t0065771	17	t0008549	84	2.71756e-15
#t0069699	16	t0008596	84	8.20092e-16
#t0287655	3	t0008537	84	1.27791e-25
#t1205168	1	t0008528	84	3.29333e-28
#t0003370	537	t0008656	83	1.01417e-65
#t0004136	439	t0008696	83	1.2313e-46
#t0004254	426	t0008693	83	3.32349e-44
#t0006678	263	t0008655	83	9.50792e-17
#t0006694	263	t0008672	83	9.50792e-17
#t0009419	177	t0008632	83	5.18319e-06
#t0036679	35	t0008616	83	2.39003e-08
#t0041825	30	t0008678	83	8.16445e-10
#t0049361	24	t0008690	83	6.34388e-12
#t0092150	11	t0008612	83	1.72216e-18
#t0126238	7	t0008624	83	1.92413e-21
#t0178279	5	t0008625	83	3.24151e-23
#t0208811	4	t0008689	83	3.30116e-24
#t0501319	2	t0008679	83	1.70078e-26
#t0602465	1	t0008614	83	7.17205e-28
#t0001454	1185	t0008762	82	8.4824e-210
#t0003564	508	t0008752	82	1.84969e-60
#t0006027	295	t0008773	82	6.76596e-22
#t0010026	165	t0008770	82	5.19542e-05
#t0036167	36	t0008760	82	6.84774e-08
#t0040004	31	t0008713	82	2.71095e-09
#t0048175	25	t0008733	82	2.60636e-11
#t0053072	22	t0008701	82	1.7364e-12
#t0061747	18	t0008749	82	2.84715e-14
#t0076694	14	t0008731	82	2.29119e-16
#t0167723	5	t0008739	82	6.74429e-23
#t0188870	5	t0008771	82	6.74429e-23
#t0174923	5	t0008774	82	6.74429e-23
#t0295833	3	t0008734	82	5.78865e-25
#t0527668	2	t0008769	82	3.66075e-26
#t0001102	1517	t0008781	81	1.87962e-289
#t0009355	179	t0008815	81	1.52278e-06
#t0034261	38	t0008849	81	3.30562e-07
#t0043857	28	t0008788	81	4.94456e-10
#t0063721	17	t0008779	81	1.68323e-14
#t0078224	13	t0008783	81	1.14254e-16
#t0091244	11	t0008846	81	6.54464e-18
#t0119144	8	t0008784	81	4.94534e-20
#t0126468	7	t0008795	81	7.96409e-21
#t0155873	6	t0008823	81	1.13497e-21
#t0225146	4	t0008825	81	1.46055e-23
#t0309072	3	t0008841	81	1.23127e-24
#t0729636	1	t0008803	81	3.40002e-27
#t1643012	1	t0008850	81	3.40002e-27
#t0003421	528	t0008881	80	1.64584e-65
#t0003791	476	t0008877	80	3.59809e-55
#t0003835	472	t0008871	80	2.17654e-54
#t0003884	467	t0008950	80	2.0508e-53
#t0005321	335	t0008880	80	3.68137e-29
#t0006571	268	t0008901	80	2.36154e-18
#t0033769	39	t0008898	80	8.55402e-07
#t0034672	37	t0008861	80	2.88528e-07
#t0034863	37	t0008908	80	2.88528e-07
#t0034877	37	t0008913	80	2.88528e-07
#t0036785	35	t0008889	80	9.05514e-08
#t0055363	21	t0008882	80	2.04206e-12
#t0055559	21	t0008896	80	2.04206e-12
#t0075436	14	t0008931	80	8.15907e-16
#t0084558	12	t0008914	80	5.44959e-17
#t0233488	4	t0008949	80	3.06964e-23
#t0003298	549	t0008983	79	2.51884e-70
#t0033410	39	t0008995	79	1.28163e-06
#t0034605	38	t0009019	79	7.56927e-07
#t0055133	21	t0008965	79	3.58415e-12
#t0054638	21	t0009005	79	3.58415e-12
#t0087361	12	t0009004	79	1.04743e-16
#t0100223	10	t0008980	79	5.41317e-18
#t0119275	8	t0008968	79	1.99458e-19
#t0185729	5	t0009018	79	6.0499e-22
#t0221598	4	t0008992	79	6.44784e-23
#t0502448	2	t0009013	79	3.64423e-25
#t1433126	1	t0009001	79	1.61092e-26
#t0926517	1	t0009008	79	1.61092e-26
#t0002276	787	t0009075	78	6.12503e-122
#t0002524	709	t0009042	78	8.50975e-105
#t0003261	555	t0009055	78	4.05781e-72
#t0004462	405	t0009096	78	1.58919e-42
#t0007526	231	t0009105	78	1.49076e-13
#t0008297	206	t0009039	78	3.01445e-10
#t0009156	184	t0009091	78	1.27241e-07
#t0040069	31	t0009057	78	1.79631e-08
#t0045668	27	t0009111	78	1.03959e-09
#t0052742	22	t0009085	78	1.59384e-11
#t0077440	14	t0009093	78	2.88525e-15
#t0082492	13	t0009102	78	7.85979e-16
#t0084915	12	t0009088	78	2.01005e-16
#t0279116	3	t0009030	78	1.18189e-23
#t0496208	2	t0009080	78	7.83488e-25
#t0418794	2	t0009107	78	7.83488e-25
#t1346218	1	t0009062	78	3.50568e-26
#t0001542	1117	t0009195	77	3.99543e-198
#t0003876	467	t0009173	77	6.54233e-55
#t0005825	306	t0009112	77	2.29165e-25
#t0008754	194	t0009177	77	5.51578e-09
#t0010156	163	t0009165	77	1.43617e-05
#t0010529	156	t0009163	77	6.77132e-05
#t0036230	36	t0009194	77	5.84086e-07
#t0051124	23	t0009189	77	6.69917e-11
#t0058073	20	t0009166	77	4.20154e-12
#t0058842	19	t0009133	77	1.55004e-12
#t0190629	4	t0009117	77	2.83996e-22
#t0001141	1477	t0009216	76	1.28559e-284
#t0002937	617	t0009249	76	2.80543e-86
#t0008817	192	t0009206	76	5.94878e-09
#t0009266	181	t0009233	76	1.1604e-07
#t0009964	166	t0009208	76	4.92461e-06
#t0045736	26	t0009205	76	1.32173e-09
#t0047912	25	t0009204	76	6.02387e-10
#t0050809	23	t0009251	76	1.14428e-10
#t0063613	17	t0009198	76	3.37569e-13
#t0142185	6	t0009219	76	4.11936e-20
#t0147107	6	t0009258	76	4.11936e-20
#t1579113	1	t0009267	76	1.65947e-25
#t1107971	1	t0009279	76	1.65947e-25
#t0000480	3022	t0009341	75	0
#t0001933	919	t0009309	75	6.39761e-154
#t0004720	382	t0009343	75	1.39996e-39
#t0005798	308	t0009319	75	2.01218e-26
#t0006774	259	t0009287	75	1.69879e-18
#t0007245	240	t0009285	75	1.20694e-15
#t0007403	234	t0009325	75	8.9521e-15
#t0008773	194	t0009338	75	2.07915e-09
#t0035476	36	t0009301	75	1.34142e-06
#t0036213	36	t0009346	75	1.34142e-06
#t0038215	33	t0009320	75	2.45723e-07
#t0040001	31	t0009302	75	7.16269e-08
#t0082698	13	t0009344	75	5.32393e-15
#t0084048	12	t0009312	75	1.4067e-15
#t0099956	10	t0009299	75	7.9394e-17
#t0103385	9	t0009288	75	1.67064e-17
#t0107683	9	t0009347	75	1.67064e-17
#t0127932	7	t0009314	75	5.51919e-19
#t0170890	5	t0009331	75	1.11637e-20
#t0284881	3	t0009298	75	1.12992e-22
#t0001624	1064	t0009432	74	2.8674e-188
#t0002342	761	t0009412	74	5.58841e-119
#t0002544	706	t0009431	74	8.11853e-107
#t0003301	549	t0009350	74	3.60151e-73
#t0004492	402	t0009413	74	8.66304e-44
#t0008266	208	t0009426	74	1.96683e-11
#t0008985	188	t0009430	74	6.91114e-09
#t0043103	29	t0009435	74	3.06324e-08
#t0068783	16	t0009373	74	3.68389e-13
#t0070489	15	t0009371	74	1.17092e-13
#t0085952	12	t0009353	74	2.68161e-15
#t0086169	12	t0009362	74	2.68161e-15
#t0106621	9	t0009405	74	3.29545e-17
#t0144854	6	t0009386	74	1.72219e-19
#t0147682	6	t0009407	74	1.72219e-19
#t0158829	6	t0009416	74	1.72219e-19
#t0186738	5	t0009414	74	2.30937e-20
#t1427206	1	t0009392	74	7.8503e-25
#t0004130	439	t0009482	73	2.0145e-51
#t0005516	324	t0009477	73	6.14152e-30
#t0009420	177	t0009476	73	8.75887e-08
#t0036914	35	t0009508	73	1.7864e-06
#t0060633	19	t0009524	73	1.52281e-11
#t0084103	12	t0009483	73	5.10297e-15
#t0092501	11	t0009455	73	1.28774e-15
#t0096415	10	t0009468	73	3.01428e-16
#t0112184	9	t0009530	73	6.49156e-17
#t0130860	7	t0009525	73	2.24832e-18
#t0139527	7	t0009532	73	2.24832e-18
#t0226890	4	t0009502	73	5.46898e-21
#t0259738	3	t0009499	73	5.0776e-22
#t0477519	2	t0009489	73	3.58202e-23
#t0606126	1	t0009448	73	1.70701e-24
#t0001856	952	t0009606	72	6.89007e-164
#t0004279	424	t0009609	72	5.51377e-49
#t0004470	404	t0009565	72	4.10348e-45
#t0005640	316	t0009587	72	6.25435e-29
#t0008902	190	t0009568	72	1.44407e-09
#t0009004	188	t0009602	72	2.57123e-09
#t0040306	31	t0009607	72	2.76544e-07
#t0042773	29	t0009569	72	7.79507e-08
#t0080951	13	t0009552	72	3.54689e-14
#t0081854	13	t0009588	72	3.54689e-14
#t0083126	12	t0009540	72	9.69317e-15
#t0216795	4	t0009550	72	1.14379e-20
#t0196911	4	t0009558	72	1.14379e-20
#t0001673	1040	t0009683	71	3.41189e-185
#t0002285	783	t0009662	71	4.53403e-126
#t0005305	336	t0009661	71	7.00495e-33
#t0005802	308	t0009702	71	6.32362e-28
#t0009488	176	t0009706	71	4.56942e-08
#t0050342	23	t0009634	71	1.59228e-09
#t0053310	22	t0009658	71	6.9556e-10
#t0057359	20	t0009639	71	1.19742e-10
#t0057679	20	t0009665	71	1.19742e-10
#t0061045	18	t0009636	71	1.77177e-11
#t0069940	15	t0009625	71	7.25317e-13
#t0087596	12	t0009691	71	1.83783e-14
#t0099047	10	t0009713	71	1.13736e-15
#t0110504	9	t0009682	71	2.50824e-16
#t0154904	6	t0009670	71	1.46162e-18
#t0198122	4	t0009664	71	2.39052e-20
#t0305499	3	t0009690	71	2.27712e-21
#t0341388	2	t0009647	71	1.64873e-22
#t0540893	1	t0009626	71	8.06688e-24
#t1308015	1	t0009660	71	8.06688e-24
#t1039873	1	t0009703	71	8.06688e-24
#t0000161	6462	t0009783	70	0
#t0000305	4245	t0009780	70	0
#t0000600	2473	t0009717	70	0
#t0007779	222	t0009813	70	2.00097e-14
#t0011196	145	t0009748	70	6.86459e-05
#t0044025	28	t0009765	70	1.02121e-07
#t0051807	23	t0009794	70	2.67114e-09
#t0053443	22	t0009770	70	1.17895e-09
#t0059802	19	t0009735	70	8.22191e-11
#t0060280	19	t0009775	70	8.22191e-11
#t0059186	19	t0009785	70	8.22191e-11
#t0078647	13	t0009751	70	1.24353e-13
#t0126961	7	t0009755	70	1.83291e-17
#t0144670	6	t0009769	70	2.97536e-18
#t0184711	5	t0009791	70	4.19428e-19
#t0191049	4	t0009722	70	4.99264e-20
#t0200353	4	t0009771	70	4.99264e-20
#t0370536	2	t0009772	70	3.5353e-22
#t0491437	2	t0009782	70	3.5353e-22
#t1654937	1	t0009817	70	1.75316e-23
#t1664439	1	t0009818	70	1.75316e-23
#t0000351	3825	t0009915	69	0
#t0003025	596	t0009901	69	3.52682e-86
#t0003322	545	t0009857	69	2.68543e-75
#t0004564	395	t0009908	69	8.03074e-45
#t0006299	280	t0009834	69	6.90347e-24
#t0008473	201	t0009832	69	1.00357e-11
#t0010731	153	t0009853	69	7.36156e-06
#t0039813	32	t0009909	69	1.8274e-06
#t0060324	19	t0009878	69	1.43439e-10
#t0068857	16	t0009862	69	7.19954e-12
#t0071672	15	t0009919	69	2.41883e-12
#t0078076	13	t0009828	69	2.32122e-13
#t0082655	13	t0009920	69	2.32122e-13
#t0118159	8	t0009922	69	1.98436e-16
#t0154687	6	t0009865	69	6.05047e-18
#t0157790	6	t0009896	69	6.05047e-18
#t0230678	4	t0009905	69	1.04197e-19
#t0354677	2	t0009855	69	7.57778e-22
#t0000550	2708	t0009939	68	0
#t0004971	362	t0009957	68	5.4603e-39
#t0008105	212	t0009992	68	1.56167e-13
#t0009144	184	t0009962	68	1.04572e-09
#t0009608	173	t0009945	68	2.50502e-08
#t0010589	155	t0010004	68	3.00533e-06
#t0038456	33	t0009935	68	4.7868e-06
#t0038929	32	t0009941	68	2.78485e-06
#t0051631	23	t0009977	68	7.44352e-09
#t0060710	19	t0010003	68	2.49522e-10
#t0063904	17	t0009958	68	3.62968e-11
#t0080342	13	t0009931	68	4.32362e-13
#t0078710	13	t0009966	68	4.32362e-13
#t0100988	10	t0009976	68	8.23442e-15
#t0099014	10	t0010010	68	8.23442e-15
#t0123007	8	t0009995	68	3.92901e-16
#t0127581	7	t0009973	68	7.37989e-17
#t0176998	5	t0009948	68	1.7781e-18
#t0555293	1	t0009936	68	8.27575e-23
#t1214102	1	t0009954	68	8.27575e-23
#t0001873	945	t0010114	67	2.28195e-166
#t0003811	475	t0010072	67	7.27792e-62
#t0003857	470	t0010111	67	7.75321e-61
#t0004360	416	t0010090	67	6.19862e-50
#t0006837	257	t0010106	67	8.85881e-21
#t0007701	225	t0010101	67	9.7316e-16
#t0008391	204	t0010020	67	1.15921e-12
#t0008649	197	t0010056	67	1.10128e-11
#t0010886	150	t0010091	67	6.91835e-06
#t0039091	32	t0010046	67	4.22592e-06
#t0044936	27	t0010098	67	2.13044e-07
#t0091552	11	t0010113	67	6.31077e-14
#t0106741	9	t0010094	67	3.67755e-15
#t0117456	8	t0010102	67	7.76821e-16
#t0136767	7	t0010075	67	1.47801e-16
#t0147235	6	t0010086	67	2.49381e-17
#t0164779	5	t0010043	67	3.65594e-18
#t0288681	3	t0010040	67	4.54988e-20
#t0262565	3	t0010082	67	4.54988e-20
#t0305869	3	t0010083	67	4.54988e-20
#t0508877	2	t0010093	67	3.47753e-21
#t1168814	1	t0010023	67	1.79751e-22
#t1282718	1	t0010041	67	1.79751e-22
#t0005781	309	t0010123	66	4.28339e-30
#t0006259	282	t0010120	66	2.42767e-25
#t0006761	260	t0010195	66	1.27687e-21
#t0008609	198	t0010163	66	4.40356e-12
#t0043068	29	t0010198	66	1.1734e-06
#t0047223	25	t0010132	66	8.8009e-08
#t0083190	12	t0010131	66	4.37217e-13
#t0132831	7	t0010126	66	2.95621e-16
#t0167752	5	t0010166	66	7.50969e-18
#t0208669	4	t0010193	66	9.42883e-19
#t0352438	2	t0010147	66	7.44516e-21
#t0373272	2	t0010167	66	7.44516e-21
#t0499296	2	t0010180	66	7.44516e-21
#t0682578	1	t0010142	66	3.90343e-22
#t0002597	692	t0010206	65	5.2302e-110
#t0003769	479	t0010265	65	7.79732e-64
#t0004588	392	t0010280	65	3.26318e-46
#t0006532	269	t0010210	65	1.71967e-23
#t0007289	238	t0010234	65	2.20233e-18
#t0009301	180	t0010220	65	6.90246e-10
#t0039203	32	t0010262	65	9.60372e-06
#t0044405	27	t0010205	65	5.34722e-07
#t0045663	27	t0010292	65	5.34722e-07
#t0047234	25	t0010221	65	1.42077e-07
#t0077284	14	t0010274	65	8.72908e-12
#t0121643	8	t0010255	65	3.02306e-15
#t0126299	7	t0010229	65	5.9048e-16
#t0182278	5	t0010254	65	1.54104e-17
#t0205234	4	t0010275	65	1.96172e-18
#t0262044	3	t0010272	65	2.02665e-19
#t1187705	1	t0010215	65	8.47479e-22
#t1519354	1	t0010276	65	8.47479e-22
#t0000984	1670	t0010365	64	0
#t0003234	559	t0010336	64	2.07288e-81
#t0005833	306	t0010381	64	2.19265e-30
#t0006274	281	t0010321	64	6.15255e-26
#t0008168	210	t0010324	64	2.26548e-14
#t0009891	168	t0010341	64	1.42209e-08
#t0043900	28	t0010328	64	1.5553e-06
#t0061611	18	t0010369	64	9.03608e-10
#t0088100	12	t0010399	64	1.53056e-12
#t0178316	5	t0010327	64	3.15908e-17
#t0233166	4	t0010408	64	4.07808e-18
#t0316220	3	t0010411	64	4.27327e-19
#t0513019	2	t0010395	64	3.40827e-20
#t0421095	2	t0010414	64	3.40827e-20
#t0926340	1	t0010383	64	1.83958e-21
#t1600280	1	t0010397	64	1.83958e-21
#t1676646	1	t0010417	64	1.83958e-21
#t0000169	6359	t0010474	63	0
#t0002035	874	t0010439	63	3.68842e-153
#t0004433	408	t0010460	63	1.99547e-50
#t0004506	399	t0010518	63	1.26374e-48
#t0005244	340	t0010468	63	3.92749e-37
#t0010308	160	t0010467	63	8.45116e-08
#t0042582	29	t0010433	63	4.30744e-06
#t0042632	29	t0010447	63	4.30744e-06
#t0045393	27	t0010488	63	1.32027e-06
#t0045572	27	t0010516	63	1.32027e-06
#t0055229	21	t0010444	63	1.98916e-08
#t0054316	21	t0010464	63	1.98916e-08
#t0055031	21	t0010541	63	1.98916e-08
#t0058161	20	t0010513	63	8.85051e-09
#t0066253	17	t0010509	63	6.19425e-10
#t0067841	16	t0010505	63	2.34351e-10
#t0074626	14	t0010484	63	2.89388e-11
#t0094668	11	t0010524	63	8.13205e-13
#t0127894	7	t0010482	63	2.34594e-15
#t0152227	6	t0010448	63	4.17772e-16
#t0168850	5	t0010489	63	6.4692e-17
#t0333347	2	t0010440	63	7.28752e-20
#t0000323	4065	t0010580	62	0
#t0001008	1635	t0010615	62	0
#t0001544	1116	t0010630	62	3.31682e-211
#t0002750	652	t0010544	62	3.22383e-103
#t0004182	434	t0010624	62	2.99844e-56
#t0004183	434	t0010660	62	2.99844e-56
#t0004569	394	t0010652	62	3.77893e-48
#t0007217	241	t0010664	62	6.98966e-20
#t0007547	230	t0010595	62	4.2966e-18
#t0008162	211	t0010658	62	4.07206e-15
#t0009273	181	t0010638	62	9.28538e-11
#t0009666	172	t0010563	62	1.51e-09
#t0011200	145	t0010593	62	3.05913e-06
#t0049801	24	t0010594	62	2.98218e-07
#t0054334	21	t0010590	62	3.31753e-08
#t0076898	14	t0010611	62	5.24833e-11
#t0119098	8	t0010556	62	2.29343e-14
#t0134362	7	t0010583	62	4.66576e-15
#t0144677	6	t0010606	62	8.4257e-16
#t0181032	5	t0010597	62	1.32334e-16
#t0265038	3	t0010644	62	1.89612e-18
#t0374709	2	t0010613	62	1.5575e-19
#t0537386	1	t0010542	62	8.66165e-21
#t1248445	1	t0010574	62	8.66165e-21
#t0725710	1	t0010589	62	8.66165e-21
#t1594764	1	t0010654	62	8.66165e-21
#t0000603	2462	t0010796	61	0
#t0001211	1387	t0010716	61	9.87089e-278
#t0001688	1033	t0010718	61	2.53758e-192
#t0002760	650	t0010790	61	1.72423e-103
#t0004482	402	t0010685	61	2.76203e-50
#t0005264	339	t0010766	61	7.04638e-38
#t0006749	261	t0010801	61	1.27644e-23
#t0008295	206	t0010678	61	1.17228e-14
#t0009376	178	t0010725	61	1.33543e-10
#t0010174	162	t0010714	61	1.74627e-08
#t0011475	141	t0010703	61	5.57975e-06
#t0011498	141	t0010770	61	5.57975e-06
#t0011639	139	t0010786	61	9.2615e-06
#t0068764	16	t0010710	61	7.31362e-10
#t0086513	12	t0010708	61	9.85327e-12
#t0086984	12	t0010730	61	9.85327e-12
#t0087690	12	t0010765	61	9.85327e-12
#t0091310	11	t0010788	61	2.88189e-12
#t0105753	9	t0010740	61	1.96327e-13
#t0110806	9	t0010748	61	1.96327e-13
#t0137765	7	t0010761	61	9.26552e-15
#t0130981	7	t0010785	61	9.26552e-15
#t0170181	5	t0010758	61	2.70399e-16
#t0333595	2	t0010687	61	3.32716e-19
#t0488566	2	t0010742	61	3.32716e-19
#t0495003	2	t0010750	61	3.32716e-19
#t1243736	1	t0010699	61	1.87883e-20
#t1538317	1	t0010763	61	1.87883e-20
#t0001736	1012	t0010894	60	3.10079e-188
#t0003241	558	t0010824	60	8.12409e-84
#t0005106	350	t0010839	60	1.74449e-40
#t0005895	302	t0010865	60	2.28133e-31
#t0006035	294	t0010892	60	6.74803e-30
#t0006655	264	t0010895	60	1.5823e-24
#t0008576	199	t0010936	60	6.73814e-14
#t0010382	159	t0010864	60	2.5029e-08
#t0043262	28	t0010840	60	8.77957e-06
#t0044315	28	t0010929	60	8.77957e-06
#t0046926	26	t0010916	60	2.7318e-06
#t0052107	22	t0010808	60	1.91404e-07
#t0058483	19	t0010820	60	1.86803e-08
#t0068296	16	t0010812	60	1.28603e-09
#t0080386	13	t0010807	60	5.75971e-11
#t0090202	11	t0010877	60	5.40662e-12
#t0123248	8	t0010918	60	8.78029e-14
#t0171261	5	t0010914	60	5.51874e-16
#t0190173	4	t0010811	60	7.54928e-17
#t0215548	4	t0010828	60	7.54928e-17
#t0222951	4	t0010869	60	7.54928e-17
#t0225893	4	t0010890	60	7.54928e-17
#t0204772	4	t0010906	60	7.54928e-17
#t0308525	3	t0010915	60	8.39018e-18
#t0325053	2	t0010815	60	7.10409e-19
#t0001466	1174	t0011001	59	5.19203e-228
#t0005637	316	t0011015	59	1.95544e-34
#t0005993	297	t0011003	59	6.98851e-31
#t0007304	238	t0010972	59	1.91043e-20
#t0007924	217	t0011029	59	5.29556e-17
#t0008922	190	t0011018	59	7.54242e-13
#t0009142	184	t0010978	59	5.65199e-12
#t0009680	172	t0011021	59	2.76336e-10
#t0042575	29	t0010953	59	2.28892e-05
#t0050264	24	t0011076	59	1.21994e-06
#t0055358	21	t0010984	59	1.50448e-07
#t0060598	19	t0011047	59	3.15468e-08
#t0073830	14	t0010955	59	3.07879e-10
#t0080179	13	t0011068	59	1.04948e-10
#t0092085	11	t0010952	59	1.01191e-11
#t0089443	11	t0010982	59	1.01191e-11
#t0109702	9	t0010997	59	7.28237e-13
#t0119626	8	t0010967	59	1.71338e-13
#t0177790	5	t0010970	59	1.12502e-15
#t0165453	5	t0010992	59	1.12502e-15
#t0167701	5	t0011013	59	1.12502e-15
#t0490453	2	t0011026	59	1.5161e-18
#t0389854	2	t0011030	59	1.5161e-18
#t0501570	2	t0011035	59	1.5161e-18
#t0421278	2	t0011072	59	1.5161e-18
#t0540326	1	t0010945	59	8.83367e-20
#t1362382	1	t0011002	59	8.83367e-20
#t0000071	10293	t0011159	58	0
#t0000660	2311	t0011081	58	0
#t0001574	1090	t0011153	58	9.71537e-209
#t0002650	677	t0011086	58	8.44683e-112
#t0005223	342	t0011147	58	6.52269e-40
#t0005505	324	t0011115	58	1.99232e-36
#t0006132	288	t0011108	58	1.16991e-29
#t0010120	163	t0011168	58	2.57862e-09
#t0010921	150	t0011189	58	1.22214e-07
#t0047963	25	t0011095	58	3.61989e-06
#t0056854	20	t0011186	58	1.16586e-07
#t0058773	19	t0011121	58	5.30758e-08
#t0088610	11	t0011083	58	1.88929e-11
#t0089760	11	t0011131	58	1.88929e-11
#t0105766	9	t0011166	58	1.39826e-12
#t0112749	8	t0011082	58	3.33724e-13
#t0112912	8	t0011085	58	3.33724e-13
#t0115884	8	t0011162	58	3.33724e-13
#t0117774	8	t0011213	58	3.33724e-13
#t0129865	7	t0011187	58	7.18726e-14
#t0153357	6	t0011118	58	1.37521e-14
#t0266318	3	t0011194	58	3.70168e-17
#t0344592	2	t0011109	58	3.23388e-18
[truncated: 15,489 more rows]

## Sheet: S5
transcript	function	location	length	si_density
Tb927.5.4320	zinc finger protein family member, putative (FIP1)	Tb927_05_v4:1290844-1291737(-)	894	0.0181818
Tb927.5.3990	variant surface glycoprotein (VSG, atypical), putative	Tb927_05_v4:1236331-1237764(+)	1434	3
Tb927.3.1510	variant surface glycoprotein (VSG)-related, putative	Tb927_03_v4:394163-395263(-)	1101	2
Tb927.4.2710	ubiquitin-conjugating enzyme e2, putative,ubiquitin carrier protein, putative,ubiquitin-protein ligase, putative	Tb927_04_v4:714980-715634(+)	640	0.333333
Tb927.8.2861	SRP RNA, 7SL	Tb927_08_v4:860996-861256(-)	261	3
Tb927.3.3190	serine/threonine-protein kinase, putative,protein kinase, putative	Tb927_03_v4:823161-825626(-)	2466	0.0545455
Tb927.5.1710	ribonucleoprotein p18, mitochondrial precursor, putative	Tb927_05_v4:540661-541433(+)	773	0.0363636
Tb09.244.2180	retrotransposon hot spot protein 3 (RHS3), putative	Tb927_09_v4:2447587-2449359(-)	1773	0.0909091
Tb927.4.3860	receptor-type adenylate cyclase GRESAG 4, putative	Tb927_04_v4:1007267-1011712(-)	4446	4.66667
Tb927.4.3870	receptor-type adenylate cyclase GRESAG 4, putative	Tb927_04_v4:1012428-1016873(-)	4446	4.66667
Tb927.4.3880	receptor-type adenylate cyclase GRESAG 4, putative	Tb927_04_v4:1017589-1022559(-)	4971	4.66667
Tb927.4.3750	receptor-type adenylate cyclase GRESAG 4, putative	Tb927_04_v4:971540-977090(+)	5551	3
Tb927.10.2430	receptor-type adenylate cyclase GRESAG 4, putative	Tb927_10_v5:624993-628721(-)	3729	2
Tb927.7.7470	receptor-type adenylate cyclase GRESAG 4, putative	Tb927_07_v4:2147506-2151293(-)	3788	1
Tb11.02.4400	PUF nine target 1;with=GeneDB:Tb927.1.2600 (PNT1)	Tb927_11_01_v4:1817355-1819650(-)	2296	0.0169492
Tb927.1.1530	protein kinase, putative	Tb927_01_v4:385002-390938(+)	5937	0.267857
Tb11.03.0340	protein kinase, putative	Tb927_11_01_v4:200706-202951(+)	2246	0.25
Tb09.211.1380	lipoic acid containing carrier protein, putative;with=GeneDB:LinJ35_V3.4790 (GCVH)	Tb927_09_v4:1509797-1511274(-)	1478	0.333333
Tb927.5.1730	inhibitor of serine peptidase (ISP), putative,ecotin family (I11), putative	Tb927_05_v4:545357-545995(+)	639	0.184848
Tb10.v4.0221	hypothetical protein,chrX additional, unordered contigs	tryp_X-448g06.q1c:39658-40245(-)	588	1
Tb09.160.5340	hypothetical protein, unlikely	Tb927_09_v4:1130090-1130509(+)	420	30
Tb927.1.5210	hypothetical protein, unlikely	Tb927_01_v4:1034021-1034353(-)	333	8
Tb09.211.4060	hypothetical protein, unlikely	Tb927_09_v4:2034797-2035144(+)	348	6
Tb09.211.4040	hypothetical protein, unlikely	Tb927_09_v4:2033211-2033348(-)	138	1
Tb11.01.8790	hypothetical protein, unlikely	Tb927_11_01_v4:4482786-4483250(+)	465	1
Tb09.160.5460	hypothetical protein, unlikely	Tb927_09_v4:1175253-1175594(+)	342	0.25
Tb927.1.1510	hypothetical protein, unlikely	Tb927_01_v4:378094-378501(-)	408	0.0526316
Tb927.10.15630	hypothetical protein, unlikely	Tb927_10_v5:3832717-3833106(-)	390	0.0169492
Tb07.11L3.100	hypothetical protein, conserved,BAC from homolous region on chr7	11L3_v3:30224-34018(-)	3795	0.0181818
Tb927.2.2770	hypothetical protein, conserved (10C8.185)	Tb927_02_v4:540022-541723(+)	1702	0.0363636
Tb927.7.3230	hypothetical protein, conserved	Tb927_07_v4:831283-834019(+)	2737	39
Tb927.8.7280	hypothetical protein, conserved	Tb927_08_v4:2089766-2090626(+)	861	19
Tb11.01.4550	hypothetical protein, conserved	Tb927_11_01_v4:3332204-3332656(+)	453	14
Tb11.02.1610	hypothetical protein, conserved	Tb927_11_01_v4:1185450-1186091(-)	642	6
Tb927.10.5710	hypothetical protein, conserved	Tb927_10_v5:1422098-1422781(+)	684	6
Tb927.8.1680	hypothetical protein, conserved	Tb927_08_v4:560864-561559(-)	696	4
Tb927.10.12650	hypothetical protein, conserved	Tb927_10_v5:3072261-3072854(-)	594	1.25
Tb11.01.1000	hypothetical protein, conserved	Tb927_11_01_v4:2484853-2486590(+)	1738	1
Tb11.17.0004	hypothetical protein, conserved	Tb927_11_01_v4:4802737-4803279(-)	543	1
Tb927.10.15700	hypothetical protein, conserved	Tb927_10_v5:3854999-3865357(+)	10359	1
Tb927.10.4010	hypothetical protein, conserved	Tb927_10_v5:1059453-1061501(-)	2049	1
Tb927.3.2880	hypothetical protein, conserved	Tb927_03_v4:743318-744043(-)	726	1
Tb927.4.1850	hypothetical protein, conserved	Tb927_04_v4:462615-464483(-)	1869	1
Tb927.4.4880	hypothetical protein, conserved	Tb927_04_v4:1332660-1336893(-)	4234	1
Tb927.7.4270	hypothetical protein, conserved	Tb927_07_v4:1135900-1136651(-)	752	1
Tb11.02.3350	hypothetical protein, conserved	Tb927_11_01_v4:1568722-1571847(+)	3027	0.583333
Tb927.8.7830	hypothetical protein, conserved	Tb927_08_v4:2279885-2283519(+)	3635	0.5
Tb09.211.0775	hypothetical protein, conserved	Tb927_09_v4:1401717-1402926(-)	1210	0.361111
Tb927.7.3700	hypothetical protein, conserved	Tb927_07_v4:964705-965935(-)	1231	0.333333
Tb927.4.4550	hypothetical protein, conserved	Tb927_04_v4:1250242-1254141(-)	3900	0.25
Tb927.7.2450	hypothetical protein, conserved	Tb927_07_v4:630506-632324(-)	1819	0.25
Tb927.1.3450	hypothetical protein, conserved	Tb927_01_v4:737757-740175(-)	2419	0.142857
Tb927.6.1890	hypothetical protein, conserved	Tb927_06_v4:626225-628227(-)	2003	0.111111
Tb927.10.8600	hypothetical protein, conserved	Tb927_10_v5:2130956-2134225(+)	3270	0.0909091
Tb927.7.2150	hypothetical protein, conserved	Tb927_07_v4:551648-556076(-)	4429	0.0909091
Tb927.1.2640	hypothetical protein, conserved	Tb927_01_v4:616213-617552(+)	1340	0.0344828
Tb11.01.7370	hypothetical protein, conserved	Tb927_11_01_v4:4104887-4107264(-)	2378	0.0169492
Tb11.02.4110	hypothetical protein, conserved	Tb927_11_01_v4:1733476-1735662(-)	2187	0.0169492
Tb927.4.2430	hypothetical protein, conserved	Tb927_04_v4:631443-633818(+)	2376	0.0169492
Tb927.5.1120	hypothetical protein, conserved	Tb927_05_v4:363852-383602(+)	19751	0.0169492
Tb927.7.1940	hypothetical protein	Tb927_07_v4:464036-464509(+)	474	11
Tb927.1.4920	hypothetical protein	Tb927_01_v4:996672-997259(+)	588	4
Tb927.5.4020	hypothetical protein	Tb927_05_v4:1242055-1242925(-)	871	4
Tb927.1.2020	hypothetical protein	Tb927_01_v4:518621-520453(+)	1833	2.18571
Tb927.10.7150	hypothetical protein	Tb927_10_v5:1800307-1800582(+)	276	1
Tb09.142.0430	hypothetical protein	Tb927_09_v4:183547-183972(+)	426	0.333333
Tb927.1.5150	hypothetical protein	Tb927_01_v4:1025766-1025861(+)	96	0.333333
Tb927.10.10790	hypothetical protein	Tb927_10_v5:2622996-2623451(-)	456	0.25
Tb927.6.1150	hypothetical protein	Tb927_06_v4:446426-447028(-)	603	0.0526316
Tb09.244.2160	hypothetical protein	Tb927_09_v4:2456599-2458292(-)	1694	0.0169492
Tb927.7.6700	hypothetical protein	Tb927_07_v4:1853002-1854461(-)	1460	0.0169492
Tb927.2.4240	GTP binding protein, putative (28H13.470)	Tb927_02_v4:755907-757212(-)	1306	0.125
Tb09.160.5380	expression site-associated gene 11 (ESAG11) protein, putative	Tb927_09_v4:1139014-1140136(-)	1123	8
Tb09.v1.0310	expression site-associated gene 11 (ESAG11) protein, putative	Tb927_09_v4:1160935-1162057(-)	1123	8
Tb09.v4.0065	expression site-associated gene 1 (ESAG 1), putative,chrIX additional, unordered contigs	tryp_IXb-1c10.p1c:14768-15739(-)	972	1.5
Tb10.v4.0218	expression site-associated gene (ESAG) protein, putative,expression site-associated gene 3 (ESAG3) protein, putative,chrX additional, unordered contigs	tryp_X-448g06.q1c:30364-31338(-)	975	1
Tb11.01.6250	expression site-associated gene (ESAG) protein, putative,expression site-associated gene 11 (ESAG11) protein, putative	Tb927_11_01_v4:3824540-3825707(+)	1168	15
Tb927.1.4870	expression site-associated gene (ESAG) protein, putative,expression site-associated gene 1 (ESAG1) protein, putative	Tb927_01_v4:989768-990757(+)	990	1.83333
Tb927.1.4910	expression site-associated gene (ESAG) protein, putative,expression site-associated gene 1 (ESAG1) protein, putative	Tb927_01_v4:994790-995767(+)	978	1.5
Tb11.17.0002	expression site-associated gene (ESAG) protein, putative,expression site-associated gene 1 (ESAG1) protein, putative	Tb927_11_01_v4:4811871-4814476(+)	2606	1
Tb927.1.5120	expression site-associated gene (ESAG) protein, putative,expression site-associated gene 1 (ESAG1) protein, putative	Tb927_01_v4:1020869-1021855(+)	987	0.833333
Tb09.160.3380	calcium/potassium channel (CAKC), putative (28G16.10)	Tb927_09_v4:822365-825055(+)	2691	16
Tb11.01.2420	beta-adaptin 3, putative,adaptin complex 3 subunit, putative	Tb927_11_01_v4:2782358-2785122(+)	2765	0.333333
Tb927.8.4700	amino acid transporter, putative (AATP6)	Tb927_08_v4:1380123-1381721(-)	1599	0.0169492

## Sheet: S6
transcript	function	location	length	si_density
Tb11.01.5900	vacuolar sorting protein, putative	Tb927_11_01_v4:3742634-3743430(+)	797	1
Tb927.10.13020	vacuolar protein sorting complex subunit, putative,Vps16, putative	Tb927_10_v5:3162115-3164862(-)	2748	1
Tb927.6.2770	vacuolar assembly protein vps41, putative	Tb927_06_v4:831096-834530(+)	3435	4.5
Tb927.7.2540	ubiquitin-conjugating enzyme e2, putative,ubiquitin carrier protein, putative,ubiquitin-protein ligase, putative	Tb927_07_v4:651108-652506(-)	1399	0.142857
Tb927.8.1690	serine/threonine-protein kinase, putative	Tb927_08_v4:561910-564461(-)	2552	1
Tb927.3.3970	RNA binding protein, putative	Tb927_03_v4:1113957-1115085(+)	1129	0.5
Tb927.2.100	retrotransposon hot spot protein 1 (RHS1), putative (3B10.5)	Tb927_02_v4:1683-4172(-)	2490	0.0714286
Tb927.10.5310	protein kinase, putative,SNF1-related protein kinases, putative	Tb927_10_v5:1326114-1328303(+)	2190	1
Tb927.7.5930	Protein Associated with Differentiation (TbPAD1)	Tb927_07_v4:1590092-1592013(+)	1922	0.5
Tb09.211.0930	Polyadenylate-binding protein 1 (Poly(A)-binding protein 1) (PABP 1) (PABP1)	Tb927_09_v4:1427437-1429489(-)	2053	1
Tb927.2.2260	phosphatidylinositol kinase related protein, putative (25N14.135)	Tb927_02_v4:433365-446198(-)	12834	0.5
Tb927.8.1610	MSP-B, putative	Tb927_08_v4:537061-538806(+)	1746	0.25
Tb927.8.1620	MSP-B, putative	Tb927_08_v4:539236-540999(+)	1764	0.25
Tb927.8.1630	MSP-B, putative	Tb927_08_v4:541429-543192(+)	1764	0.25
Tb927.8.1640	MSP-B, putative	Tb927_08_v4:543622-545385(+)	1764	0.25
Tb11.01.3600	MRP protein, putative	Tb927_11_01_v4:3081365-3082922(+)	1558	0.111111
Tb09.160.1410	hypothetical protein, unlikely (3C4.395)	Tb927_09_v4:591409-591951(+)	543	1
Tb09.160.1920	hypothetical protein, unlikely (3C4.185)	Tb927_09_v4:641083-641487(+)	405	1
Tb09.211.2140	hypothetical protein, unlikely	Tb927_09_v4:1648539-1648796(+)	258	4
Tb09.211.2120	hypothetical protein, unlikely	Tb927_09_v4:1647056-1647637(+)	582	1
Tb927.1.2620	hypothetical protein, unlikely	Tb927_01_v4:614629-614937(-)	309	1
Tb927.1.800	hypothetical protein, unlikely	Tb927_01_v4:253806-254093(-)	288	1
Tb09.211.4620	hypothetical protein, unlikely	Tb927_09_v4:2147929-2148354(-)	426	0.257576
Tb927.1.1460	hypothetical protein, unlikely	Tb927_01_v4:366324-366866(+)	543	0.257576
Tb927.1.2630	hypothetical protein, unlikely	Tb927_01_v4:615297-615632(-)	336	0.0769231
Tb927.2.2830	hypothetical protein, conserved (10C8.215)	Tb927_02_v4:546092-547638(+)	1547	0.142857
Tb927.5.4040	hypothetical protein, conserved	Tb927_05_v4:1243989-1246513(-)	2525	2
Tb927.8.5360	hypothetical protein, conserved	Tb927_08_v4:1592618-1593106(-)	489	2
Tb09.142.0360	hypothetical protein, conserved	Tb927_09_v4:168474-169115(+)	642	1
Tb09.211.4260	hypothetical protein, conserved	Tb927_09_v4:2072496-2073032(+)	537	1
Tb11.01.5850	hypothetical protein, conserved	Tb927_11_01_v4:3730242-3733427(+)	3186	1
Tb11.02.4970	hypothetical protein, conserved	Tb927_11_01_v4:1970182-1973233(-)	3052	1
Tb927.1.790	hypothetical protein, conserved	Tb927_01_v4:250982-254102(-)	3121	1
Tb927.4.2440	hypothetical protein, conserved	Tb927_04_v4:634720-635965(+)	1246	1
Tb927.5.4140	hypothetical protein, conserved	Tb927_05_v4:1265958-1267547(-)	1590	1
Tb927.10.4400	hypothetical protein, conserved	Tb927_10_v5:1137930-1138421(-)	492	0.5
Tb927.4.3920	hypothetical protein, conserved	Tb927_04_v4:1033815-1037088(-)	3274	0.5
Tb927.6.1480	hypothetical protein, conserved	Tb927_06_v4:518220-522861(-)	4642	0.5
Tb927.8.3880	hypothetical protein, conserved	Tb927_08_v4:1157696-1159616(-)	1921	0.333333
Tb927.8.3890	hypothetical protein, conserved	Tb927_08_v4:1160256-1162242(-)	1987	0.333333
Tb927.8.3900	hypothetical protein, conserved	Tb927_08_v4:1162882-1164214(-)	1333	0.333333
Tb927.5.1270	hypothetical protein, conserved	Tb927_05_v4:419674-420343(+)	670	0.25
Tb11.02.2220	hypothetical protein, conserved	Tb927_11_01_v4:1305996-1306466(+)	471	0.242364
Tb11.02.4290	hypothetical protein, conserved	Tb927_11_01_v4:1789106-1793549(-)	4444	0.2
Tb927.1.4440	hypothetical protein, conserved	Tb927_01_v4:915863-916498(+)	636	0.031746
Tb927.8.8150	hypothetical protein, conserved	Tb927_08_v4:2409886-2411208(+)	1323	0.031746
Tb927.7.6020	hypothetical protein	Tb927_07_v4:1621325-1621789(+)	465	3
Tb11.01.1180	hypothetical protein	Tb927_11_01_v4:2526931-2527422(+)	492	1
Tb927.10.1790	hypothetical protein	Tb927_10_v5:474247-474624(-)	378	1
Tb927.4.3760	hypothetical protein	Tb927_04_v4:981586-982791(-)	1206	1
Tb09.211.2320	hypothetical protein	Tb927_09_v4:1680086-1680637(-)	552	0.142857
Tb927.10.5100	hypothetical protein	Tb927_10_v5:1257107-1257529(+)	423	0.0769231
Tb927.10.14970	hypothetical protein	Tb927_10_v5:3658223-3658747(+)	525	0.015873
Tb09.160.5390	expression site-associated gene 2 (ESAG2) protein, putative	Tb927_09_v4:1140297-1141715(-)	1419	0.333333
Tb09.v1.0320	expression site-associated gene 2 (ESAG2) protein, putative	Tb927_09_v4:1162219-1163637(-)	1419	0.333333
Tb927.1.4890	expression site-associated gene 2 (ESAG2) protein, putative	Tb927_01_v4:992004-993368(+)	1365	0.333333
Tb927.1.5100	expression site-associated gene 2 (ESAG2) protein, putative	Tb927_01_v4:1018098-1019468(+)	1371	0.333333
Tb11.57.0008	calpain-like protein, putative,cytoskeleton assocociated protein, putative	Tb927_11_01_v4:279066-296583(+)	17518	1.90323
Tb927.10.13030	calpain-like cysteine peptidase, putative,cysteine peptidase, Clan CA, family C2, putative	Tb927_10_v5:3165108-3167144(-)	2037	4
Tb11.47.0036	calpain, putative,cysteine peptidase, Clan CA, family C2, putative	Tb927_11_01_v4:296685-300914(+)	4230	0.225806
Tb09.244.2600	ankyrin-repeat protein, putative	Tb927_09_v4:2336519-2345665(+)	9147	0.5

## Sheet: S7
Name of primers	Sequence of primers 5’→3’
Sequences of siRNAs
siRNA-1	UGAUAACCCGACAUCACAUAACUC
siRNA-2	UACACCGCAGAAAUACGCAACAA
Primers for siRNAs
nat-siRNA-1 RT primer	CTCAACTGGTGTCGTGGAGTCGGCAATTCAGTTGAGGAGTTATG
nat-siRNA-1 PCR forward primer	ACACTCCAGCTGGGTGATAACCCGACATCA
nat-siRNA-2 RT primer	CTCAACTGGTGTCGTGGAGTCGGCAATTCAGTTGAGTTGTTGCG
	ACACTCCAGCTGGGTACACCGCAGAAATAC
nat-siRNA-2 PCR forward primer
Small RNA general reverse primer	AACTGGTGTCGTGGAGTCGG
U6 RT primer	CTCAACTGGTGTCGTGGAGTCGGCAATTCAGTTGAGGGGACAAA
U6 PCR forward primer	ACACTCCAGCTGGGGGAGCCCTTCGGGGAC
Primers for genes
TbDCL1 forward primer	GATGAAG TTGGTGCTCTGAC
TbDCL1 reverse primer	CTCTTCACCTGTAAGTTGTG
β-tubulin forward primer	AATCGTCTGCGT TCAGGCTG
β-tubulin reverse primer	AGAGTCACCCTGGTAGGTAC
Tb927.2.1180 forward primer	CCATATATAATGCGAAATGG
Tb927.2.1180 reverse primer	TCAACATTCGCAGGAAGAGG
