# Supplementary material
Source: HighWire-hosted journal article supplement (doi:10.1101/rna.035683.112)

A

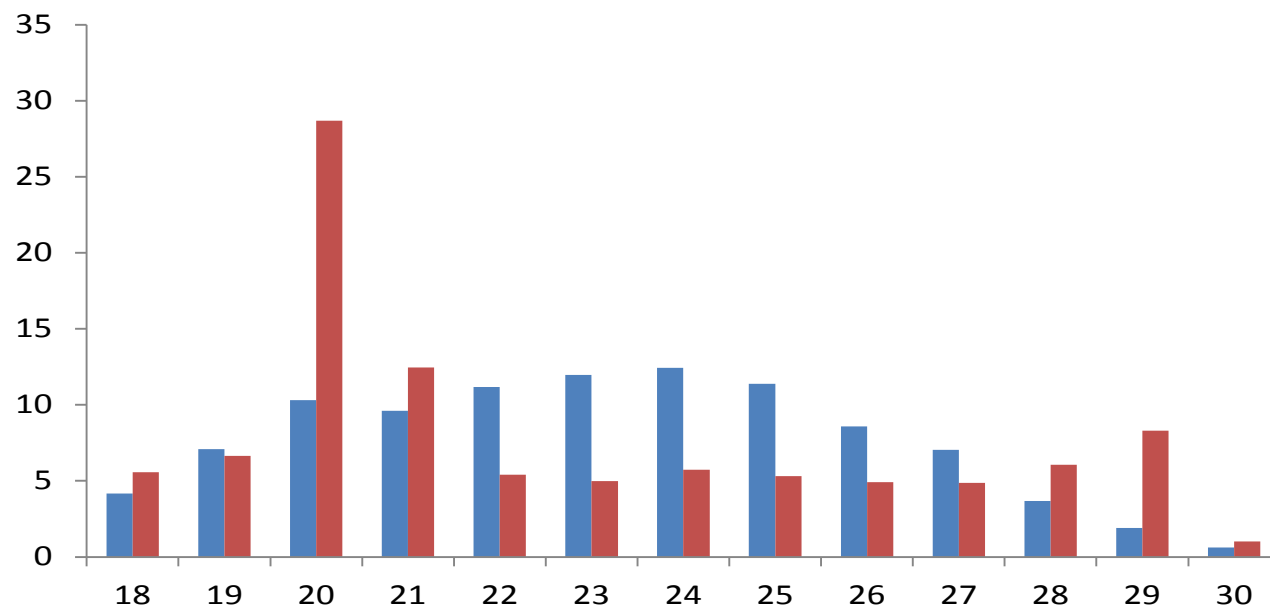

B

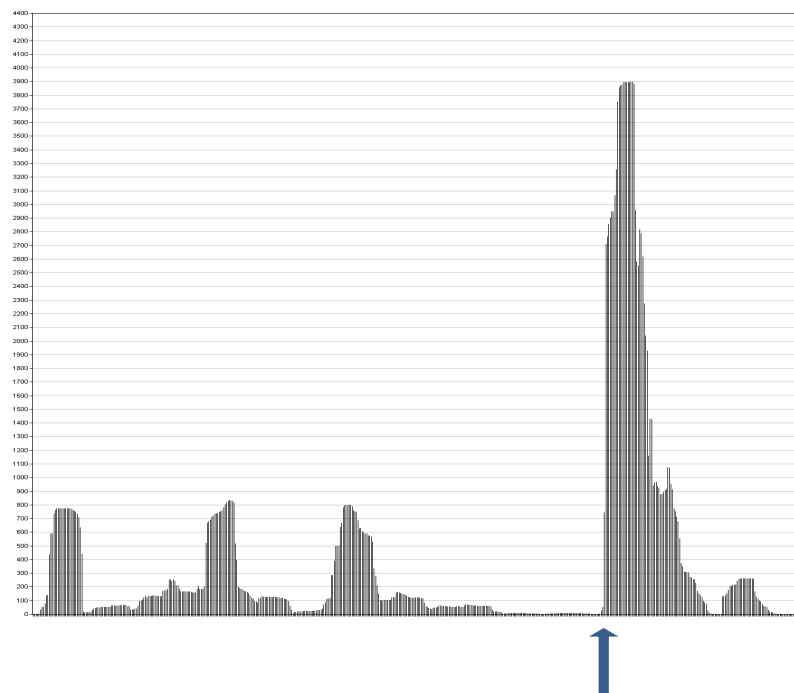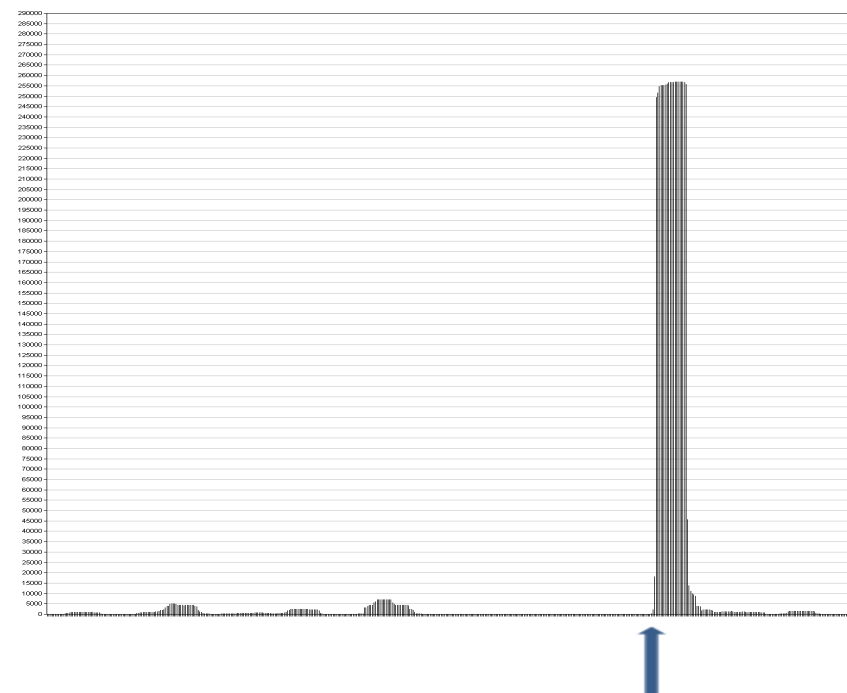

Supplement: Figure_S1.pdf [file Figure_S1.pdf]

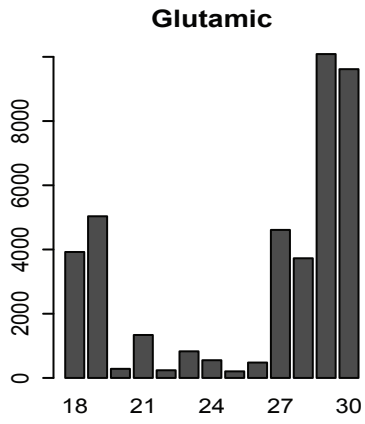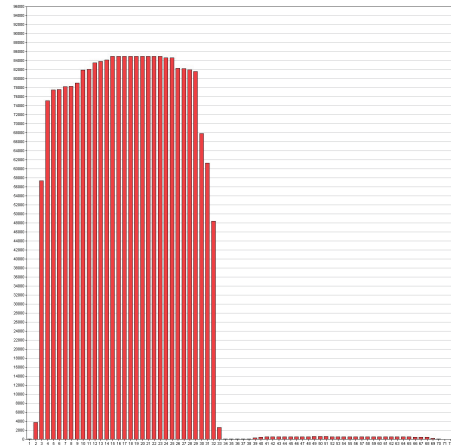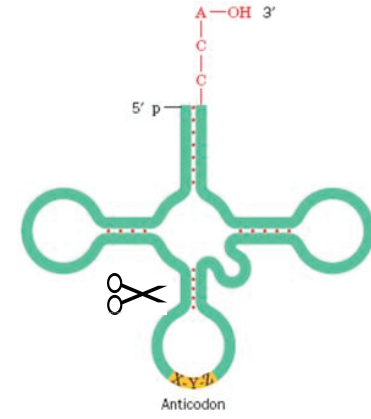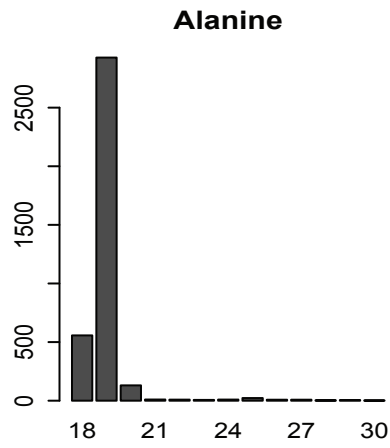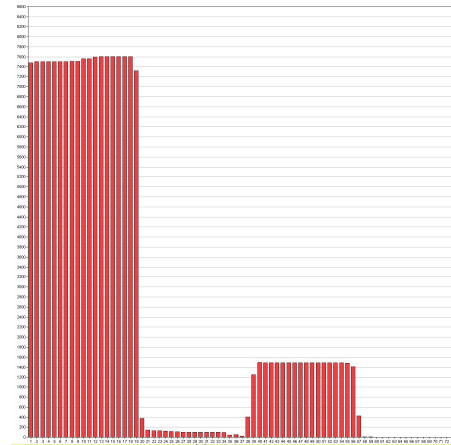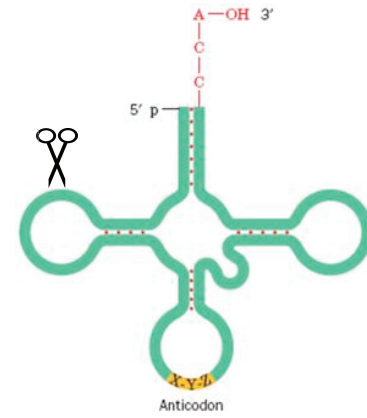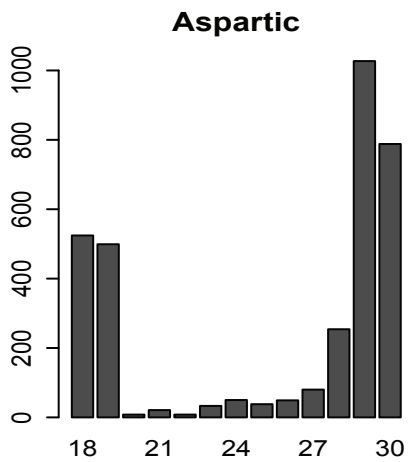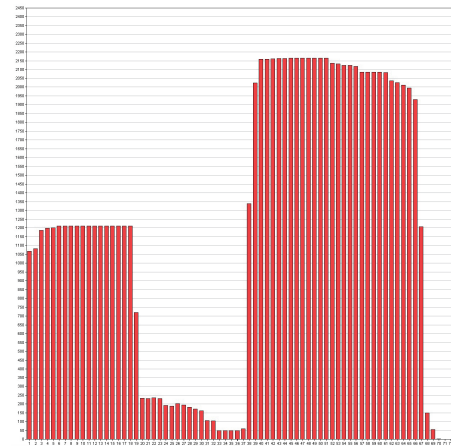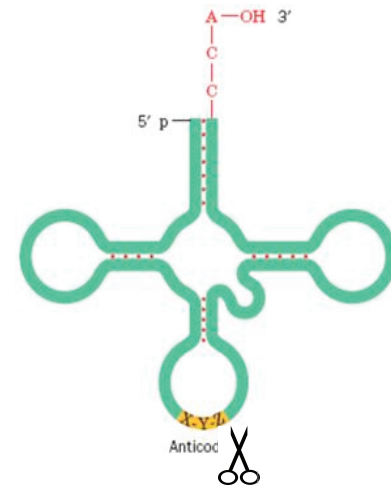

Supplement: Figure_S3.pdf [file Figure_S3.pdf]

A

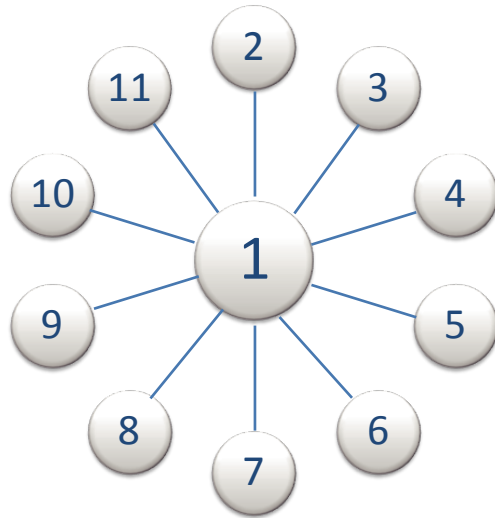

1: Tb927.10.16260

7: Tb09.244.1860

2: Tb10.v4.0187

8: Tb927.6.5620

3: Tb927.10.16350

9: Tb11.v4.0050

4: Tb11.57.0027

10: Tb09.v4.0141

5: Tb927.6.5500

6: Tb11.1510

11: Tb11.24.0012

B

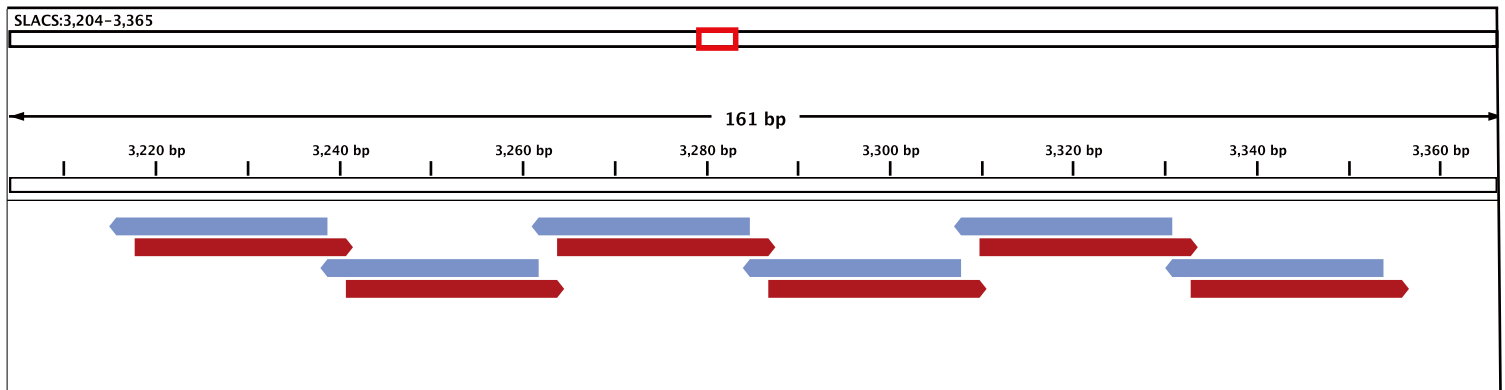

Supplement: Figure_S4.pdf [file Figure_S4.pdf]
